1 **Dynamic genome wide expression profiling of *Drosophila* head**  
2 **development reveals a novel role of Hunchback in retinal glia cell**  
3 **development and blood-brain barrier integrity**

4

5 Montserrat Torres-Oliva<sup>1</sup>, Julia Schneider<sup>1</sup>, Gordon Wiegler<sup>1</sup>, Felix Kaufholz<sup>1</sup>, Nico Posnien<sup>1+</sup>

6

7 <sup>1</sup>Universität Göttingen, Johann-Friedrich-Blumenbach-Institut für Zoologie und Anthropologie,  
8 Abteilung für Entwicklungsbiologie, GZMB Ernst-Caspari-Haus, Justus-von-Liebig-Weg 11, 37077  
9 Göttingen, Germany

10

11 <sup>+</sup>Correspondence: nposnie@gwdg.de

12

13 MT-O: mtorres@gwdg.de

14 JS: schneider.julia86@gmail.com

15 GW: gordon.wiegler@stud.uni-goettingen.de

16 FK: felix.kaufholz@uni-goettingen.de

17 NP: nposnie@gwdg.de

18 **Abbreviations:** after egg laying (AEL), first larval stage (L1), 2nd larval stage (L2), third larval  
19 stage (L3), Hunchback (Hb), morphogenetic furrow (MF)

20

## 21 **Abstract**

22 The development of different cell types must be tightly coordinated in different organs. The  
23 developing head of *Drosophila melanogaster* represents an excellent model to study the molecular  
24 mechanisms underlying this coordination because the eye-antennal imaginal discs contain the  
25 organ anlagen of nearly all adult head structures, such as the compound eyes or the antennae.  
26 We studied the genome wide gene expression dynamics during eye-antennal disc development  
27 in *D. melanogaster* to identify new central regulators of the underlying gene regulatory network.  
28 Expression based gene clustering and transcription factor motif enrichment analyses revealed a  
29 central regulatory role of the transcription factor Hunchback (Hb). We confirmed that *hb* is  
30 expressed in two polyploid retinal subperineurial glia cells (carpet cells). Our functional analysis  
31 shows that Hb is necessary for carpet cell development and loss of Hb function results in abnormal  
32 glia cell migration and photoreceptor axon guidance patterns. Additionally, we show for the first  
33 time that the carpet cells are an integral part of the blood-brain barrier.

## 34 **Keywords:**

35 *Drosophila melanogaster*, RNA-seq, transcriptomics, gene expression, Hunchback, Hb, eye-  
36 antennal imaginal disc, eye development, glia, axon guidance, blood-brain barrier, cell migration,  
37 polyploidy, endoreplication

38

## 39 Introduction

40 The development of complex organs is often accompanied by extensive cell- and tissue  
41 rearrangements. In some extreme cases, initially simple cells undergo profound morphological  
42 changes such as extensive cell fusions of muscle precursor cells to form syncytial muscle fibers  
43 (Rochlin et al. 2010). In the insect nervous system, for example, initially uniform neuroectodermal  
44 cells first invaginate, divide following a very defined pattern and eventually undergo morphological  
45 differentiation to give rise to highly polarized neurons with long axon projections and shorter  
46 dendrites (Skeath and Thor 2003; Reichert 2011). Other cell types, such as germ cells first migrate  
47 long distances before coming to rest in the developing gonads (Richardson and Lehmann 2010).  
48 Although these cell-type specific processes need to be tightly controlled and coordinated with  
49 those of other cell types of the same and neighboring organs, the molecular mechanisms involved  
50 are still poorly understood. The development of the adult *Drosophila melanogaster* head and the  
51 visual system has been proven to be an excellent model to study the coordination of different  
52 developmental processes (Atkins and Mardon 2009; María Domínguez and Casares 2005;  
53 Fernando Casares and Almudi 2016; Wolff and Ready 1991; J E Treisman and Heberlein 1998;  
54 Jessica E. Treisman 2013).

55 The adult *D. melanogaster* head is composed of the compound eyes (the main visual system), the  
56 three dorsal ocelli, the antennae, the ventral mouthparts and the head capsule that connects these  
57 organs and encloses the brain (Snodgrass 1935). Most of these structures develop during larval  
58 stages from eye-antennal imaginal discs, which originate from about 20 cells that are specified by  
59 *eyeless* (*ey*) expression at embryonic stages (Cohen 1993; Garcia-Bellido and Merriam 1969;  
60 Quiring et al. 1994). Throughout larval development, the eye-antennal discs grow extensively by  
61 cell proliferation resulting in discs composed of more than 15,000 cells at the beginning of pupation  
62 (Kenyon et al. 2003; Fernando Casares and Almudi 2016). During the first two larval stages, the  
63 initially uniform disc is subdivided into an anterior antennal and a posterior retinal compartment by

64 the action of the two opposing gradients of the morphogens Wingless (Wg) and Decapentaplegic  
65 (Dpp), which subsequently activate genes responsible for antennal development (F Casares and  
66 Mann 1998; P. D. Dong, Chu, and Panganiban 2000) and the retinal determination genes (Cho et  
67 al. 2000; Chen et al. 1999; Cheyette et al. 1994; Kango-Singh, Singh, and Sun 2003; Mardon,  
68 Solomon, and Rubin 1994; Serikaku and O'Tousa 1994; Shen and Mardon 1997; Kenyon et al.  
69 2003), respectively. Approximately at the same time when the retinal part of the disc and the  
70 antennal region separate during the early L2 stage, the ventral portion of the antennal part that  
71 gives rise to the maxillary palp is marked by expression of the Hox gene *Deformed (Dfd)*. This  
72 subdivision within the antennal region is established by delayed expression of *wg* in the Anlagen  
73 of the maxillary palps (Lebreton et al. 2008; V. K. Merrill et al. 1989; Anais Tiberghien et al. 2015).

74 Once the eye-antennal disc is subdivided into the different organ precursors, cells within each  
75 compartment start to differentiate at L2/early L3 stages. In the retinal region, a differentiation wave  
76 that is established in the posterior most part of the equator region moves anteriorly. This wave is  
77 accompanied by a morphologically visible indentation, the so-called morphogenetic furrow (MF)  
78 (Heberlein and Treisman 2000). Progression of the MF is mediated by Dpp-signaling within the  
79 furrow and Hh-signaling from the posterior disc margin (María Domínguez and Hafen 1997;  
80 Heberlein et al. 1995; J E Treisman and Heberlein 1998). Hh activated *atonal (ato)* expression in  
81 the region of the MF becomes restricted to regularly spaced single cells posterior to the furrow (M  
82 Domínguez 1999; María Domínguez and Hafen 1997). Those cells are destined to become R8  
83 photoreceptors, which subsequently recruit R1-R7 photoreceptors and associated cell types, such  
84 as cone and pigment cells from the surrounding cells (N E Baker and Yu 2001; Jarman et al. 1994;  
85 Jarman et al. 1995).

86 The axons of successively forming photoreceptor cells need to be connected to the optic lobes to  
87 allow a functional wiring of the visual system with the brain. All axons are collected at the basal  
88 side of the eye-antennal disc and guided through the optic stalk throughout the L3 stage. This



89 process is supported by retinal glia cells, which originate mainly by proliferation from 6-20 glia  
90 cells located in the optic stalk prior to photoreceptor differentiation (Silies et al. 2007; R  
91 Rangarajan, Gong, and Gaul 1999; Choi and Benzer 1994). These retinal glia cell types include  
92 migratory surface glia (including perineurial and subperineurial glia cells) and wrapping glia.  
93 Triggered by the presence of developing photoreceptor cells, the retinal glia cells enter the eye-  
94 antennal disc through the optic stalk and migrate towards the anterior part of the disc, always  
95 remaining posterior to the advancing morphogenetic furrow (R Rangarajan, Gong, and Gaul 1999;  
96 Choi and Benzer 1994; Silies et al. 2007). When photoreceptors differentiate, the contact of their  
97 growing axons with perineurial glia cells triggers the reprogramming of these glia cells into  
98 differentiated wrapping glia, which extend their cell membranes to ensheath bundles of axons that  
99 project to the brain lobes through the optic stalk (Franzdóttir et al. 2009; Silies et al. 2007; Hummel  
100 et al. 2002). The basally migrating perineurial glia cells and the wrapping glia ensheathed  
101 projecting axons are separated by two large polyploid carpet cells, each of them covering half of  
102 the retinal field (Silies et al. 2007). The two carpet cells form septate junctions and express the G  
103 protein-coupled receptor (GPCR) encoded by the *moody* locus, both characteristics of the  
104 subperineurial surface glia type (Bainton et al. 2005; Silies et al. 2007). While subperineurial glia  
105 cells located in the brain remain there to form the blood-brain barrier, the carpet cells are thought  
106 to originate in the optic stalk (Choi and Benzer 1994), and during L2 and early L3 stages they  
107 migrate into the eye-antennal disc. Later during pupal stages, they migrate back through the optic  
108 stalk to remain beneath the lamina neuropil in the brain. However, so far it is not known, whether  
109 carpet cells or other retinal glia cell types eventually contribute to the formation of the blood-eye  
110 barrier, the retinal portion of the blood-brain barrier (T. N. Edwards et al. 2012; T. N. Edwards and  
111 Meinertzhagen 2010). The carpet cells thus share features of subperineurial glia, but their  
112 extensive migratory behavior and their function in the eye-antennal disc suggest that these cells  
113 may exhibit distinct cellular features. However, so far, no carpet cell specific regulator has been  
114 identified that may be involved in specifying carpet cell fate.

115 Although eye-antennal disc growth and patterning, and especially retinal determination and  
116 differentiation, are among the most extensively studied processes in *D. melanogaster*, a  
117 systematic understanding of involved genes and their potential genetic and direct interactions is  
118 limited to the late L3 stage in the context of retinal differentiation (Aerts et al. 2010; Naval-Sánchez  
119 et al. 2013; Potier et al. 2014). Similarly, recent attempts to incorporate existing functional and  
120 genetic data into a gene regulatory network context covers mainly retinal determination and  
121 differentiation processes (Koestler et al. 2015). So far, a comprehensive profiling of gene  
122 expression dynamics throughout eye-antennal disc development is missing. The same holds true  
123 for the molecular control of retinal glia cell development. While the transcriptome of adult surface  
124 glia in the brain has been analyzed (DeSalvo et al. 2014), retinal glia cells have not been  
125 comprehensively studied yet.

126 Here we present a dynamic genome wide expression analysis of *D. melanogaster* eye-antennal  
127 disc development covering late L2 to late L3 stages. We show that the transition from patterning  
128 to differentiation is accompanied by extensive remodeling of the transcriptional landscape.  
129 Furthermore, we identified central transcription factors that are likely to regulate a high number of  
130 co-expressed genes and thus key developmental processes in the different organ anlagen defined  
131 in the eye-antennal disc. One of these central factors is the C2H2 zinc-finger transcription factor  
132 Hunchback (Hb) (Tautz et al. 1987) that has been extensively studied in *D. melanogaster* during  
133 early axis determination and segmentation (Lehmann and Nüsslein-Volhard 1987; Nüsslein-  
134 Volhard and Wieschaus 1980). It is also well-known for its role in the regulation of temporal  
135 neuroblast identity during embryogenesis, as it determines first-born identity in the neural lineage  
136 (Grosskortenhaus et al. 2005; Isshiki et al. 2001). Here we show for the first time that *hb* is  
137 expressed in carpet cells and loss of function experiments suggest that its activity is necessary for  
138 carpet cell formation and consequently for proper axon guidance and blood-brain barrier integrity.  
139 Eventually, we reveal putative Hb target genes and confirm that bioinformatically predicted targets  
140 are indeed expressed in developing carpet cells.



## 142 **Results**

### 143 **Differential gene expression and co-expressed genes during *D. melanogaster* head** 144 **development**

145 Although compound eye development and retinal differentiation are among the most intensively  
146 studied processes in *D. melanogaster*, a comprehensive understanding of the underlying gene  
147 expression dynamics is still missing to date. To identify the genes expressed during *D.*  
148 *melanogaster* eye-antennal disc development and their expression dynamics, we performed RNA-  
149 seq on this tissue at three larval stages covering the process of retinal differentiation that is marked  
150 by the progression of the morphogenetic furrow. The late L2 stage (72h after egg laying, AEL)  
151 represents the initiation of differentiation, at mid L3 stage (96h AEL) the morphogenetic furrow is  
152 in the middle of the retinal field and the late L3 stage (120h AEL) represents the end of  
153 morphogenetic furrow progression. Multidimensional scaling clustering clearly indicated that the  
154 largest difference in gene expression (dimension 1) was between L2 eye-antennal discs (72h AEL)  
155 and L3 eye-antennal discs (96h and 120h AEL) (Figure S1).

156 After filtering out not expressed and very lowly expressed genes, we observed that 9,194 genes  
157 were expressed at least in one of the three sequenced stages. As anticipated by the  
158 multidimensional scaling plot (Figure S1), the number of genes that changed their expression  
159 between 72h AEL and 96h AEL was much larger than between 96h AEL and 120h AEL, (Table  
160 S1). In only 24 hours, during the transition from L2 to L3, 60% of the expressed genes changed  
161 their expression significantly. In the transition from mid L3 to late L3, in contrast, only 22% of the  
162 genes underwent a change in their expression.

163 In order to better characterize the different expression dynamics of the expressed genes, we  
164 performed a co-expression clustering analysis based on Poisson Mixture models (Rau et al. 2015).  
165 Manual comparison of the different outputs showed that the 13 clusters predicted by one of the

166 models (Djump, (Baudry et al. 2012)) were non-redundant and sufficiently described all the  
167 expression profiles present in the data. A total of 8,836 genes could be confidently placed in one  
168 of these clusters (maximum a posteriori probability (MAP) > 99%). We ordered the predicted 13  
169 clusters according to their expression profile (Figure 1): four clusters contained clearly early  
170 expressed genes, two of them contained genes expressed only at 72h AEL (cluster 1 and 2) and  
171 two contained genes predominantly expressed early, but also with low expression at 96h and/or  
172 120h AEL (clusters 3 and 4); one cluster showed down-regulation at 96h AEL, but a peak of  
173 expression again at 120h AEL (cluster 5); the genes in the largest clusters showed almost constant  
174 expression throughout the three stages (clusters 6 and 7); one cluster showed constant  
175 expression at 72h AEL and 96h AEL and down-regulation at 120h AEL (cluster 8); one cluster  
176 showed a peak of expression at 96h AEL (cluster 9) and four clusters contained genes with  
177 predominantly late expression, one with high and constant expression at 96h AEL and 120h AEL  
178 (cluster 10), two with up-regulation in both transitions (cluster 11 and cluster 12) and one with  
179 genes expressed only at 120h AEL (cluster 13).

180 A GO enrichment analysis for the genes in the individual clusters showed that the genome-wide  
181 co-expression profiling and subsequent ordering of the clusters recapitulated the consecutive  
182 biological processes that take place during eye-antennal disc development with a great resolution  
183 (Figure 1, Table S2). For instance, we found genes related to energy production mainly in clusters  
184 2 and 3, while genes more specific for terms related to mitosis and cell cycle were found in clusters  
185 4, 8 and 9, where genes have higher relative expression at 96h AEL than 72h AEL. Similarly,  
186 cluster 10 contained the more general term “imaginal disc development”, while cluster 12 showed  
187 enrichment for “compound eye morphogenesis”, and cluster 13 was the only with enriched terms  
188 related to pupation processes and pigmentation. Although we sequenced the entire eye-antennal  
189 discs, we found many GO terms related to eye development with high enrichment scores, while  
190 very few GO terms specific for antenna and maxillary palps were observed (e.g. in cluster 12 “eye  
191 development” appears with  $p=4.38e-24$ , “antennal development” with  $p=4.37e-08$  and no GO

192 terms related to maxillary palps were found) (Table S2). However, many GO terms related to leg  
193 formation and proximodistal pattern formation were highly enriched in the genes in cluster 9  
194 (“proximodistal pattern formation” with  $p=4.48e-05$ ), cluster 10 (“leg disc development” with  
195  $p=7.85e-20$ ) and cluster 12 (“leg disc development” with  $p=4.32e-12$ ) (Table S2). The assignment  
196 of all expressed genes to their corresponding cluster is available along with the GEO submission  
197 number GSE94915.

198 In summary, we showed that clusters with early expressed genes mainly represent metabolic and  
199 energy related processes, while clusters with late expressed genes represent more organ specific  
200 differentiation and morphogenetic processes.

## 201 **Transcription factors regulating *D. melanogaster* head development**

202 The co-expression of genes observed in the 13 clusters may be a result of co-regulation by the  
203 same transcription factors or combinations thereof. In order to test this hypothesis and to reveal  
204 potential central upstream regulators, we used the i-cis Target method (Herrmann et al. 2012) to  
205 search for enrichment of transcription factor binding sites in the regulatory regions of the genes  
206 within each of the 13 clusters (Figure 1, Table S3). As basis for this enrichment analysis various  
207 experimental ChIP-chip and ChIP-seq datasets were used, namely those published by the  
208 modENCODE Consortium (Celniker et al. 2009), the Berkeley *Drosophila* Transcription Network  
209 Project (X. Li et al. 2008) and by the Furlong Lab (Zinzen et al. 2009; Junion et al. 2012).

210 One of the most noticeable results of the statistical ranking analysis was that genes in 9 of the 13  
211 clusters showed significant enrichment for Nejire binding sites (Figure 1). Nejire (also known as  
212 CREB-binding protein (CBP)) is a co-factor already known to be involved in many processes of  
213 eye development and patterning (Justin P Kumar et al. 2004). Similarly, Pannier that has been  
214 shown to play at least two important roles during eye-antennal disc development (Singh et al.

215 2005; Singh and Choi 2003; Oros et al. 2010) was found enriched to regulate the genes of many  
216 clusters (clusters 2, 4, 6, 7, 8, 9 and 11).

217 Besides these highly abundant transcription factors, the clusters with genes predominantly  
218 expressed at later stages were also enriched for transcription factors already known to play a role  
219 in eye-antennal disc development. For instance, a significant number of Sloppy-paired 1 (Slp1)  
220 target genes are up-regulated at L3 stage (cluster 12) and this transcription factor is known to play  
221 a critical role in establishing dorsal-ventral patterning of the eye field in the eye-antennal disc (Sato  
222 and Tomlinson 2007). A function of Daughterless (identified in cluster 13) is also described: it is  
223 expressed in the morphogenetic furrow, it interacts with Atonal and is necessary for proper  
224 photoreceptor differentiation (Brown et al. 1996). Finally, Snail (enriched in cluster 1 and 13) and  
225 Twist (enriched in cluster 12) were previously identified as possible repressors of the retinal  
226 determination gene *dachshund* (*dac*) (Anderson, Salzer, and Kumar 2006) and our results could  
227 indicate that they regulate also other genes during eye-antennal disc development.

228 Cluster 5 contained genes that show a peak in expression at 72h AEL and 120h AEL stages,  
229 which precede major stage transitions from L2 to L3 and from L3 to pupa stage, respectively.  
230 These transitions are characterized by ecdysone hormone pulses before larval molting and  
231 pupation (T. Li and Bender 2000). Intriguingly, the only potential transcription factor binding site  
232 that was significantly enriched was that of the Ecdysone Receptor (EcR), that has been shown to  
233 be expressed in the eye-antennal disc in the region of the progressing morphogenetic furrow  
234 (Brennan et al. 1998).

235 The identification of many well-known transcription factors suggests that the applied clustering  
236 approach indeed allows identifying key regulators of various processes taking place throughout  
237 eye-antennal disc development. Interestingly, we identified a few generally well-known upstream  
238 factors for which a potential role during eye-antennal disc development has not yet been  
239 described. For instance, in clusters of very early expressed genes, we found an enrichment of

240 motifs for the transcription factor Caudal (Cad) (cluster 1 and 2) and the Hox protein Fushi tarazu  
241 (Ftz) (cluster 1). The MADS-box transcription factor Myocyte enhancer factor 2 (Dmef2) was  
242 predicted to regulate genes found in clusters 2, 4 and 12 (Figure 1). Using two independent  
243 *Dmef2*-Gal4 lines to drive GFP expression, we confirmed expression of *Dmef2* in loose cells  
244 attached to the developing eye-antennal discs (Figure S2). Eventually, we found an enrichment  
245 of potential target genes of the C2H2 zinc-finger transcription factor Hunchback (Hb) in clusters  
246 12 and 13, which are active mainly during mid and late L3 stages. Since GO terms enriched in  
247 these two clusters suggested an involvement in retinal development or neurogenesis (Figure 1),  
248 we examined a potential function of Hb in the eye-antennal disc in more detail.

#### 249 ***hb* is expressed in retinal subperineurial glia cells**

250 Using *in-situ* hybridization we found *hb* expression in two cell nuclei at the base of the optic stalk  
251 in the posterior region of late L3 eye-antennal discs (Figure 2A). With a Hb antibody we also  
252 detected the Hb protein in these two basally located nuclei (Figure 2B). DNA staining with DAPI  
253 showed that the Hb-positive nuclei are bigger than those of surrounding cells, suggesting that they  
254 are polyploid. Additionally, we tested two putative Gal4 driver lines obtained from the Vienna Tile  
255 library (Pfeiffer et al. 2008) (VT038544; Figure 2C and VT038545; Figure S3). Both lines drove  
256 reporter gene expression in the two polyploid nuclei as described above. Note that both lines also  
257 drove the typical *hb* expression in the developing embryonic nervous system, but not the early  
258 anterior expression (Jiménez and Campos-Ortega 1990; Kambadur et al. 1998) (not shown). The  
259 regulatory region covered by the two Gal4 driver lines is located at the non-coding 3' end of the  
260 *hb* locus accessible to DNA-binding proteins at embryonic stages 9 and 10 (X. Li et al. 2008)  
261 (Figure S4), a time when early-born neuroblasts express *hb* (Grosskortenhaus et al. 2005). The  
262 lack of the early anterior expression may be explained by the fact that the DNA region covered by  
263 the driver lines does not seem to be bound by Bicoid during early embryonic stages (X. Li et al.



264 2008) (Figure S4). Based on these findings, we are confident that the regions covered by the two  
265 Gal4 driver lines (VT038544 and VT038545) recapitulate native *hb* expression.

266 The basal location of the *hb*-positive cells suggests that they may be retinal glia cells. Co-  
267 expression of *hb* with the pan-glial marker Repo (Figure 3A) further supported this suggestion.  
268 Previous data has shown that two polyploid retinal subperineurial glia cells (also referred to as  
269 carpet cells) cover the posterior region of the eye-antennal disc (Choi and Benzer 1994; Silies et  
270 al. 2007). In order to test, whether *hb* may be expressed in carpet cells, we first investigated the  
271 expression of the subperineurial glia marker Moody (Schwabe et al. 2005) and we found a clear  
272 co-localization with Hb (Figure 3B).

273 Carpet cells migrate through the optic stalk into the eye-antennal disc during larval development  
274 (Choi and Benzer 1994; Silies et al. 2007). Therefore, we followed the expression of the *hb* driver  
275 lines throughout late L2 and L3 larval stages (Figure 4). Already at the L2 stage, we could easily  
276 recognize the *hb*-positive cell nuclei by their large size (Figure 4A, A'). We could corroborate that  
277 these cells indeed migrated through the optic stalk during late L2 and early L3 stages (Figure 4A,  
278 B), and then entered the disc and remained basally in the posterior region of the disc, flanking the  
279 optic stalk (Figure 4C, C''). As previously observed for carpet cells (Silies et al. 2007), we never  
280 found *hb*-positive cell nuclei in the midline of the retinal field.

281 Taken together, these data show that *hb* is expressed in two polyploid retinal subperineurial glia  
282 cells (carpet cells) that enter the basal surface of the eye-antennal disc through the optic stalk  
283 during larval development.

## 284 **Hb function is necessary for the presence of polyploid carpet cells in the** 285 **eye-antennal disc**

286 The expression of *hb* in carpet cells suggested an involvement in their development. To test this  
287 hypothesis, we examined loss of Hb function phenotypes based on RNA interference (RNAi)

288 driven specifically in subperineurial glia cells (*moody*-Gal4 driving UAS-*hb*<sup>dsRNA</sup>). Of four tested  
289 UAS-*hb*<sup>dsRNA</sup> lines we used the most efficient line (see Materials and Methods) for the RNAi knock-  
290 down experiments. Additionally, we investigated eye-antennal discs of a temperature sensitive  
291 mutant (Hb<sup>TS</sup>) (Bender, Turner, and Kaufman 1987). Since Hb is necessary during embryogenesis  
292 (Nüsslein-Volhard and Wieschaus 1980; Lehmann and Nüsslein-Volhard 1987), the analyzed flies  
293 were kept at 18°C during egg collection and throughout embryonic development, and they were  
294 only transferred to the restrictive temperature of 28°C at the L1 stage. Carpet cell nuclei were  
295 identified by  $\alpha$ -Repo staining because of their large size and their specific position (Figure 5A; see  
296 also Figure 4B' and 4C').

297 The most common phenotype observed in late L3 eye-antennal discs of RNAi and mutant flies  
298 was the absence of one or both carpet cell nuclei (Figure 5A-C). In wild type animals, we could  
299 unambiguously identify two carpet cell nuclei in 72% of the eye-antennal discs. In 21% of the  
300 analyzed discs, we found only one carpet cell nucleus (Figure 5D). In contrast, in 35% to 40% of  
301 the studied Hb loss of function discs only one carpet cell nucleus was observed (Figure 5B and  
302 D). In some cases, this single polyploid Repo-positive nucleus was located in the midline of the  
303 retinal field (Figure 5B). No carpet cell nuclei could be observed in 24% and 38% of the eye-  
304 antennal discs originating from *moody*>>*hb*<sup>dsRNA</sup> and Hb<sup>TS</sup> flies, respectively (Figure 5C and D).  
305 Note that we obtained comparable results when we expressed the *hb* dsRNA in all glia cells  
306 (*repo*>>*hb*<sup>dsRNA</sup>; not shown) or only in subperineurial glia cells (*moody*>>*hb*<sup>dsRNA</sup>).

307 To identify larval stages at which Hb function is crucial for carpet cell development, we transferred  
308 Hb<sup>TS</sup> flies to the restrictive temperature of 28°C at 24h AEL (early L1 stage), at 48h AEL (late L1),  
309 at 72h AEL (late L2) or 96h AEL (mid L3 stage) and assessed the presence of polyploid Repo-  
310 positive carpet cell nuclei in late L3 eye-antennal discs, respectively. In all cases, we found a  
311 significant reduction of the number of carpet cell nuclei when compared to control discs (Figure  
312 5E). Although no clear significant differences in the number of carpet cells was detected between

313 the consecutive experiments (Figure S5), our results show that Hb function is necessary for the  
314 presence of polyploid carpet cell nuclei throughout larval development.

### 315 **Loss of Hb function affects retinal glia cell migration and axon guidance**

316 The observed loss of polyploid carpet cell nuclei could be a result of either the loss of the entire  
317 carpet cells, incomplete migration into the eye-antennal disc or loss of the polyploidy. To  
318 distinguish between these options, we tested whether also the carpet cell membranes were  
319 affected upon loss of *hb* expression, in addition to the polyploid nuclei. To this aim, we expressed  
320 *hb<sup>dsRNA</sup>* specifically in subperineurial glia cells with a *moody*-Gal4 driver line together with a strong  
321 membrane marker (20xUAS-mCD8::GFP) to label the extensive carpet cell membranes (Figure  
322 6).

323 In control discs (*moody*>>20xmCD8::GFP) the two carpet cell membranes spanned the entire  
324 posterior region of the eye-antennal disc from the optic stalk to the morphogenetic furrow (Figure  
325 6A). In contrast, in some of the knock-down (*moody*>>20xmCD8::GFP; *moody*>>*hb<sup>dsRNA</sup>*) eye-  
326 antennal discs with no clear polyploid carpet cell nuclei, we detected *moody*-positive membranes  
327 that remained in the optic stalk and did not span the entire retinal field of the eye-antennal disc  
328 (Figure 6B). In cases where one clear carpet cell nucleus was observed, the location of *moody*-  
329 positive cell membranes in eye-antennal discs depended on the location of the remaining nucleus.  
330 If the nucleus was located on one side of the eye-antennal disc, we observed *moody*-positive  
331 membranes more unilaterally (Figure 6C), while the membrane was present in the center of the  
332 disc if the polyploid nucleus was located centrally (Figure 6D).

333 It has been shown that the extensive cell bodies of carpet cells provide a scaffold for other retinal  
334 glia cells that migrate into the eye-antennal disc, pick up differentiating photoreceptor axons and  
335 guide them through the optic stalk into the optic lobe (Choi and Benzer 1994; R Rangarajan, Gong,  
336 and Gaul 1999). In accordance with this known function, we observed irregular and patchy

337 patterns of Repo-positive cells in late L3 Hb loss of function eye-antennal discs, suggesting  
338 impaired glia cell migration into the eye-antennal disc (compare Figure S6B to S6A). Additionally,  
339 we used HRP staining to visualize axon projections in late L3 eye-antennal discs. While axonal  
340 tracts were regular in control eye-antennal discs, we found unorganized axon projections upon  
341 loss of *hb* expression (compare Figure S6B' to S6A').

#### 342 **Loss of Hb function results in blood-brain barrier defects**

343 Subperineurial glia cells cover the entire surface of the brain from larval stages onwards. They are  
344 an integral part of the protective blood-brain barrier by establishing intercellular septate junctions  
345 (Carlson et al. 2000). The blood-brain barrier prevents the substances that circulate in the  
346 hemolymph to enter the brain and helps maintaining the proper homeostatic conditions of the  
347 nervous system (J. S. Edwards, Swales, and Bate 1993). Since it has been shown that the carpet  
348 cells migrate through the optic stalk towards the brain during pupal stages (T. N. Edwards et al.  
349 2012), we tested, whether the loss of *hb* expression in developing carpet cells had an effect on  
350 the integrity of the blood-brain barrier.

351 To this aim, we injected fluorescently labeled dextran into the abdomen of *moody>>hb<sup>dsRNA</sup>* adult  
352 flies and scored the presence of this dye in the retina of the flies. Animals with a properly formed  
353 blood-brain barrier showed a fluorescent signal in their body, but not in the retina (Figure 7A).  
354 However, in animals that had an incomplete blood-brain barrier, the dextran penetrated into the  
355 retina and fluorescence was observed in the compound eyes (Figure 7A'). Since it is known that  
356 blood-brain barrier permeability can increase after exposure to stress conditions (H. S. Sharma  
357 and Dey 1986; Skultétyová, Tokarev, and Jezová 1998), we only scored animals that survived  
358 24h after the injection of dextran. In most cases, the two eyes of an individual presented different  
359 fluorescent intensities, and even no fluorescence in one eye but strong signal in the other.  
360 Therefore, we scored each eye separately. *moody>>hb<sup>dsRNA</sup>* flies had a significantly higher rate of

361 fluorescent retinas ( $p = 8.08e-7$ ,  $\chi^2$  test), indicating that their eyes were not properly isolated from  
362 the hemolymph circulating in the body cavity (Figure 7B).

363 In summary, our loss of function experiments further confirmed a central role of Hb in carpet cell  
364 development. Besides impaired retinal glia cell migration and axon guidance, we showed that  
365 upon loss of Hb function also the blood-brain barrier integrity is disrupted.

### 366 **Expression of putative Hb target genes in eye-antennal discs**

367 Since we have identified Hb because of an increase in expression of its target genes during 96h  
368 and 120h AEL stages and *hb* itself is only expressed in carpet cells, we also investigated, whether  
369 some of the targets were expressed in these cells. Using available ChIP-chip data for Hb from the  
370 Berkeley *Drosophila* Transcription Network Project (BDTNP) (X. Li et al. 2008), we generated a  
371 high confidence list of 847 putative Hb target genes (see Materials and Methods for details), of  
372 which 585 were expressed in eye-antennal discs at least in one of the studied stages. More  
373 precisely, we found that 267 of these genes were differentially expressed in the transition from  
374 72h to 96h AEL and only 52 were differentially expressed between 96h and 120h AEL (Figure 8,  
375 Table S4). In both cases, most of these genes were up-regulated, suggesting that Hb mainly  
376 activates target gene expression in the eye-antennal disc. Focusing only on those target genes  
377 that resulted in the identification of Hb in our clustering approach (see above), we found that 77  
378 of the 585 expressed putative Hb targets were present in clusters 12 and 13. We searched the  
379 GO terms for biological functions of these 77 genes and found that 17 code for transcription factors  
380 and up to 25 code for proteins integral to the cell membrane. A number of GO terms were related  
381 to neuronal development and eye development and to note is the presence of genes known to be  
382 related to glia cell migration and endoreduplication (Table S5).

383 Based on their annotated GO terms, predicted or known cellular location and the availability of  
384 driver lines and antibodies, we selected 13 of these target genes and tested if they were expressed

385 in carpet cells at 120h AEL. For 8 out of the 13 selected targets we found no clear expression  
386 related to carpet cells (*archipelago (ago)*, *Delta (Dl)*, *knirps (kni)*, *rhomboid (rho)*, *roundabout 3*  
387 (*robo3*), *Sox21b*, *Src oncogene at 64B (Src64B)* and *thickveins (tkv)*, not shown). This could be  
388 because they were false positives, but they could also be expressed at earlier stages than  
389 analyzed here or the used driver constructs did not include the regulatory regions to drive  
390 expression in carpet cells. *brinker (brk)*, *Cadherin-N (CadN)*, *cut (ct)*, *Fasciclin 2 (Fas2)* and  
391 *sprouty (sty)* showed expression in carpet cells (Figure 9). *brinker (brk)* was ubiquitously  
392 expressed in the eye-antennal disc (not shown). Although we could only observe expression in  
393 one of the two cells in every eye-antennal disc we analyzed, *CadN* is clearly expressed in carpet  
394 cells (Figure 9A). Recent data demonstrated that *CadN*, a Ca<sup>+</sup> dependent cell adhesion molecule,  
395 is necessary for the proper collective migration of glia cells (A. Kumar et al. 2015), a key feature  
396 of carpet cells. As it has previously been published, *cut* is expressed in subperineurial glia cells  
397 (Figure 9B) (Bauke et al. 2015). The *Cut* protein is present in carpet cells already at L2 stage and  
398 remains until late L3 stage (Figure 9B, earlier stages not shown). It has been shown that *Cut* is  
399 necessary for proper wrapping glia differentiation and to correctly form the large membrane  
400 processes that these cells form (Bauke et al. 2015). Interestingly, carpet cells have a similar  
401 morphology, with very large membrane surface and extensive processes that reach to the edge  
402 of the retinal field. In contrast, retinal perineurial glia do not have this morphology and do not  
403 express *cut*. Also, *Fas2* (Figure 9C) and *sty* (Figure 9D) were clearly expressed in carpet cells as  
404 well as in several other cells in the eye-antennal disc. *Sty* and *Fas2* are negative regulators of the  
405 EGFR signaling pathway that is involved in retinal glia cell development and photoreceptor  
406 differentiation (Sieglitz et al. 2013; Jarvis 2006; Bogdan and Klämbt 2001; Kim and Bar-Sagi 2004;  
407 Kramer et al. 1999; Mao and Freeman 2009).

408 In summary, we showed that 5 of the 13 computationally predicted Hb target genes that we tested,  
409 were expressed in carpet cells, suggesting that our bioinformatic pipeline allows the identification  
410 of new potential regulators of carpet cell development.



## 412 **Discussion**

### 413 **Expression dynamics and clustering recapitulates developmental processes**

414 Although compound eye development is one of the most extensively studied processes in *D.*  
415 *melanogaster*, a comprehensive understanding of genome wide gene expression dynamics is still  
416 missing. We performed a genome wide expression study of eye-antennal discs from three larval  
417 stages representing late patterning processes and the onset of differentiation (late L2, 72h AEL),  
418 differentiation progression (mid L3, 96h AEL) and the completion of the differentiation wave  
419 (wandering L3, 120h AEL).

420 Our data showed that 9,194 of all annotated *D. melanogaster* genes are expressed in the  
421 developing eye-antennal disc. We found extensive remodeling of the transcriptomic landscape  
422 with 60% of all expressed genes significantly changing their expression profile during the transition  
423 from late L2 stages to mid L3 stages. It has been shown that early eye-antennal disc stages are  
424 mainly characterized by patterning processes that are necessary to subdivide the initially uniform  
425 disc into the organ anlagen for the antennae, the maxillary palps, the compound eyes, the dorsal  
426 ocelli and the head cuticle (V. K. L. Merrill, Turner, and Kaufman 1987; Pichaud and Casares  
427 2000; Baonza and Freeman 2002; Aguilar-Hidalgo et al. 2013; Cho et al. 2000; Lebreton et al.  
428 2008; María Domínguez and Casares 2005; Kenyon et al. 2003). Within organ-specific domains,  
429 further patterning processes define for instance the dorsal ventral axis in retinal field (Cavodeassi  
430 et al. 1999; Yang, Simon, and McNeill 1999; Oros et al. 2010) or the proximal-distal axis of the  
431 antennae (Morata 2001). Additionally, the discs grow extensively throughout L1 and L2 stages  
432 mainly by cell proliferation (J P Kumar and Moses 2001; Kenyon et al. 2003). With our data, we  
433 provide a first glimpse of the gene expression dynamics underlying this fundamental change from  
434 predominantly patterning and proliferation processes to the onset of differentiation. Accordingly,  
435 the genes active at the late L2 stage were mostly involved in metabolic processes and generation



436 of energy. At the end of L2 stages, the patterning processes are mostly concluded and  
437 differentiation starts within each compartment. For instance, in the retinal field the progression of  
438 the differentiation wave is accompanied by a reduction in cell proliferation (Wolff and Ready 1991;  
439 Jessica E. Treisman 2013). Therefore, mostly genes related to cell differentiation, nervous system  
440 development, pattern specification and compound eye development were significantly up-  
441 regulated at the mid L3 stage.

442 On the level of transcriptome dynamics, the transition from the mid L3 stage to late L3 was less  
443 pronounced, since only 22% of the expressed genes changed their expression. Interestingly, in  
444 this transition again genes related to metabolism and energy production were down-regulated.  
445 This can be explained by the fact that at 96h AEL the disc has not yet reached its final size, and  
446 cells anterior to the morphogenetic furrow still proliferate (Jessica E. Treisman 2013). Also, directly  
447 behind the morphogenetic furrow one last synchronous cell division takes place to give rise to the  
448 last cells of the photoreceptor clusters (R1, R6 and R7) (Baonza and Freeman 2002; Jessica E.  
449 Treisman 2013). In the light of an ongoing differentiation, the GO terms of genes active at the late  
450 L3 stage were also similar to those enriched in the transition from late L2 to mid L3. However, in  
451 this case some terms related to later processes were obtained such as R7 cell differentiation or  
452 pigment metabolic process, processes taking place late during eye-antennal disc development  
453 (Jessica E. Treisman 2013).

454 The discrepancy between the number of differentially expressed genes in the two studied  
455 transitions may in part also be because only female discs were analyzed between 96h and 120h  
456 AEL, while we compared mixed males and females at 72h AEL with only females at 96h AEL  
457 during the first transition. Since about one third of all genes in *D. melanogaster* show signs of sex-  
458 specific expression (Daines et al. 2011), the differentially expressed genes in the first transition  
459 may also include some male or female biased genes. This dataset could be an excellent starting  
460 point for a comprehensive genome wide analysis of sex-specific gene expression during head

461 development because it has been shown that a strong sexual dimorphism in eye size and head  
462 shape exists in *D. melanogaster* (Posnien et al. 2012).

463 Our clustering of expressed genes based on their dynamic expression profiles resulted in 13 non-  
464 redundant clusters (Figure 1), which represent a much more defined representation of the dynamic  
465 expression changes during eye-antennal disc development. For example, cluster 7 grouped genes  
466 that were similarly high expressed at 72h and 96h AEL, and their expression decreases at 120h  
467 AEL. The known genes in this cluster have been described to be related to DNA replication and  
468 cell cycle control (Table S2), which corresponds with the fact that active proliferation takes place  
469 at these stages (Baonza and Freeman 2002). Thus, other genes that were grouped in this cluster,  
470 but for which no previous knowledge is available, are likely also related to these biological  
471 functions. Similarly, genes up-regulated in the later stages were separated in more specific  
472 clusters, and most of the enriched GO terms are related to differentiation and neuron and eye  
473 development. Members of well-known developmental signaling pathways such as EGFR, Notch  
474 and cell cycle related genes (e.g. *CycE*) were present in cluster 9 that grouped genes with similarly  
475 high expression at 96h AEL and 120h AEL (Figure 1). Among genes, which steadily increased in  
476 expression throughout the three studied stages (cluster 11), we found for instance *Delta (D)*,  
477 which is one of the Notch receptor ligands (Nicholas E. Baker 2000) and has been shown to fulfill  
478 different roles during eye development (Frankfort and Mardon 2002; Kurata et al. 2000; J P Kumar  
479 and Moses 2001). Also, *anterior open (aop)* (also known as *yan*), which is described to repress  
480 photoreceptor differentiation (O'Neill et al. 1994) and also to determine R3 photoreceptor identity  
481 (Weber et al. 2008) was present in this cluster. Cluster 4 grouped genes that were highly  
482 expressed only at late L3 stage, and correspondingly showed enrichment for genes involved in  
483 pigmentation and pupariation (Table S2).

484 Although, we dissected and sequenced full eye-antennal discs and this tissue contributes to the  
485 formation of various organs, the GO enrichment analysis predominantly revealed terms related to

486 general cellular and metabolic processes and retina development. The lack of terms related to  
487 antennae or maxillary palp development may be a result of much more extensive research on eye  
488 specific developmental processes in comparison to the other organs that develop from the same  
489 imaginal disc. However, we revealed various clusters (e.g. clusters 9, 10 and 12) in which GO  
490 terms related to leg formation and proximal-distal pattern formation are highly enriched (Table S2).  
491 Since antennae and maxillary palps are serially homologue to thoracic appendages, pathways  
492 involved in leg, antenna and maxillary palp development are likely to share key regulators (Abu-  
493 Shaar and Mann 1998; Campbell and Tomlinson 1998; Dey et al. 2009; Cummins et al. 2003; P.  
494 D. S. Dong, Dicks, and Panganiban 2002; Jockusch and Smith 2015; Morata 2001; P. D. Dong,  
495 Chu, and Panganiban 2000), suggesting that genes found in these clusters may also play a role  
496 in antenna or maxillary palp development.

497 In summary, we could show that the clustering of genes based on their expression profiles  
498 throughout different stages recapitulated the processes underlying eye-antennal disc  
499 development exceptionally well. All these observations demonstrate that this comprehensive  
500 dataset can be a useful resource to identify new genes involved in the regulation of individual  
501 organ development from a common imaginal tissue.

## 502 **Identification of central transcription factors involved in eye-antennal disc development**

503 It has previously been shown that co-expression of genes is likely to be a result of regulation by  
504 similar or even the same transcription factors (Ideker et al. 2001; Tavazoie et al. 1999; Lee et al.  
505 2002; Allocco, Kohane, and Butte 2004; Altman and Raychaudhuri 2001). This basic assumption  
506 has been successfully used to identify central transcriptional regulators in developmental gene  
507 regulatory networks (MacArthur et al. 2009; Kemmeren et al. 2014; Deplancke et al. 2006; Ciofani  
508 et al. 2012; Yosef et al. 2013; Potier et al. 2014; Junion et al. 2012). The combination of our  
509 clustering of dynamic expression profiles with potential transcription factor enrichment within each  
510 cluster thus has the potential to reveal key regulators of eye-antennal disc development.

511 Central and pleiotropic transcriptional regulators are expected to regulate target genes present in  
512 different clusters. Accordingly, we found the CREB-binding protein (CBP), also known as Nejire,  
513 enriched to regulate genes in nearly all clusters (Figure 1). This zinc-finger DNA binding protein is  
514 a co-activator that can act as bridge for other transcription factors to bind specific enhancer  
515 elements (Dai et al. 1996; Kwok et al. 1994; McManus and Hendzel 2001), which can explain why  
516 we find it to regulate such many target genes. Nejire/CBP has been shown to be involved in many  
517 processes during eye development and patterning in *D. melanogaster* (Anderson, Bhandari, and  
518 Kumar 2005; Justin P Kumar et al. 2004) and mutations in this gene cause the Rubinstein-Taybi  
519 syndrome in humans (Petrif et al. 1995) that among others is characterized by extensive problems  
520 during retinal development (van Genderen et al. 2000).

521 Similarly, the GATA transcription factor Pannier is involved in the establishment of the dorsal-  
522 ventral axis of the retinal field of the discs during early L1 and L2 stages (Singh et al. 2005; Singh  
523 and Choi 2003), while later during L2 and L3 stages it is known to have a role in defining the head  
524 cuticle domain by repressing eye determination genes (Oros et al. 2010; Singh and Choi 2003).  
525 In both cases, Pannier is found in a very upstream position of the respective gene regulatory  
526 networks that define these cell fates (Maurel-Zaffran and Treisman 2000; Oros et al. 2010).  
527 However, despite this well-characterized function during head and eye development little is known  
528 about the target genes of Pannier. According to its important central role, we found Pannier  
529 enriched to regulate genes in seven out of thirteen clusters. The high number of target genes  
530 identified here are prime candidates for further functional analyses to characterize the gene  
531 regulatory network downstream of Pannier in more detail.

532 Besides the very central and general transcriptional regulators, we also identified one very specific  
533 cluster that is enriched for genes predominantly regulated by the Ecdysone receptor (EcR) (cluster  
534 5, Figure 1). The fact that this cluster contains mainly genes active at 72h AEL and 120h AEL  
535 stages, which represent major stage transitions, confirms that dynamic expression profiling and

536 subsequent clustering can yield highly process specific results. Interestingly, the interpretation of  
537 ecdysone related hormonal control has been shown to regulate various aspects of eye-antennal  
538 disc development. First, a very general role of ecdysone is to trigger stage transitions, which are  
539 characterized by ecdysone hormone pulses before larval molting and pupation (T. Li & Bender,  
540 2000). Second, ecdysone signaling has been shown to promote tissue growth in imaginal discs in  
541 general and in the eye-antennal disc specifically (Herboso et al. 2015). Third, the progression of  
542 the morphogenetic furrow during eye development is dependent on ecdysone signaling (Brennan  
543 et al. 1998). Although the Ecdysone receptor is expressed in the region of the MF, it has later  
544 been reported that the ecdysone response is transmitted by the Broad-complex (Brennan et al.  
545 2001; Brennan et al. 1998). Our data provides a set of 282 potential target genes of the Ecdysone  
546 receptor and thus represents an excellent starting point to further study the role of ecdysone  
547 signaling during eye-antennal disc development. For instance, the target genes could be used to  
548 reveal tissue specific genes to understand how a global signal, such as ecdysone can trigger a  
549 tissue specific response. Furthermore, our data may be helpful in elucidating the role of the  
550 Ecdysone receptor during eye development in *D. melanogaster*.

#### 551 **Identification of potential novel regulators of eye-antennal disc development**

552 The identification of transcription factors with already well-described central roles during eye-  
553 antennal disc development suggests that also new important transcriptional regulators can be  
554 identified. For instance, the transcription factor Caudal was found to putatively regulate many  
555 genes in the first two clusters of very early expressed genes (Figure 1, cluster 1 and 2). It has  
556 been described that Caudal is a downstream core promoter activator (Juven-Gershon, Hsu, and  
557 Kadonaga 2008) and very recently it has been found that it cooperates with Nejire to promote the  
558 expression of the homeobox gene *fushi tarazu (ftz)* (Shir-Shapira et al. 2015). Since Ftz was also  
559 found enriched to regulate genes in a cluster of early expressed genes (cluster 1), our results  
560 suggest that these three factors could also be acting together during early *D. melanogaster* eye-

561 antennal disc development. Additionally, a Caudal-like transcription factor binding motif has been  
562 identified within Sine oculis (So) bound DNA fragments as identified by ChIP-seq (Jusiak et al.  
563 2014), suggesting that So and Cad may co-regulate potential target genes in the eye-antennal  
564 disc.

565 Another unexpected result was the identification of the MADS-box transcription factor Myocyte  
566 enhancer factor 2 (DMef2) as being predicted to regulate a number of genes in various clusters.  
567 DMef2 is crucial for the development of muscle and heart tissue (Gunthorpe, Beatty, and Taylor  
568 1999). It is expressed in all mesodermal cells during blastoderm stages and its expression gets  
569 restricted by the action of the transcription factors Twist and Tinman (Lilly et al. 1994; Nguyen et  
570 al. 1994). The detection of *Dmef2* expression in loose cells attached to the developing eye-antennal  
571 discs (Figure S2) confirmed that our result is not an artefact, but rather specific. Although these  
572 cells are not considered being part of the disc proper, but rather belong to the peripodial  
573 membrane, these cells could be precursors of future head muscles. However, some recent  
574 findings could hint towards an important role of this transcription factor in eye development. It has  
575 recently been reported that DMef2 is implicated in circadian behavior, as it is necessary for the  
576 proper fasciculation-defasciculating cycle of neurons (Sivachenko et al. 2013) through one of its  
577 target genes *Fasciclin 2* (*Fas2*), which is expressed in some photoreceptor neurons (Mao and  
578 Freeman 2009). Additionally, a recent transcriptomics study of larval eye and adult ocelli found  
579 that *Dmef2* is expressed in the photoreceptors of both eye types, although the authors did not  
580 investigate this finding further (Mishra et al. 2016). These findings certainly encourage additional  
581 research on the possible role of DMef2 in photoreceptor cell development.

582 Taken together, the combination of dynamic gene expression clustering and upstream factor  
583 enrichment provides an excellent basis for the identification of potential new regulators involved  
584 in a given biological process. Intriguingly, our approach seems to be successful, although the  
585 ChIP-seq experiments that identified the direct interaction of a transcription factor with its target

586 genes were not specifically performed in eye-antennal disc tissue at the stages we studied here.  
587 Indeed, most data available in current databases is based on experiments in embryonic or adult  
588 stages (Celniker et al. 2009; Roy et al. 2010; Nègre et al. 2011; X. Li et al. 2008; Junion et al.  
589 2012). Interestingly, the enrichment of Caudal in clusters 1 and 2 (Table S3) is based on data from  
590 a ChIP-seq experiment performed in adult flies (Celniker et al. 2009), but does not represent an  
591 experiment performed in embryos (X. Li et al. 2008). This could indicate that Caudal has very  
592 different downstream targets during embryogenesis compared to its target genes at later stages.  
593 Although this observation may also indicate that the parameters and thresholds used in the  
594 different ChIP-seq experiments are very different, a large degree of tissue and stage specific target  
595 genes is expected. In the light of this specificity, we may miss eye-antennal disc specific target  
596 genes in our survey, but we are confident that one can identify a representative set of target genes  
597 to justify further tissue and stage specific ChIP-seq experiments if necessary.

#### 598 **A new role of Hb in retinal glia development and blood-brain barrier formation**

599 The comprehensive analysis of developmental high-throughput gene expression data in  
600 combination with the identification of key upstream regulators suggested that Hb may play an  
601 important role during eye-antennal disc development. Using immunostaining and reporter gene  
602 expression we confirmed that *hb* is indeed expressed in two large cells in the posterior margin of  
603 the eye-antennal discs (Figure 2 and S3). Further co-expression analyses with the pan-glia cell  
604 marker Repo and the G-protein coupled receptor Moody indicated that these cells are retinal  
605 subperineurial glia cells known as carpet cells (Silies et al. 2007; Bainton et al. 2005) (Figure 3).  
606 There are only two carpet cells in each eye-antennal disc and like other subperineurial glia cells  
607 they are polyploid and are characterized by huge cell bodies, each spanning half of the retinal field  
608 of the eye-antennal discs (Unhavaithaya and Orr-Weaver 2012; Zielke, Edgar, and DePamphilis  
609 2013). It is also known that carpet cells express Moody, a transmembrane protein that is involved  
610 in the regulation of the actin cytoskeleton in surface glia and thus influences the positioning of



611 septate junctions (Schwabe et al. 2005). Although the function and some key cellular  
612 characteristics of carpet cells are well-understood, their developmental origin and the molecular  
613 specification are largely unknown. Our preliminary functional analysis of Hb in carpet cell  
614 development and function provided first insights into these open questions.

615 Upon loss of Hb function (using either RNAi knockdown or Hb<sup>TS</sup> mutant analysis), the most obvious  
616 phenotype was the lack of polyploid cell nuclei in the eye-antennal discs (Figure 5 and S5),  
617 indicating that *hb* expression is necessary for the proper development of these cells. Additionally,  
618 we showed that the extension of *moody* positive membranes into the eye-antennal discs was  
619 impaired in loss of Hb function flies (Figure 6). The carpet cells function as a scaffold for  
620 undifferentiated retinal perineurial glia cells, which migrate into the disc to find the nascent axons  
621 of differentiating photoreceptors (Silies et al. 2007). In accordance with this scaffold function, we  
622 observed regions in the retinal field that were free of perineurial glia cells in eye-antennal discs in  
623 which polyploid carpet cell nuclei were not present. This was accompanied by the presence of  
624 unorganized axon bundles that did not project properly into the optic stalk (Figure S6). A possible  
625 explanation for the patches lacking perineurial glia cells could be the absence of the carpet cell  
626 surface to work as support layer for perineurial glia cells. Indeed, we could show that the loss of  
627 polyploid carpet cell nuclei was accompanied by impaired formation of *moody* positive cell  
628 membranes (Figure 6).

629 It has been described that in the absence of glia cells, projecting axons are not able to enter the  
630 optic stalk or get directed to it (R Rangarajan, Gong, and Gaul 1999). Interestingly, our Hb target  
631 gene analysis revealed many candidate target genes with GO terms related to axon guidance  
632 (Table S5). A link between undifferentiated retinal glia cells and axon guidance has been  
633 established as well. When perineurial glia cells contact newly forming photoreceptor axons, they  
634 differentiate into wrapping glia cells and then they enwrap the axons to participate in their  
635 projection to the brain lobes (Hummel et al. 2002). Hence, we could not only show impaired carpet



636 cell development upon loss of Hb function, but also observed an impact on glia cell migration and  
637 axon guidance as secondary effects.

638 In contrast to our results, previous studies have shown that carpet cell ablation or a reduction of  
639 their size causes over migration of perineurial glia cells anterior to the morphogenetic furrow  
640 (Yuva-Aydemir, Bauke, and Klämbt 2011; Silies et al. 2007). The corresponding experiments are  
641 based on the induction of cell death in *moody* expressing cells (Silies et al. 2007) and thus affect  
642 not only the carpet cells, but also for instance all other subperineurial glia of the brain. Since *hb*  
643 expression is very likely specific to carpet cells (see also below), the phenotype obtained here  
644 may be more specific. It remains to be studied, however, how carpet cells and subperineurial glia  
645 cells of the brain may interact to regulate perineurial glia cell migration in the eye-antennal discs.  
646 In many cases, only one carpet cell could be observed in the eye-antennal disc, and this often had  
647 a larger polyploid nucleus that was located in the midline of the eye field. In these cases, also no  
648 perineurial glia cell over migration could be observed, which might indicate that a single carpet  
649 cell could compensate the function of the other missing one.

650 Since subperineurial glia cells of the brain contribute to the blood-brain barrier (Bainton et al. 2005;  
651 Schwabe et al. 2005), we also tested if the loss of Hb function may interfere with blood-brain  
652 barrier formation. Indeed, the loss of *hb* expression affected the integrity of the blood-eye barrier,  
653 a subset of the blood-brain barrier (Figure 7). This phenotype was not as striking as previously  
654 published for *moody* mutant flies (Bainton et al. 2005), where all surface glia cells were affected,  
655 suggesting that the carpet cells may indeed only contribute to the retinal part of the blood-brain  
656 barrier (i.e. the blood-eye barrier). Intriguingly, the largest portion of the blood-brain barrier is  
657 already established by the end of embryogenesis (Beckervordersandforth et al. 2008; von Hilchen  
658 et al. 2013), while the eye-antennal disc and developing photoreceptors seem to be accessible for  
659 the hemolymph during larval and very early pupal stages. Indeed, the final closure of the blood-  
660 brain barrier in the region where the optic stalk contacts the brain (i.e. the blood-eye barrier) is

661 only established late during pupal development (Carlson, Hilgers, and Garment 1998; Carlson et  
662 al. 2000). The rather late formation of the blood-eye barrier may be related to the dual role of  
663 carpet cells, which first migrate into the eye-antennal disc and only during pupal stages migrate  
664 back into the optic stalk towards the brain lobes. By mid-pupa stages they are located at the base  
665 of the brain lamina (T. N. Edwards et al. 2012), where they remain throughout adult life and form  
666 septate junctions that isolate the brain and retina from the hemolymph (Carlson et al. 2000).

667 Due to its pivotal role in maintaining the correct physiological conditions in the central nervous  
668 system, the blood-brain barrier is of foremost importance for all metazoan organisms. Also in  
669 vertebrates, glia cells and especially astrocyte glia, with similar cellular features as subperineurial  
670 glia in insects, are the main components of this barrier (Iadecola and Nedergaard 2007). Thus,  
671 the study of the function of subperineurial glia cells in blood-brain barrier formation in the  
672 invertebrate model *D. melanogaster* can be of great interest to gain insights into central nervous  
673 system physiology and disease studies (DeSalvo et al. 2014). Additionally, while the role of Hb in  
674 anterior-posterior patterning seems to be conserved only in insects or arthropods (Pinnell 2006;  
675 Schröder 2003), its role in central nervous system development is conserved at least across all  
676 protostomes (Pinnell 2006). One of the *hb* homologs known in mammals, *ikaros*, which also  
677 promotes early-born neuronal fate in mouse (Alsio et al. 2013), has been shown to have a role in  
678 conferring identity to retinal progenitor cells (Elliott et al. 2008). It is therefore tempting to  
679 investigate a potential role of Ikaros in vertebrate blood-brain barrier development.

### 680 **The molecular role of Hb during carpet cell development**

681 The lack of ployploid large carpet cells during larval stages and the loss of blood-brain barrier  
682 integrity could either indicate a central role of Hb in specifying carpet cell identity entirely or a more  
683 specific role in defining aspects of carpet cell identity such as polyploidy and/or its migratory  
684 behavior. The exact role of Hb, however, is still unclear and will require further in-depth analyses.  
685 Based on our data presented here, we propose the following cellular functions:

686 First, the lack of polyploid nuclei could hint towards a role of Hb in regulating the extensive  
687 endoreplication process necessary to generate such huge cell nuclei. Indeed, in our target gene  
688 analysis we found (*archipelago*) *ago* as one potential target. Ago has been shown to induce  
689 degradation of CyclinE (CycE) (Moberg et al. 2001), a crucial prerequisite for efficient  
690 endoreplication cycles (Shcherbata 2004). A role of Hb in the regulation of endoreplication is  
691 further supported by a preliminary overexpression experiment. We expressed *hb* ectopically in  
692 perineurial glia cells using the specific driver *c527-Gal4* (Ito, Urban, and Technau 1995) and we  
693 observed an increased number of glia cells with large nuclei in the optic stalk (data not shown).  
694 Since retinal perineurial glia cells still proliferate and are undifferentiated (Radha Rangarajan,  
695 Courvoisier, and Gaul 2001; R Rangarajan, Gong, and Gaul 1999), the ectopic expression of *hb*  
696 may have induced endoreplication cycles, reminiscent of carpet cells.

697 Second, Hb could be involved in establishing the migratory behavior of carpet cells. In the list of  
698 putative Hb target genes, we found many genes with GO terms related to cell migration and, some  
699 even specifically with the “glia cell migration” term. Additionally, many of the identified Hb target  
700 genes are involved in the epidermal growth factor (EGF) pathway. This is a well-conserved  
701 pathway that has received a lot of interest due to its various roles in development and cancer (Gao  
702 et al. 2011; Yewale et al. 2013; S. V Sharma et al. 2007). The activation of the EGF receptor  
703 (EGFR) by the binding of specific ligands initiates a signaling cascade that transmits information  
704 between cells during many different processes, including cell division, differentiation, cell survival  
705 and migration (B.-Z. Shilo 2005; B. Shilo 2003). Most of these roles of the EGF pathway have also  
706 been shown to be involved in *D. melanogaster* eye development (Malartre 2016). The list of Hb  
707 target genes up-regulated at 96h and 120h AEL in eye-antennal disc development includes both  
708 positive (*rhomboid*, *Star* and *CBP*) and negative regulators (*Fasciclin2* and *sprouty*) of this  
709 pathway. *Fas2* and *sprouty* are specifically expressed in carpet cells (Figure 9C and 9D),  
710 suggesting that Hb may actively influence the migratory behavior of carpet cells by activating  
711 genes involved in EGFR signaling regulation. Another putative target gene of Hb is *Ets98b*.

712 Intriguingly, it has recently been shown during early embryonic development in the common house  
713 spider *Parasteatoda tepidariorum* that the ortholog Ets4/Ets98b induces ectopic cell migration  
714 upon misexpression (Pechmann et al., submitted). We also performed preliminary misexpression  
715 experiments and expressed *hb* ectopically in wrapping glia cells (not shown). In such  
716 misexpression eye-antennal discs we observed cell nuclei between the axon bundles in the optic  
717 stalk. These may be wrapping glia cells that over migrate into the stalk, although they normally  
718 remain in the eye-antennal disc and only their extended cell membranes project to the brain lamina  
719 or medulla to accompany the photoreceptor axons (Hummel et al. 2002).

720 In summary, our functional analyses in combination with computationally supported target gene  
721 prediction suggests that Hb plays a central role in specifying key cellular features of carpet cells:  
722 polyploidy and extensive migratory abilities.

### 723 **Implication on the origin and nature of carpet cells**

724 Although carpet cells fulfill fundamental functions, it is still unclear where these cells originate from.  
725 Based on observations by Choi and Benzer (1994) using the enhancer trap line M1-126, these  
726 cells originate in the optic stalk where they are present at late L2 stage (Choi and Benzer 1994).  
727 It has also been proposed that carpet cells may originate from a pool of neuroblasts in the  
728 neuroectoderm during embryogenesis (Homem and Knoblich 2012) or in the optic lobes (Apitz  
729 and Salecker 2014). A clonal analysis using the FLP-out system suggests that various retinal glia  
730 cell types, including the carpet cells, originate from at least one mother cell at L1 larval stage (R  
731 Rangarajan, Gong, and Gaul 1999). Since only one polyploid cell nucleus seems to originate from  
732 one clone (R Rangarajan, Gong, and Gaul 1999) and we show that in some loss of Hb imaginal  
733 discs only one polyploid cell nucleus is present, we propose that the two carpet cells may originate  
734 independently probably from two mother cells defined during L1 stages. Hb may be the key  
735 transcription factor specifying carpet cell fate to distinguish them from other retinal glia cells. Our  
736 observation that loss of Hb function resulted in loss of polyploid carpet cell nuclei when Hb<sup>TS</sup>

737 mutant flies were transferred to the restrictive temperature during the L1 larval stage, further  
738 supports an involvement of Hb during this stage (Figure 5 and S5)

739 Carpet cells have been shown to be a sub-population of the subperineurial glia cells due to shared  
740 key cellular features, such as the formation of extensive septate junctions (Silies et al. 2007).  
741 However, a well-established subperineurial glia cell driver (NP2276 (Awasaki et al. 2008)) does  
742 drive reporter gene expression in brain subperineurial glia, but not in carpet cells (data not shown).  
743 In contrast, we only detected *hb* expression in carpet cells and not in any subperineurial glia cells  
744 in the larval brain (results confirmed both using immunostaining and two driver lines (VT038544  
745 and VT038545), not shown). Additionally, if we compare our list of putative Hb target genes with  
746 the 50 genes enriched in adult blood-brain barrier surface glia (DeSalvo et al. 2014), we only find  
747 *Fas2* to be present in both datasets. All these data suggest that carpet cells are indeed a retina  
748 specific subperineurial glia cell type that is molecularly very distinct from brain subperineurial glia  
749 cells.

750 The use of the newly analyzed driver lines VT038544 and VT038545, which drive expression  
751 specifically in the carpet cells in combination with the extensive list of potential Hb target genes,  
752 of which many are likely to be expressed in this specific glia cell type, represents a valuable  
753 resource to address the questions concerning the origin of these cells in more detail.

## 754 **Conclusions**

755 In this study, we identified a new role of Hb in retinal glia cell development. This finding has only  
756 been possible because we studied the dynamic expression profiles of all genes expressed during  
757 eye-antennal disc development. Since the RNA levels of *hb* in the entire eye-antennal disc are  
758 negligible, we could identify Hb as central factor only through the expression profiles of its putative  
759 target genes, which are steadily up regulated throughout development. This up regulation is very  
760 likely due to the large cell bodies of the carpet cells, which need to produce high amounts cytosolic

761 or membrane bound proteins. At earlier stages, carpet cells are not yet in the eye-antennal discs,  
762 and *hb* expression could have only been identified by studies focused on the optic stalk. Moreover,  
763 we could show that refining the putative Hb target genes by incorporating the expression data  
764 results in a list that contains genes with GO terms highly specific for the putative function of Hb in  
765 carpet cells. Based this stepwise identification of target genes, we could select and confirm a high  
766 number of those experimentally.

767 All these findings demonstrate that the combination of high throughput transcript sequencing with  
768 a ChIP-seq data based transcription factor enrichment analysis can reveal previously unknown  
769 factors and also their target genes, and therefore increase the number of connections within the  
770 underlying developmental GRNs. Other studies have searched for regulating transcription factors  
771 that were in the same co-expression clusters as its targets genes (Potier et al. 2014). However,  
772 upstream orchestrators do not necessarily have the same expression levels as their targets.  
773 Therefore, the combination of ChIP-seq methods in RNA-seq co-expression analyses has proven  
774 to be a powerful tool to identify new developmental regulators that can complement other studies  
775 based on reverse genetics.

776

## 777 **Materials and methods**

### 778 **RNA extraction and sequencing**

779 *D. melanogaster* (OregonR) flies were raised at 25°C and 12h:12h dark:light cycle for at least two  
780 generations and their eggs were collected in 1h windows. Freshly hatched L1 larvae were  
781 transferred into fresh vials in density-controlled conditions (30 freshly hatched L1 larvae per vial).  
782 At the required time point, eye-antennal discs of either only female larvae (96h and 120h AEL) or  
783 male and female larvae (72h AEL) were dissected and stored in RNALater (Qiagen, Venlo,  
784 Netherlands). 40-50 discs were dissected for the 120h samples, 80-90 discs for the 96h samples  
785 and 120-130 discs for the 72h samples. Three biological replicates were generated for each  
786 sample type.

787 Total RNA was isolated using the Trizol (Invitrogen, Thermo Fisher Scientific, Waltham,  
788 Massachusetts, USA) method according to the manufacturer's recommendations and the samples  
789 were DNaseI (Sigma, St. Louis, Missouri, USA) treated in order to remove DNA contamination.  
790 RNA quality was determined using the Agilent 2100 Bioanalyzer (Agilent Technologies, Santa  
791 Clara, CA, USA) microfluidic electrophoresis. Only samples with comparable RNA integrity  
792 numbers were selected for sequencing.

793 Library preparation for RNA-seq was performed using the TruSeq RNA Sample Preparation Kit  
794 (Illumina, catalog ID RS-122-2002) starting from 500 ng of total RNA. Accurate quantitation of  
795 cDNA libraries was performed using the QuantiFluor™dsDNA System (Promega, Madison,  
796 Wisconsin, USA). The size range of final cDNA libraries was determined applying the DNA 1000  
797 chip on the Bioanalyzer 2100 from Agilent (280 bp). cDNA libraries were amplified and sequenced  
798 (50 bp single-end reads) using cBot and HiSeq 2000 (Illumina). Sequence images were  
799 transformed to bcl files using the software BaseCaller (Illumina). The bcl files were demultiplexed  
800 to fastq files with CASAVA (version 1.8.2).

## 801 **BIOINFORMATICS ANALYSES**

### 802 **Quality control**

803 Quality control was carried out using FastQC software (version 0.10.1, Babraham Bioinformatics).  
804 All samples but one (“72hC” sample) had quality score >Q28 for all read positions. 12% of reads  
805 in sample “72hC” had an “N” in position 45, probably due to an air bubble in the sequencer.  
806 Following recently published guidelines (MacManes 2014; Williams et al. 2016), sequences were  
807 not trimmed but the aligner software was used to this purpose instead with very stringent  
808 parameters (see below). All raw fastq files are available through GEO Series accession number  
809 GSE94915.

### 810 **Read mapping**

811 Transcript sequences (only CDS) of *D. melanogaster* (r5.55) were downloaded from FlyBase and  
812 only the longest transcript per gene was used as reference to map the reads using Bowtie2  
813 (Langmead and Salzberg 2012) with parameters `-very-sensitive-local -N 1`. The number  
814 of reads mapping to each transcript were summarized using the command `idxstats` from  
815 SAMtools v0.1.19 (H. Li et al. 2009). A summary of raw read counts mapped to each gene and  
816 time point is available at the GEO repository (GSE94915).

### 817 **Gene expression clustering**

818 HTSFilter (Rau et al. 2013) was used with default parameters to discard lowly expressed genes  
819 across all samples. The function `PoisMixClusWrapper` from the library HTScluster (Rau et al.  
820 2015) was applied on the rest of genes with the parameters: `gmin=1, gmax=25,`  
821 `lib.type="DESeq"`.

822 Different model selection approaches are used by HTScluster (i.e. to identify the number of  
823 clusters that best describe the data (see (Rau et al. 2015))). Our previous experience with this



824 package had shown that the BIC and ICL methods report always as many clusters as we have  
825 allowed to test for (corresponding to the “gmax” parameter). Also for this analysis, both methods  
826 reported 25 as the most likely number of clusters, which was the input “gmax” value.  
827 Consequently, we discarded these results and we only analyzed the results of the methods that  
828 use slope heuristics to calculate the best number of clusters, namely DDSE and Djump. The DDSE  
829 method reported 19 clusters, with 8,626 genes having MAP > 99% while the Djump method  
830 reported 13 clusters, with 8,836 genes having MAP > 99%. Careful inspection of the lambda  
831 values of each of these clusters showed that the additional clusters predicted by the DDSE method  
832 presented negligible variation to the 13 clusters predicted by Djump. Additionally, GO term  
833 analysis (see below) of the genes in the 19 clusters predicted by DDSE showed redundant terms  
834 for the very similar additional clusters, which was not the case with the 13 clusters predicted by  
835 Djump. Therefore, we concluded that the additional clusters present in the DDSE prediction were  
836 unlikely to represent significant biological differences and that the 13 clusters predicted by Djump  
837 could sufficiently describe the profiles of the groups of co-expressed genes and we used them for  
838 all following analyses.

839 Genes with predicted MAP < 99% were discarded. Cluster assignment results can be found at the  
840 GEO repository (GSE94915). For the plots, the variance stabilizing transformation from DESeq2  
841 (Love, Anders, and Huber 2014) library was used to normalize the background read count of the  
842 genes belonging to each cluster.

843 The Gene Ontology terms enriched in each cluster of genes were obtained with the plugin BiNGO  
844 (Maere, Heymans, and Kuiper 2005) in Cytoscape v3.1.1 (Cline et al. 2007) with default  
845 parameters. The ontology terms and corresponding *D. melanogaster* annotations were  
846 downloaded from geneontology.org (Ashburner et al. 2000; Consortium 2015) (as of January  
847 2015).

848 The transcription factors enriched to regulate the genes of each cluster were obtained with the i-  
849 cisTarget method (Herrmann et al. 2012) with the following parameters: dm3 assembly, only “TF  
850 binding sites”, 5 Kb upstream and full transcript as mapping region, 0.4 as minimum fraction of  
851 overlap, 3.0 as NES threshold and 0.01 ROC threshold.

## 852 **Identification of Hb target genes**

853 The i-cisTarget method (Herrmann et al. 2012) to detect transcription factor enrichment in the  
854 regulatory regions of co-regulated genes is based on the arbitrary partition of the *D. melanogaster*  
855 genome in more than 13,000 regions. All genes included in a particular region are associated to  
856 the transcription factor binding interval, resulting maybe in an unspecific association between  
857 transcription factor and target genes. Therefore, we aimed to generate a more confident list of  
858 putative Hb target genes in the eye-antennal disc. From Berkeley *Drosophila* Transcription  
859 Network Project (BDTNP) site (X. Li et al. 2008), BED files were downloaded for the Hb (anti-Hb  
860 (antibody 2), stage 9) ChIP-chip experiment (Symmetric-null test and 1% FDR cutoff). The LiftOver  
861 tool from UCSC Browser (Kent et al. 2002) was used to transform the dm2 coordinates into the  
862 dm3 assembly. The closest gene to each ChIP-chip interval was identified with the script  
863 `annotatePeaks.pl` from the HOMER suite of tools (Heinz et al. 2010). Enrichment for the Hb  
864 motif in the regulatory regions of the identified genes were confirmed with the script  
865 `findMotifGenome.pl` from the same suite. The identified enriched Hb motif (as matrix) was  
866 used to search again the closest genes to the ChIP-chip intervals using the script  
867 `annotatePeaks.pl` with the parameters `tss -size -1000,1000 -m motif_matrix`. The genes with  
868 at least one instance of the motif were selected as Hb high confident targets. Cytoscape v3.1.1  
869 (Cline et al. 2007) was used to visualize high confidence Hb targets which are significantly up-  
870 and down-regulated in the 72h AEL to 96h AEL and 96h AEL to 120h AEL transitions.

871

## 872 **EXPERIMENTAL PROCEDURES**

### 873 **Fly lines and crosses**

874 The following fly lines were used: UAS-*hb*<sub>dsRNA</sub> (Bloomington Stock Center #54478, #29630 and  
875 #34704 and Vienna Drosophila Research Center #107740), *hb*-Gal4 (Vienna Tile library (Pfeiffer  
876 et al. 2008) VT038544 and VT038545), UAS-*hb* (Bloomington Stock Center #8503), *repo*-  
877 Gal4/TM6B (kindly provided by Marion Sillies), *moody*-Gal4 ((Schwabe et al. 2005) kindly provided  
878 by Christian Klämbt), *DMef2*-Gal4 (Bloomington Stock Center #25756) UAS-stinger-GFP (nGFP)  
879 ((Barolo, Carver, and Posakony 2000) kindly provided by Gerd Vorbrüggen), UAS-H2B:RFP  
880 (kindly provided by Andreas Wodarz) and 20xUAS-mCD8::GFP (Bloomington Stock Center  
881 #32194). Lines expressing Gal4 under control of regulatory regions of the Hb putative target genes  
882 were obtained from Bloomington Stock Center (*ago*-Gal4 (#103-788), *brk*-Gal4 (#53707), *CadN*-  
883 Gal4 (#49660), *Dl*-Gal4 (#45495), *Fas2*-Gal4 (#48449), *kni*-Gal4 (#50246), *rho*-Gal4 (#49379),  
884 *robo3*-Gal4 (#41256), *Sox21b*-Gal4 (#39803), *Src64B*-Gal4 (#49780), *sty*-Gal4 (#104304) and  
885 *tkv*-Gal4 (#112552)).

886 All crosses were performed with an approximate ratio of 4:3 female:male flies. Crosses were  
887 always provided with additional yeast and were kept at 12h:12h dark:light cycle and controlled  
888 humidity, except the RNAi experiments, that were kept at 28°C and constant darkness.

### 889 ***hb* RNA interference**

890 We obtained 4 different UAS-*hb*<sub>dsRNA</sub> lines from Bloomington Stock Center (#54478, #29630 and  
891 #34704) and from the Vienna Drosophila Research Center (#107740). We took advantage of the  
892 fact that Hb is known to be necessary during early embryogenesis (Lehmann and Nüsslein-  
893 Volhard, 1987; Nüsslein-Volhard and Wieschaus, 1980) to evaluate the knock-down efficiency.  
894 UAS-*hb*<sub>dsRNA</sub> flies were crossed to the *hb*-Gal4 lines (VT038544 and VT038545) to see if the  
895 survival of the offspring was affected. Only one of the RNAi lines, namely #34704, produced no

896 adult flies and few dead pupae when crossed with the *hb*-Gal4 flies. The other three lines produced  
897 a normal number of offspring with no obvious phenotype. Consequently, we used the #34704 line  
898 for the knock-down experiments. Please note that the evaluation of knock-down efficiency in the  
899 developing eye-antennal discs using quantitative PCR is very limited because the expression of  
900 *hb* itself is very low (practically no reads are detected by RNA-seq, not shown).

#### 901 **Hb<sup>TS</sup> cross**

902 *Hb<sup>TS1</sup>, rsd<sup>1</sup>/TM3, Sb<sup>1</sup>* flies (Bloomington Stock Center #1753) were crossed to *hb<sup>12</sup>, st<sup>1</sup>, e<sup>1</sup>/TM3,*  
903 *Sb<sup>1</sup>* flies (Bloomington Stock Center #1755) to generate a *hb<sup>TS1</sup>/hb<sup>12</sup>* stock. This line was kept at  
904 18°C and constant light and larvae were only transferred to the restrictive temperature (28°C) for  
905 the loss of function experiments.

#### 906 ***in-situ* hybridization**

907 Standard procedures were followed to clone a fragment (872 bp) of *hunchback* gene sequence  
908 into pCRII vector and to synthesize an antisense digoxigenin-labeled RNA probe (and sense probe  
909 for the negative control). RNA probes were hydrolyzed with Na-Carboante buffer for 30.5 minutes.  
910 Eye-antennal discs were dissected in cold PBS and fixed with 4% paraformaldehyde.  
911 Hybridization was carried out at 63°C overnight with 5 µl of RNA probe (291 ng/µl) in 50 µl of  
912 hybridization buffer. Anti-Dig antibody (1:2000, Sigma-Aldrich) was used to detect the probe and  
913 revealed with NBT/BCIP reaction mix. Pictures were taken with a Zeiss Axioplan microscope.

#### 914 **Immunohistochemistry**

915 Antibody stainings were performed using standard procedures (Klein 2008). In all cases, dissected  
916 eye-antennal discs were fixed with 4% paraformaldehyde before incubating with primary and  
917 secondary antibodies. Antibodies used were: rabbit α-Repo ((von Hilchen et al. 2013), 1:1000),  
918 guinea-pig α-Hb ((Kosman, Small, and Reinitz 1998), 1:50), mouse α-cut (Invitrogen, 1:100), rabbit

919  $\alpha$ -Hb (kind gift from Chris Q. Doe, 1:100), Cy3- $\alpha$ -HRP (kind gift from Martin Göpfert, 1:300), goat  
920  $\alpha$ -rabbit Alexa Fluor 488 (Invitrogen, 1:1000), goat  $\alpha$ -rabbit Alexa Fluor 555 (Invitrogen, 1:100)  
921 and goat  $\alpha$ -guinea-pig Alexa Fluor 555 (Invitrogen, 1:1000). A solution of 80% glycerol + 4% n-  
922 propyl gallate in PBS was used as mounting medium for all stained discs. Pictures were taken on  
923 a Zeiss LSM-510 confocal laser scanning microscope.

#### 924 **Blood-eye barrier assay**

925 The integrity of the blood-eye barrier of *hunchback* knock-down flies was studied following the  
926 protocol from (Pinsonneault et al. 2011). *moody*-Gal4 virgin females were crossed with UAS-  
927 *hb*<sub>dsRNA</sub> males at 28°C. UAS-*hb*<sub>dsRNA</sub> flies were used as control and also raised at 28°C. 2-3 day  
928 old adults from these crosses were injected in the abdomen with 3-5 kDa FITC dextran (Sigma-  
929 Aldrich) (0.3  $\mu$ l the females and 0.2  $\mu$ l the males of 25 mg/ml solution). Animals were allowed to  
930 recover in fresh food over-night. Only surviving animals were scored. Dye penetrance in each eye  
931 was assessed qualitatively using a LEICA M205 FA fluorescent stereo microscope.

932

## 933 **Acknowledgements**

934 We would like to thank Alistair McGregor, Isabel Almudi, Marion Silies, Iris Salecker, Gerd  
935 Vorbrüggen, Fernando Casares, Ernst Wimmer and Halyna Shcherbata for providing reagents  
936 and for valuable discussions and critical comments throughout the project. We thank Marita  
937 Büscher for various discussions about *Drosophila* nervous system development. We would also  
938 like to thank the Transcriptome Analysis Lab (TAL) (University Medical Center Göttingen, UMG)  
939 in Göttingen for the Illumina sequencing. Stocks obtained from the Bloomington *Drosophila* Stock  
940 Center (NIH P40OD018537) were used in this study.

941 This work was funded by a grant of the Volkswagen Foundation (project number: 85 983) and by  
942 the Emmy Noether Programme of the Deutsche Forschungsgemeinschaft (grant number: PO  
943 1648/3-1) to NP, and a “la Caixa-DAAD” fellowship to MT-O. The work of MT-O was additionally  
944 kindly supported by the Göttingen Graduate School for Neurosciences, Biophysics, and Molecular  
945 Biosciences (GGNB).

946

## 947 **Authors contribution**

948 NP and MT-O conceived the experiments. MT-O extracted the RNA for Illumina sequencing and  
949 performed all bioinformatics analyses. MT-O, JS, GW and FK performed the functional Hunchback  
950 experiments. MT-O and NP interpreted the data and wrote the manuscript. All authors read and  
951 approved the manuscript.

## 952 **Competing interests**

953 No competing interests declared.

## 954 **References**

- 955 Abu-Shaar, M, and R S Mann. 1998. "Generation of Multiple Antagonistic Domains along the  
956 Proximodistal Axis during Drosophila Leg Development." *Development (Cambridge,*  
957 *England)* 125 (19): 3821–30.
- 958 Aerts, Stein, Xiao Jiang Quan, Annelies Claeys, Marina Naval Sanchez, Phillip Tate, Jiekun Yan,  
959 and Bassem a. Hassan. 2010. "Robust Target Gene Discovery through Transcriptome  
960 Perturbations and Genome-Wide Enhancer Predictions in Drosophila Uncovers a Regulatory  
961 Basis for Sensory Specification." *PLoS Biology* 8 (7).  
962 doi:10.1371/journal.pbio.1000435.g001.
- 963 Aguilar-Hidalgo, Daniel, María a Domínguez-Cejudo, Gabriele Amore, Anette Brockmann, María  
964 C Lemos, Antonio Córdoba, and Fernando Casares. 2013. "A Hh-Driven Gene Network  
965 Controls Specification, Pattern and Size of the Drosophila Simple Eyes." *Development*  
966 *(Cambridge, England)* 140 (1): 82–92. doi:10.1242/dev.082172.
- 967 Allocco, Dominic J, Isaac S Kohane, and Atul J Butte. 2004. "Quantifying the Relationship between  
968 Co-Expression, Co-Regulation and Gene Function." *BMC Bioinformatics* 5 (1): 18.  
969 doi:10.1186/1471-2105-5-18.
- 970 Alsio, J. M., Basile Tarchini, Michel Cayouette, and Frederick J Livesey. 2013. "Ikaros Promotes  
971 Early-Born Neuronal Fates in the Cerebral Cortex." *Proceedings of the National Academy of*  
972 *Sciences* 110 (8): E716–25. doi:10.1073/pnas.1215707110.
- 973 Altman, R. B., and S. Raychaudhuri. 2001. "Whole-Genome Expression Analysis: Challenges  
974 beyond Clustering." *Current Opinion in Structural Biology* 11 (3): 340–47. doi:10.1016/S0959-  
975 440X(00)00212-8.

- 976 Anais Tiberghien, Marie, Gaelle Lebreton, David Cribbs, Corinne Benassayag, and Magali  
977 Suzanne. 2015. "The Hox Gene Dfd Controls Organogenesis by Shaping Territorial Border  
978 through Regulation of Basal DE-Cadherin Distribution." *Developmental Biology* 405 (2).  
979 Elsevier: 183–88. doi:10.1016/j.ydbio.2015.07.020.
- 980 Anderson, Jason, Rohan Bhandari, and Justin P. Kumar. 2005. "A Genetic Screen Identifies  
981 Putative Targets and Binding Partners of CREB-Binding Protein in the Developing Drosophila  
982 Eye." *Genetics* 171 (4): 1655–72. doi:10.1534/genetics.105.045450.
- 983 Anderson, Jason, Claire L. Salzer, and Justin P. Kumar. 2006. "Regulation of the Retinal  
984 Determination Gene Dachshund in the Embryonic Head and Developing Eye of Drosophila."  
985 *Developmental Biology* 297 (2): 536–49. doi:10.1016/j.ydbio.2006.05.004.
- 986 Apitz, Holger, and Iris Salecker. 2014. "A Challenge of Numbers and Diversity: Neurogenesis in  
987 the Drosophila Optic Lobe." *Journal of Neurogenetics* 28 (3–4): 233–49.  
988 doi:10.3109/01677063.2014.922558.
- 989 Ashburner, Michael, Catherine A. Ball, Judith A. Blake, David Botstein, Heather Butler, J. Michael  
990 Cherry, Allan P. Davis, et al. 2000. "Gene Ontology: Tool for the Unification of Biology."  
991 *Nature Genetics* 25 (1). Nature Publishing Group: 25–29. doi:10.1038/75556.
- 992 Atkins, Mardelle, and Graeme Mardon. 2009. "Signaling in the Third Dimension: The Peripodial  
993 Epithelium in Eye Disc Development." *Developmental Dynamics* 238 (9): 2139–48.  
994 doi:10.1002/dvdy.22034.
- 995 Awasaki, Takeshi, Sen-Lin Lai, Kei Ito, and Tzumin Lee. 2008. "Organization and Postembryonic  
996 Development of Glial Cells in the Adult Central Brain of Drosophila." *The Journal of  
997 Neuroscience: The Official Journal of the Society for Neuroscience* 28 (51): 13742–53.  
998 doi:10.1523/JNEUROSCI.4844-08.2008.



- 999 Bainton, Roland J., L. T Y Tsai, Tina Schwabe, Michael DeSalvo, Ulrike Gaul, and Ulrike  
1000 Heberlein. 2005. "Moody Encodes Two GPCRs That Regulate Cocaine Behaviors and Blood-  
1001 Brain Barrier Permeability in *Drosophila*." *Cell* 123 (1): 145–56.  
1002 doi:10.1016/j.cell.2005.07.029.
- 1003 Baker, N E, and S Y Yu. 2001. "The EGF Receptor Defines Domains of Cell Cycle Progression  
1004 and Survival to Regulate Cell Number in the Developing *Drosophila* Eye." *Cell* 104 (5): 699–  
1005 708. doi:10.1016/S0092-8674(02)06076-2.
- 1006 Baker, Nicholas E. 2000. "Notch Signaling in the Nervous System. Pieces Still Missing from the  
1007 Puzzle." *BioEssays* 22 (3): 264–73. doi:10.1002/(SICI)1521-1878(200003)22:3<264::AID-  
1008 BIES8>3.0.CO;2-M.
- 1009 Baonza, Antonio, and Matthew Freeman. 2002. "Control of *Drosophila* Eye Specification by  
1010 Wingless Signalling." *Development (Cambridge, England)* 129 (23): 5313–22.  
1011 doi:10.1242/dev.00096.
- 1012 Barolo, S, L A Carver, and J W Posakony. 2000. "GFP and Beta-Galactosidase Transformation  
1013 Vectors for Promoter/enhancer Analysis in *Drosophila*." *BioTechniques* 29 (4): 726, 728, 730,  
1014 732.
- 1015 Baudry, Jean-Patrick, Cathy Maugis, Bertrand Michel, J.-P Baudry, and B Michel. 2012. "Slope  
1016 Heuristics: Overview and Implementation." *Stat Comput* 22: 455–70. doi:10.1007/s11222-  
1017 011-9236-1.
- 1018 Bauke, a.-C., S. Sasse, T. Matzat, and C. Klambt. 2015. "A Transcriptional Network Controlling  
1019 Glial Development in the *Drosophila* Visual System." *Development* 4 (May). highwire: 1–10.  
1020 doi:10.1242/dev.119750.
- 1021 Beckervordersandforth, Ruth M., Christof Rickert, Benjamin Altenhein, and Gerhard M. Technau.

- 1022 2008. "Subtypes of Glial Cells in the Drosophila Embryonic Ventral Nerve Cord as Related  
1023 to Lineage and Gene Expression." *Mechanisms of Development* 125 (5–6): 542–57.  
1024 doi:10.1016/j.mod.2007.12.004.
- 1025 Bender, M., F.R. Turner, and T.C. Kaufman. 1987. "A Developmental Genetic Analysis of the  
1026 Gene Regulator of Postbithorax in Drosophila Melanogaster." *Developmental Biology* 119  
1027 (2): 418–32. doi:10.1016/0012-1606(87)90046-7.
- 1028 Bogdan, Sven, and Christian Klämbt. 2001. "Epidermal Growth Factor Receptor Signaling."  
1029 *Current Biology* 11 (8): R292–95. doi:10.1016/S0960-9822(01)00167-1.
- 1030 Brennan, C A, M. Ashburner, K. Moses, C. Antoniewski, B. Mugat, F. Delbac, J.-A. Lepesant, et  
1031 al. 1998. "Ecdysone Pathway Is Required for Furrow Progression in the Developing  
1032 Drosophila Eye." *Development (Cambridge, England)* 125 (14): 2653–64.  
1033 doi:10.1016/s0012-1606(74)80016-3.
- 1034 Brennan, C A, T R Li, M Bender, F Hsiung, K Moses, J. Alcedo, M. Ayzenzon, et al. 2001. "Broad-  
1035 Complex, but Not Ecdysone Receptor, Is Required for Progression of the Morphogenetic  
1036 Furrow in the Drosophila Eye." *Development (Cambridge, England)* 128 (1): 1–11.  
1037 doi:10.1016/s0092-8674(00)80094-x.
- 1038 Brown, N L, S W Paddock, C a Sattler, C Cronmiller, B J Thomas, and S B Carroll. 1996.  
1039 "Daughterless Is Required for Drosophila Photoreceptor Cell Determination, Eye  
1040 Morphogenesis, and Cell Cycle Progression." *Developmental Biology* 179 (1): 65–78.  
1041 doi:10.1006/dbio.1996.0241.
- 1042 Campbell, G, and A Tomlinson. 1998. "The Roles of the Homeobox Genes *Aristaless* and *Distal-*  
1043 *Less* in Patterning the Legs and Wings of Drosophila." *Development (Cambridge, England)*  
1044 125 (22): 4483–93.

- 1045 Carlson, Stanley D., Susan L. Hilgers, and Martin B. Garment. 1998. "Blood-Eye Barrier of the  
1046 Developing *Drosophila Melanogaster* (Diptera : Drosophilidae)." *International Journal of*  
1047 *Insect Morphology and Embryology* 27 (3): 241–47. doi:10.1016/S0020-7322(98)00016-6.
- 1048 Carlson, Stanley D, Jyh-lyh Juang, Susan L Hilgers, and Martin B Garment. 2000. "Blood Barriers  
1049 of the Insect." *Annual Review of Entomology* 45 (1): 151–74.  
1050 doi:10.1146/annurev.ento.45.1.151.
- 1051 Casares, F, and R S Mann. 1998. "Control of Antennal versus Leg Development in *Drosophila*."  
1052 *Nature* 392 (6677): 723–26. doi:10.1038/33706.
- 1053 Casares, Fernando, and Isabel Almudi. 2016. "Fast and Furious 800. The Retinal Determination  
1054 Gene Network in *Drosophila*." In *Organogenetic Gene Networks*, edited by James Castelli-  
1055 Gair Hombría and Paola Bovolenta, 95–124. Cham: Springer International Publishing.  
1056 doi:10.1007/978-3-319-42767-6.
- 1057 Cavodeassi, F, R Diez Del Corral, S Campuzano, and M Domínguez. 1999. "Compartments and  
1058 Organising Boundaries in the *Drosophila* Eye: The Role of the Homeodomain Iroquois  
1059 Proteins." *Development (Cambridge, England)* 126 (22): 4933–42.
- 1060 Celniker, Susan E, Laura A L Dillon, Mark B Gerstein, Kristin C Gunsalus, Steven Henikoff, Gary  
1061 H Karpen, Manolis Kellis, et al. 2009. "Unlocking the Secrets of the Genome." *Nature* 459  
1062 (7249): 927–30. doi:10.1038/459927a.
- 1063 Chen, R, G Halder, Z Zhang, and G Mardon. 1999. "Signaling by the TGF-Beta Homolog  
1064 Decapentaplegic Functions Reiteratively within the Network of Genes Controlling Retinal Cell  
1065 Fate Determination in *Drosophila*." *Development (Cambridge, England)* 126 (5): 935–43.
- 1066 Cheyette, Benjamin N R, Patricia J. Green, Kathy Martin, Hideki Garren, Volker Hartenstein, and  
1067 S. Lawrence Zipursky. 1994. "The *Drosophila* *Sine Oculis* Locus Encodes a Homeodomain-

- 1068           Containing Protein Required for the Development of the Entire Visual System.” *Neuron* 12  
1069           (5): 977–96. doi:10.1016/0896-6273(94)90308-5.
- 1070   Cho, K O, J Chern, S Izaddoost, and K W Choi. 2000. “Novel Signaling from the Peripodial  
1071           Membrane Is Essential for Eye Disc Patterning in *Drosophila*.” *Cell* 103 (2): 331–42.  
1072           doi:10.1016/S0092-8674(00)00124-0.
- 1073   Choi, K. W., and S. Benzer. 1994. “Migration of Glia along Photoreceptor Axons in the Developing  
1074           *Drosophila* Eye.” *Neuron* 12 (2): 423–31. doi:10.1016/0896-6273(94)90282-8.
- 1075   Ciofani, Maria, Aviv Madar, Carolina Galan, MacLean Sellars, Kieran Mace, Florencia Pauli,  
1076           Ashish Agarwal, et al. 2012. “A Validated Regulatory Network for Th17 Cell Specification.”  
1077           *Cell* 151 (2). Elsevier Inc.: 289–303. doi:10.1016/j.cell.2012.09.016.
- 1078   Cline, Melissa S, Michael Smoot, Ethan Cerami, Allan Kuchinsky, Neri Landys, Chris Workman,  
1079           Rowan Christmas, et al. 2007. “Integration of Biological Networks and Gene Expression Data  
1080           Using Cytoscape.” *Nature Protocols* 2 (10): 2366–82. doi:10.1038/nprot.2007.324.
- 1081   Cohen, Stephen M. 1993. “Imaginal Disc Development.” *The Development of {Drosophila*  
1082           *Melanogaster}* II. Cold Spring Harbor Laboratory Press: 747–841.
- 1083   Consortium, The Gene Ontology. 2015. “Gene Ontology Consortium: Going Forward.” *Nucleic*  
1084           *Acids Research* 43 (D1). Oxford University Press: D1049–56. doi:10.1093/nar/gku1179.
- 1085   Cummins, Mark, Jose I. Pueyo, Steve A. Greig, and Juan Pablo Couso. 2003. “Comparative  
1086           Analysis of Leg and Antenna Development in Wild-Type and Homeotic *Drosophila*  
1087           *Melanogaster*.” *Development Genes and Evolution* 213 (7): 319–27. doi:10.1007/s00427-  
1088           003-0326-8.
- 1089   Dai, P, H Akimaru, Y Tanaka, D X Hou, T Yasukawa, C Kanei-Ishii, T Takahashi, and S Ishii.

- 1090 1996. "CBP as a Transcriptional Coactivator of c-Myb." *Genes & Development* 10 (5): 528–  
1091 40.
- 1092 Daines, Bryce, H. Wang, L. Wang, Y. Li, Yi Han, David Emmert, William Gelbart, et al. 2011. "The  
1093 *Drosophila Melanogaster* Transcriptome by Paired-End RNA Sequencing." *Genome*  
1094 *Research* 21 (2): 315–24. doi:10.1101/gr.107854.110.
- 1095 Deplancke, Bart, Arnab Mukhopadhyay, Wanyuan Ao, Ahmed M. Elewa, Christian A. Grove,  
1096 Natalia J. Martinez, Reynaldo Sequerra, et al. 2006. "A Gene-Centered *C. Elegans* Protein-  
1097 DNA Interaction Network." *Cell* 125 (6): 1193–1205. doi:10.1016/j.cell.2006.04.038.
- 1098 DeSalvo, Michael K., Samantha J. Hindle, Zeid M. Rusan, Souvinh Orng, Mark Eddison, Kyle  
1099 Halliwill, and Roland J. Bainton. 2014. "The *Drosophila* Surface Glia Transcriptome:  
1100 Evolutionary Conserved Blood-Brain Barrier Processes." *Frontiers in Neuroscience* 8  
1101 (November): 1–22. doi:10.3389/fnins.2014.00346.
- 1102 Dey, Bijan Kumar, Xiao-Li Zhao, Emmanuel Popo-Ola, and Ana Regina Campos. 2009. "Mutual  
1103 Regulation of the *Drosophila* Disconnected (Disco) and Distal-Less (Dll) Genes Contributes  
1104 to Proximal-Distal Patterning of Antenna and Leg." *Cell and Tissue Research* 338 (2): 227–  
1105 40. doi:10.1007/s00441-009-0865-z.
- 1106 Domínguez, M. 1999. "Dual Role for Hedgehog in the Regulation of the Proneural Gene *Atonal*  
1107 during Ommatidia Development." *Development (Cambridge, England)* 126 (11): 2345–53.
- 1108 Domínguez, María, and Fernando Casares. 2005. "Organ Specification-Growth Control  
1109 Connection: New in-Sights from the *Drosophila* Eye-Antennal Disc." *Developmental*  
1110 *Dynamics* 232 (3): 673–84. doi:10.1002/dvdy.20311.
- 1111 Domínguez, María, and Ernst Hafen. 1997. "Hedgehog Directly Controls Initiation and  
1112 Propagation of Retinal Differentiation in the *Drosophila* Eye." *Genes and Development* 11

- 1113 (23): 3254–64. doi:10.1101/gad.11.23.3254.
- 1114 Dong, P D, J Chu, and G Panganiban. 2000. “Coexpression of the Homeobox Genes Distal-Less  
1115 and Homothorax Determines Drosophila Antennal Identity.” *Development (Cambridge,  
1116 England)* 127 (2): 209–16.
- 1117 Dong, P D Si, Jennifer Scholz Dicks, and Grace Panganiban. 2002. “Distal-Less and Homothorax  
1118 Regulate Multiple Targets to Pattern the Drosophila Antenna.” *Development (Cambridge,  
1119 England)* 129 (8): 1967–74.
- 1120 Edwards, J S, L S Swales, and M Bate. 1993. “The Differentiation between Neuroglia and  
1121 Connective Tissue Sheath in Insect Ganglia Revisited: The Neural Lamella and Perineurial  
1122 Sheath Cells Are Absent in a Mesodermless Mutant of Drosophila.” *The Journal of  
1123 Comparative Neurology* 333 (2): 301–8. doi:10.1002/cne.903330214.
- 1124 Edwards, Tara N., and Ian a. Meinertzhagen. 2010. “The Functional Organisation of Glia in the  
1125 Adult Brain of Drosophila and Other Insects.” *Progress in Neurobiology* 90 (4). Elsevier Ltd:  
1126 471–97. doi:10.1016/j.pneurobio.2010.01.001.
- 1127 Edwards, Tara N, Andrea C Nuschke, Aljoscha Nern, and Ian A Meinertzhagen. 2012.  
1128 “Organization and Metamorphosis of Glia in the Drosophila Visual System.” *The Journal of  
1129 Comparative Neurology* 520 (10): 2067–85. doi:10.1002/cne.23071.
- 1130 Elliott, Jimmy, Christine Jolicoeur, Vasanth Ramamurthy, and Michel Cayouette. 2008. “Ikaros  
1131 Confers Early Temporal Competence to Mouse Retinal Progenitor Cells.” *Neuron* 60 (1): 26–  
1132 39. doi:10.1016/j.neuron.2008.08.008.
- 1133 Frankfort, Benjamin J, and Graeme Mardon. 2002. “R8 Development in the Drosophila Eye: A  
1134 Paradigm for Neural Selection and Differentiation.” *Development (Cambridge, England)* 129  
1135 (6): 1295–1306.

- 1136 Franzdóttir, Sigrídur Rut, Daniel Engelen, Yeliz Yuva-Aydemir, Imke Schmidt, Annukka Aho, and  
1137 Christian Klämbt. 2009. “Switch in FGF Signalling Initiates Glial Differentiation in the  
1138 *Drosophila* Eye.” *Nature* 460 (7256). Macmillan Publishers Limited. All rights reserved: 758–  
1139 61. doi:10.1038/nature08167.
- 1140 Gao, Haixia, Xingjuan Chen, Xiaona Du, Bingcai Guan, Yani Liu, and Hailin Zhang. 2011. “EGF  
1141 Enhances the Migration of Cancer Cells by up-Regulation of TRPM7.” *Cell Calcium* 50 (6).  
1142 Elsevier Ltd: 559–68. doi:10.1016/j.ceca.2011.09.003.
- 1143 Garcia-Bellido, a, and J R Merriam. 1969. “Cell Lineage of the Imaginal Discs in *Drosophila*  
1144 Gynandromorphs.” *The Journal of Experimental Zoology* 170 (1): 61–75.  
1145 doi:10.1002/jez.1401700106.
- 1146 Grosskortenhaus, Ruth, Bret J Pearson, Amanda Marusich, and Chris Q Doe. 2005. “Regulation  
1147 of Temporal Identity Transitions in *Drosophila* Neuroblasts.” *Developmental Cell* 8 (2): 193–  
1148 202. doi:10.1016/j.devcel.2004.11.019.
- 1149 Gunthorpe, D, K E Beatty, and M V Taylor. 1999. “Different Levels, but Not Different Isoforms, of  
1150 the *Drosophila* Transcription Factor DMEF2 Affect Distinct Aspects of Muscle Differentiation.”  
1151 *Developmental Biology* 215 (1): 130–45. doi:10.1006/dbio.1999.9449.
- 1152 Heberlein, U, C M Singh, a Y Luk, and T J Donohoe. 1995. “Growth and Differentiation in the  
1153 *Drosophila* Eye Coordinated by Hedgehog.” *Nature* 373 (6516): 709–11.  
1154 doi:10.1038/373709a0.
- 1155 Heberlein, U, and J E Treisman. 2000. “Early Retinal Development in *Drosophila*.” *Results and*  
1156 *Problems in Cell Differentiation* 31: 37–50.
- 1157 Heinz, Sven, Christopher Benner, Nathanael Spann, Eric Bertolino, Yin C. Lin, Peter Laslo, Jason  
1158 X. Cheng, Cornelis Murre, Harinder Singh, and Christopher K. Glass. 2010. “Simple

- 1159 Combinations of Lineage-Determining Transcription Factors Prime Cis-Regulatory Elements  
1160 Required for Macrophage and B Cell Identities.” *Molecular Cell* 38 (4): 576–89.  
1161 doi:10.1016/j.molcel.2010.05.004.
- 1162 Herboso, Leire, Marisa M Oliveira, Ana Talamillo, Coralía Pérez, Monika González, David Martín,  
1163 James D Sutherland, Alexander W Shingleton, Christen K Mirth, and Rosa Barrio. 2015.  
1164 “Ecdysone Promotes Growth of Imaginal Discs through the Regulation of Thor in *D.*  
1165 *Melanogaster*.” *Scientific Reports* 5 (July). Nature Publishing Group: 12383.  
1166 doi:10.1038/srep12383.
- 1167 Herrmann, Carl, Bram Van de Sande, Delphine Potier, and Stein Aerts. 2012. “l-cisTarget: An  
1168 Integrative Genomics Method for the Prediction of Regulatory Features and Cis-Regulatory  
1169 Modules.” *Nucleic Acids Research* 40 (15): e114. doi:10.1093/nar/gks543.
- 1170 Homem, C. C. F., and J. A. Knoblich. 2012. “Drosophila Neuroblasts: A Model for Stem Cell  
1171 Biology.” *Development* 139 (23): 4297–4310. doi:10.1242/dev.080515.
- 1172 Hummel, Thomas, Suzanne Attix, Dorian Gunning, and S.Lawrence Lawrence Zipursky. 2002.  
1173 “Temporal Control of Glial Cell Migration in the Drosophila Eye Requires Gilgamesh,  
1174 Hedgehog, and Eye Specification Genes.” *Neuron* 33 (2): 193–203. doi:10.1016/S0896-  
1175 6273(01)00581-5.
- 1176 Iadecola, Costantino, and Maiken Nedergaard. 2007. “Glial Regulation of the Cerebral  
1177 Microvasculature.” *Nature Neuroscience* 10 (11): 1369–76. doi:10.1038/nn2003.
- 1178 Ideker, Trey, V Thorsson, J A Ranish, R Christmas, J Buhler, J K Eng, R Bumgarner, D R Goodlett,  
1179 R Aebersold, and L Hood. 2001. “Integrated Genomic and Proteomic Analyses of a  
1180 Systematically Perturbed Metabolic Network.” *Science (New York, N.Y.)* 292 (5518): 929–  
1181 34. doi:10.1126/science.292.5518.929.



- 1182 Isshiki, Takako, Bret Pearson, Scott Holbrook, and Chris Q Doe. 2001. "Drosophila Neuroblasts  
1183       Sequentially Express Transcription Factors Which Specify the Temporal Identity of Their  
1184       Neuronal Progeny." *Cell* 106 (4): 511–21. doi:10.1016/S0092-8674(01)00465-2.
- 1185 Ito, Kei, Joachim Urban, and Gerhard Martin Technau. 1995. "Distribution, Classification, and  
1186       Development of Drosophila Glial Cells in the Late Embryonic and Early Larval Ventral Nerve  
1187       Cord." *Roux's Archives of Developmental Biology* 204 (5): 284–307.  
1188       doi:10.1007/BF02179499.
- 1189 Jarman, a P, E H Grell, L Ackerman, L Y Jan, and Y N Jan. 1994. "Atonal Is the Proneural Gene  
1190       for Drosophila Photoreceptors." *Nature* 369 (6479): 398–400. doi:10.1038/369398a0.
- 1191 Jarman, a P, Y Sun, L Y Jan, and Y N Jan. 1995. "Role of the Proneural Gene, Atonal, in Formation  
1192       of Drosophila Chordotonal Organs and Photoreceptors." *Development (Cambridge, England)*  
1193       121 (7): 2019–30.
- 1194 Jarvis, Lesley a. 2006. "Sprouty Proteins Are in Vivo Targets of Corkscrew/SHP-2 Tyrosine  
1195       Phosphatases." *Development* 133 (6): 1133–42. doi:10.1242/dev.02255.
- 1196 Jiménez, Fernando, and José A. Campos-Ortega. 1990. "Defective Neuroblast Commitment in  
1197       Mutants of the Achaete-Scute Complex and Adjacent Genes of *D. Melanogaster*." *Neuron* 5  
1198       (1): 81–89. doi:10.1016/0896-6273(90)90036-F.
- 1199 Jockusch, Elizabeth L, and Frank W Smith. 2015. "Hexapoda: Comparative Aspects of Later  
1200       Embryogenesis and Metamorphosis." In *Evolutionary Developmental Biology of*  
1201       *Invertebrates 5: Ecdysozoa III: Hexapoda*, edited by Andreas Wanninger, 111–208. Vienna:  
1202       Springer Vienna. doi:10.1007/978-3-7091-1868-9\_3.
- 1203 Junion, Guillaume, Mikhail Spivakov, Charles Girardot, Martina Braun, E. Hilary Gustafson, Ewan  
1204       Birney, and Eileen E. M. E. E. M. Furlong. 2012. "A Transcription Factor Collective Defines

- 1205 Cardiac Cell Fate and Reflects Lineage History.” *Cell* 148 (3): 473–86.  
1206 doi:10.1016/j.cell.2012.01.030.
- 1207 Jusiak, Barbara, Umesh C Karandikar, Su-Jin Kwak, Feng Wang, Hui Wang, Rui Chen, and  
1208 Graeme Mardon. 2014. “Regulation of Drosophila Eye Development by the Transcription  
1209 Factor Sine Oculis.” Edited by Justin Kumar. *PloS One* 9 (2): e89695.  
1210 doi:10.1371/journal.pone.0089695.
- 1211 Juven-Gershon, Tamar, Jer-Yuan Hsu, and James T Kadonaga. 2008. “Caudal, a Key  
1212 Developmental Regulator, Is a DPE-Specific Transcriptional Factor.” *Genes & Development*  
1213 22 (20): 2823–30. doi:10.1101/gad.1698108.
- 1214 Kambadur, Ravi, Keita Koizumi, Chad Stivers, James Nagle, Stephen J. Poole, and Ward F.  
1215 Odenwald. 1998. “Regulation of POU Genes by Castor and Hunchback Establishes Layered  
1216 Compartments in the Drosophila CNS.” *Genes & Development* 12 (2): 246–60.  
1217 doi:10.1101/gad.12.2.246.
- 1218 Kango-Singh, Madhuri, Amit Singh, and Y. Henry Sun. 2003. “Eyeless Collaborates with  
1219 Hedgehog and Decapentaplegic Signaling in Drosophila Eye Induction.” *Developmental*  
1220 *Biology* 256 (1): 48–60. doi:10.1016/S0012-1606(02)00123-9.
- 1221 Kemmeren, Patrick, Katrin Sameith, Loes A.L. van de Pasch, Joris J. Benschop, Tineke L.  
1222 Lenstra, Thanasis Margaritis, Eoghan O’Duibhir, et al. 2014. “Large-Scale Genetic  
1223 Perturbations Reveal Regulatory Networks and an Abundance of Gene-Specific  
1224 Repressors.” *Cell* 157 (3). Elsevier: 740–52. doi:10.1016/j.cell.2014.02.054.
- 1225 Kent, W James, Charles W Sugnet, Terrence S Furey, Krishna M Roskin, Tom H Pringle, Alan M  
1226 Zahler, and David Haussler. 2002. “The Human Genome Browser at UCSC.” *Genome*  
1227 *Research* 12 (6): 996–1006. doi:10.1101/gr.229102.

- 1228 Kenyon, Kristy L., Swati S. Ranade, Jennifer Curtiss, Marek Mlodzik, and Francesca Pignoni.  
1229 2003. "Coordinating Proliferation and Tissue Specification to Promote Regional Identity in the  
1230 *Drosophila* Head." *Developmental Cell* 5 (3): 403–14. doi:10.1016/S1534-5807(03)00243-0.
- 1231 Kim, Hong Joo, and Dafna Bar-Sagi. 2004. "Modulation of Signalling by Sprouty: A Developing  
1232 Story." *Nature Reviews Molecular Cell Biology* 5 (6): 441–50. doi:10.1038/nrm1400.
- 1233 Klein, Thomas. 2008. "Immunolabeling of Imaginal Discs." *Methods in Molecular Biology (Clifton,*  
1234 *N.J.)* 420. Humana Press Inc.: 253–63. doi:10.1007/978-1-59745-583-1\_15.
- 1235 Koestler, Stefan A, Begum Alaybeyoglu, Christian X Weichenberger, and Arzu Celik. 2015.  
1236 "FlyOde - a Platform for Community Curation and Interactive Visualization of Dynamic Gene  
1237 Regulatory Networks in *Drosophila* Eye Development [ Version 1 ; Referees : Awaiting Peer  
1238 Review ]." *F1000Research* 4 (1): 1–6. doi:10.12688/f1000research.7556.1.
- 1239 Kosman, David, Stephen Small, and J. Reinitz. 1998. "Rapid Preparation of a Panel of Polyclonal  
1240 Antibodies to *Drosophila* Segmentation Proteins." *Development Genes and Evolution* 208  
1241 (5): 290–94. doi:10.1007/s004270050184.
- 1242 Kramer, S, M Okabe, N Hacohen, M A Krasnow, and Y Hiromi. 1999. "Sprouty: A Common  
1243 Antagonist of FGF and EGF Signaling Pathways in *Drosophila*." *Development (Cambridge,*  
1244 *England)* 126 (11): 2515–25.
- 1245 Kumar, Arun, Tripti Gupta, Sara Berzsenyi, Angela Giangrande, B. Aigouy, V. Van de Bor, M.  
1246 Boeglin, et al. 2015. "N-Cadherin Negatively Regulates Collective *Drosophila* Glial Migration  
1247 through Actin Cytoskeleton Remodeling." *Journal of Cell Science* 128 (5). The Company of  
1248 Biologists Ltd: 900–912. doi:10.1242/jcs.157974.
- 1249 Kumar, J P, and K Moses. 2001. "EGF Receptor and Notch Signaling Act Upstream of  
1250 Eyeless/Pax6 to Control Eye Specification." *Cell* 104 (5): 687–97. doi:10.1016/S0092-

- 1251 8674(02)08063-7.
- 1252 Kumar, Justin P, Tazeen Jamal, Alex Doetsch, F Rudolf Turner, and Joseph B Duffy. 2004. "CREB  
1253 Binding Protein Functions during Successive Stages of Eye Development in Drosophila."  
1254 *Genetics* 168 (2): 877–93. doi:10.1534/genetics.104.029850.
- 1255 Kurata, S, M J Go, S Artavanis-Tsakonas, and W J Gehring. 2000. "Notch Signaling and the  
1256 Determination of Appendage Identity." *Proceedings of the National Academy of Sciences of  
1257 the United States of America* 97 (5): 2117–22. doi:10.1073/pnas.040556497.
- 1258 Kwok, R P, J R Lundblad, J C Chrivia, J P Richards, H P Bächinger, R G Brennan, S G Roberts,  
1259 M R Green, and R H Goodman. 1994. "Nuclear Protein CBP Is a Coactivator for the  
1260 Transcription Factor CREB." *Nature* 370 (6486): 223–26. doi:10.1038/370223a0.
- 1261 Langmead, Ben, and Steven L Salzberg. 2012. "Fast Gapped-Read Alignment with Bowtie 2."  
1262 *Nature Methods* 9 (4): 357–59. doi:10.1038/nmeth.1923.
- 1263 Lebreton, Gaëlle, Christian Faucher, David L Cribbs, and Corinne Benassayag. 2008. "Timing of  
1264 Wingless Signalling Distinguishes Maxillary and Antennal Identities in Drosophila  
1265 Melanogaster." *Development (Cambridge, England)* 135 (13): 2301–9.  
1266 doi:10.1242/dev.017053.
- 1267 Lee, Tong Ihn, Nicola J Rinaldi, François Robert, Duncan T Odom, Ziv Bar-Joseph, Georg K  
1268 Gerber, Nancy M Hannett, et al. 2002. "Transcriptional Regulatory Networks in  
1269 Saccharomyces Cerevisiae." *Science (New York, N.Y.)* 298 (5594): 799–804.  
1270 doi:10.1126/science.1075090.
- 1271 Lehmann, R, and C Nüsslein-Volhard. 1987. "Hunchback, a Gene Required for Segmentation of  
1272 an Anterior and Posterior Region of the Drosophila Embryo." *Developmental Biology* 119 (2):  
1273 402–17. doi:10.1016/0012-1606(87)90045-5.

- 1274 Li, Heng, Bob Handsaker, Alec Wysoker, Tim Fennell, Jue Ruan, Nils Homer, Gabor Marth,  
1275 Goncalo Abecasis, and Richard Durbin. 2009. "The Sequence Alignment/Map Format and  
1276 SAMtools." *Bioinformatics* 25 (16): 2078–79. doi:10.1093/bioinformatics/btp352.
- 1277 Li, T, and M Bender. 2000. "A Conditional Rescue System Reveals Essential Functions for the  
1278 Ecdysone Receptor (EcR) Gene during Molting and Metamorphosis in *Drosophila*."  
1279 *Development (Cambridge, England)* 127 (13): 2897–2905.
- 1280 Li, Xiao-yong, Stewart MacArthur, Richard Bourgon, David Nix, Daniel A Pollard, Venky N Iyer,  
1281 Aaron Hechmer, et al. 2008. "Transcription Factors Bind Thousands of Active and Inactive  
1282 Regions in the *Drosophila* Blastoderm." Edited by Jim Kadonaga. *PLoS Biology* 6 (2). Public  
1283 Library of Science: e27. doi:10.1371/journal.pbio.0060027.
- 1284 Lilly, B, S Galewsky, A B Firulli, R A Schulz, and E N Olson. 1994. "D-MEF2: A MADS Box  
1285 Transcription Factor Expressed in Differentiating Mesoderm and Muscle Cell Lineages during  
1286 *Drosophila* Embryogenesis." *Proceedings of the National Academy of Sciences of the United  
1287 States of America* 91 (12): 5662–66.
- 1288 Love, M. I., Simon Anders, and Wolfgang Huber. 2014. "Differential Analysis of Count Data - the  
1289 DESeq2 Package," 1–41. doi:10.1101/002832.
- 1290 MacArthur, Stewart, Xiao-Yong Li, Jingyi Li, James B Brown, Hou Cheng Chu, Lucy Zeng, Brandi  
1291 P Grondona, et al. 2009. "Developmental Roles of 21 *Drosophila* Transcription Factors Are  
1292 Determined by Quantitative Differences in Binding to an Overlapping Set of Thousands of  
1293 Genomic Regions." *Genome Biology* 10 (7): R80. doi:10.1186/gb-2009-10-7-r80.
- 1294 MacManes, Matthew D. 2014. "On the Optimal Trimming of High-Throughput mRNA Sequence  
1295 Data." *Frontiers in Genetics* 5 (JAN): 1–7. doi:10.3389/fgene.2014.00013.
- 1296 Maere, Steven, Karel Heymans, and Martin Kuiper. 2005. "BiNGO: A Cytoscape Plugin to Assess

- 1297 Overrepresentation of Gene Ontology Categories in Biological Networks.” *Bioinformatics*  
1298 (*Oxford, England*) 21 (16): 3448–49. doi:10.1093/bioinformatics/bti551.
- 1299 Malartre, Marianne. 2016. “Regulatory Mechanisms of EGFR Signalling during *Drosophila* Eye  
1300 Development.” *Cellular and Molecular Life Sciences*, March. Springer International  
1301 Publishing. doi:10.1007/s00018-016-2153-x.
- 1302 Mao, Yanlan, and Matthew Freeman. 2009. “Fasciclin 2, the *Drosophila* Orthologue of Neural Cell-  
1303 Adhesion Molecule, Inhibits EGF Receptor Signalling.” *Development (Cambridge, England)*  
1304 136 (3): 473–81. doi:10.1242/dev.026054.
- 1305 Mardon, G, N M Solomon, and G M Rubin. 1994. “Dachshund Encodes a Nuclear Protein  
1306 Required for Normal Eye and Leg Development in *Drosophila*.” *Development (Cambridge,*  
1307 *England)* 120 (12): 3473–86.
- 1308 Maurel-Zaffran, C, and J E Treisman. 2000. “Pannier Acts Upstream of Wingless to Direct Dorsal  
1309 Eye Disc Development in *Drosophila*.” *Development (Cambridge, England)* 127 (5): 1007–  
1310 16.
- 1311 McManus, K J, and M J Hendzel. 2001. “CBP, a Transcriptional Coactivator and  
1312 Acetyltransferase.” *Biochemistry and Cell Biology = Biochimie et Biologie Cellulaire* 79 (3):  
1313 253–66.
- 1314 Merrill, V.K.L., F.R. Turner, and T.C. Kaufman. 1987. “A Genetic and Developmental Analysis of  
1315 Mutations in the Deformed Locus in *Drosophila Melanogaster*.” *Developmental Biology* 122  
1316 (2): 379–95. doi:10.1016/0012-1606(87)90303-4.
- 1317 Merrill, V K, R J Diederich, F R Turner, and T C Kaufman. 1989. “A Genetic and Developmental  
1318 Analysis of Mutations in Labial, a Gene Necessary for Proper Head Formation in *Drosophila*  
1319 *Melanogaster*.” *Developmental Biology* 135 (2): 376–91. doi:10.1016/0012-1606(89)90187-

- 1320 5.
- 1321 Mishra, Abhishek Kumar, Bastiaan O.R. Bargmann, Maria Tsachaki, Cornelia Fritsch, and Simon  
1322 G. Sprecher. 2016. “Functional Genomics Identifies Regulators of the Phototransduction  
1323 Machinery in the *Drosophila* Larval Eye and Adult Ocelli.” *Developmental Biology* 410 (2).  
1324 Elsevier: 164–77. doi:10.1016/j.ydbio.2015.12.026.
- 1325 Moberg, Kenneth H, Daphne W Bell, Doke C. R. Wahrer, Daniel A Haber, and Iswar K Hariharan.  
1326 2001. “Archipelago Regulates Cyclin E Levels in *Drosophila* and Is Mutated in Human Cancer  
1327 Cell Lines.” *Nature* 413 (6853): 311–16. doi:10.1038/35095068.
- 1328 Morata, G. 2001. “How *Drosophila* Appendages Develop.” *Nature Reviews. Molecular Cell Biology*  
1329 2 (2): 89–97. doi:10.1038/35052047.
- 1330 Naval-Sánchez, Marina, Delphine Potier, Lotte Haagen, Máximo Sánchez, Sebastian Munck,  
1331 Bram Van De Sande, Fernando Casares, Valerie Christiaens, and Stein Aerts. 2013.  
1332 “Comparative Motif Discovery Combined with Comparative Transcriptomics Yields Accurate  
1333 Targetome and Enhancer Predictions.” *Genome Research* 23 (1): 74–88.  
1334 doi:10.1101/gr.140426.112.
- 1335 Nègre, Nicolas, Christopher D Brown, Lijia Ma, Christopher Aaron Bristow, Steven W Miller, Ulrich  
1336 Wagner, Pouya Kheradpour, et al. 2011. “A Cis-Regulatory Map of the *Drosophila* Genome.”  
1337 *Nature* 471 (7339): 527–31. doi:10.1038/nature09990.
- 1338 Nguyen, H T, R Bodmer, S M Abmayr, J C McDermott, and N A Spoerel. 1994. “D-mef2: A  
1339 *Drosophila* Mesoderm-Specific MADS Box-Containing Gene with a Biphasic Expression  
1340 Profile during Embryogenesis.” *Proceedings of the National Academy of Sciences of the*  
1341 *United States of America* 91 (16): 7520–24.
- 1342 Nüsslein-Volhard, Christiane, and Eric Wieschaus. 1980. “Mutations Affecting Segment Number



1343 and Polarity in *Drosophila*.” *Nature* 287 (5785). Nature Publishing Group: 795–801.  
1344 doi:10.1038/287795a0.

1345 O’Neill, Elizabeth M., Ilaria Rebay, Robert Tjian, and Gerald M. Rubin. 1994. “The Activities of  
1346 Two Ets-Related Transcription Factors Required for *Drosophila* Eye Development Are  
1347 Modulated by the Ras/MAPK Pathway.” *Cell* 78 (1): 137–47. doi:10.1016/0092-  
1348 8674(94)90580-0.

1349 Oros, Sarah M., Meghana Tare, Madhuri Kango-Singh, and Amit Singh. 2010. “Dorsal Eye  
1350 Selector Pannier (Pnr) Suppresses the Eye Fate to Define Dorsal Margin of the *Drosophila*  
1351 Eye.” *Developmental Biology* 346 (2): 258–71. doi:10.1016/j.ydbio.2010.07.030.

1352 Petrif, Fred, Rachel Giles, H., Hans Dauwerse, G., Jasper Saris, J., et al. 1995. “Rubinstein-Taybi  
1353 Syndrome Caused by Mutations in the Transcriptional Co-Activator CBP.” *Nature* 376 (6538):  
1354 348–51. doi:10.1038/376348a0.

1355 Pfeiffer, Barret D, Arnim Jenett, Ann S Hammonds, Teri-T B Ngo, Sima Misra, Christine Murphy,  
1356 Audra Scully, et al. 2008. “Tools for Neuroanatomy and Neurogenetics in *Drosophila*.”  
1357 *Proceedings of the National Academy of Sciences of the United States of America* 105 (28):  
1358 9715–20. doi:10.1073/pnas.0803697105.

1359 Pichaud, Franck, and Fernando Casares. 2000. “Homothorax and Iroquois-C Genes Are Required  
1360 for the Establishment of Territories within the Developing Eye Disc.” *Mechanisms of*  
1361 *Development* 96 (1): 15–25. doi:10.1016/S0925-4773(00)00372-5.

1362 Pinnell, Jamie. 2006. “The Divergent Roles of the Segmentation Gene Hunchback.” *Integrative*  
1363 *and Comparative Biology* 46 (4): 519–32. doi:10.1093/icb/icj054.

1364 Pinsonneault, Robert L, Nasima Mayer, Fahima Mayer, Nebiyu Tegegn, and Roland J Bainton.  
1365 2011. “Novel Models for Studying the Blood-Brain and Blood-Eye Barriers in *Drosophila*.”



- 1366        *Methods in Molecular Biology (Clifton, N.J.)* 686: 357–69. doi:10.1007/978-1-60761-938-  
1367        3\_17.
- 1368        Posnien, Nico, Corinna Hopfen, Maarten Hilbrant, Margarita Ramos-Womack, Sophie Murat,  
1369        Anna Schönauer, Samantha L. Herbert, et al. 2012. “Evolution of Eye Morphology and  
1370        Rhodopsin Expression in the *Drosophila Melanogaster* Species Subgroup.” *PLoS ONE* 7 (5).  
1371        doi:10.1371/journal.pone.0037346.
- 1372        Potier, Delphine, Kristofer Davie, Gert Hulselmans, Marina Naval Sanchez, Lotte Haagen,  
1373        Vân Anh Huynh-Thu, Duygu Koldere, et al. 2014. “Mapping Gene Regulatory Networks in  
1374        *Drosophila* Eye Development by Large-Scale Transcriptome Perturbations and Motif  
1375        Inference.” *Cell Reports* 9 (6): 2290–2303. doi:10.1016/j.celrep.2014.11.038.
- 1376        Quiring, R, U Walldorf, U Kloter, and W J Gehring. 1994. “Homology of the Eyeless Gene of  
1377        *Drosophila* to the Small Eye Gene in Mice and Aniridia in Humans.” *Science (New York, N. Y.)*  
1378        265 (5173): 785–89. doi:10.1126/science.7914031.
- 1379        Rangarajan, Radha, H el ene Courvoisier, and Ulrike Gaul. 2001. “Dpp and Hedgehog Mediate  
1380        Neuron-Glia Interactions in *Drosophila* Eye Development by Promoting the Proliferation and  
1381        Motility of Subretinal Glia.” *Mechanisms of Development* 108 (1–2): 93–103.  
1382        doi:10.1016/S0925-4773(01)00501-9.
- 1383        Rangarajan, R, Q Gong, and U Gaul. 1999. “Migration and Function of Glia in the Developing  
1384        *Drosophila* Eye.” *Development (Cambridge, England)* 126 (15): 3285–92.
- 1385        Rau, Andrea, M elina Gallopin, Gilles Celeux, and Florence Jaffr ezic. 2013. “Data-Based Filtering  
1386        for Replicated High-Throughput Transcriptome Sequencing Experiments.” *Bioinformatics*  
1387        (*Oxford, England*) 29 (17): 2146–52. doi:10.1093/bioinformatics/btt350.
- 1388        Rau, Andrea, Cathy Maugis-Rabusseau, Marie-Laure Martin-Magniette, and Gilles Celeux. 2015.

- 1389 “Co-Expression Analysis of High-Throughput Transcriptome Sequencing Data with Poisson  
1390 Mixture Models.” *Bioinformatics (Oxford, England)* 31 (January): 1420–27.  
1391 doi:10.1093/bioinformatics/btu845.
- 1392 Reichert, Heinrich. 2011. “Drosophila Neural Stem Cells: Cell Cycle Control of Self-Renewal,  
1393 Differentiation, and Termination in Brain Development.” In *Results and Problems in Cell*  
1394 *Differentiation*, edited by Jacek Z. Kubiak, 53:229–46. Results and Problems in Cell  
1395 Differentiation. Berlin, Heidelberg: Springer Berlin Heidelberg. doi:10.1007/978-3-642-  
1396 19065-0.
- 1397 Richardson, Brian E, and Ruth Lehmann. 2010. “Mechanisms Guiding Primordial Germ Cell  
1398 Migration: Strategies from Different Organisms.” *Nature Reviews Molecular Cell Biology* 11  
1399 (1). Nature Publishing Group: 37–49. doi:10.1038/nrm2815.
- 1400 Rochlin, Kate, Shannon Yu, Sudipto Roy, and Mary K. Baylies. 2010. “Myoblast Fusion: When It  
1401 Takes More to Make One.” *Developmental Biology* 341 (1). Elsevier Inc.: 66–83.  
1402 doi:10.1016/j.ydbio.2009.10.024.
- 1403 Roy, Sushmita, Jason Ernst, Peter V Kharchenko, Pouya Kheradpour, Nicolas Negre, Matthew L  
1404 Eaton, Jane M Landolin, et al. 2010. “Identification of Functional Elements and Regulatory  
1405 Circuits by Drosophila modENCODE.” *Science (New York, N.Y.)* 330 (6012): 1787–97.  
1406 doi:10.1126/science.1198374.
- 1407 Sato, Atsushi, and Andrew Tomlinson. 2007. “Dorsal-Ventral Midline Signaling in the Developing  
1408 Drosophila Eye.” *Development (Cambridge, England)* 134 (4): 659–67.  
1409 doi:10.1242/dev.02786.
- 1410 Schröder, Reinhard. 2003. “The Genes Orthodenticle and Hunchback Substitute for Bicoid in the  
1411 Beetle *Tribolium*.” *Nature* 422 (April): 621–25. doi:10.1038/nature01518.1.

- 1412 Schwabe, Tina, Roland J. Bainton, Richard D. Fetter, Ulrike Heberlein, and Ulrike Gaul. 2005.  
1413 "GPCR Signaling Is Required for Blood-Brain Barrier Formation in *Drosophila*." *Cell* 123 (1):  
1414 133–44. doi:10.1016/j.cell.2005.08.037.
- 1415 Serikaku, M. a., and J. E. O'Tousa. 1994. "Sine Oculis Is a Homeobox Gene Required for  
1416 *Drosophila* Visual System Development." *Genetics* 138 (4): 1137–50.
- 1417 Sharma, H S, and P K Dey. 1986. "Influence of Long-Term Immobilization Stress on Regional  
1418 Blood-Brain Barrier Permeability, Cerebral Blood Flow and 5-HT Level in Conscious  
1419 Normotensive Young Rats." *Journal of the Neurological Sciences* 72 (1): 61–76.
- 1420 Sharma, Sreenath V, Daphne W Bell, Jeffrey Settleman, and Daniel A Haber. 2007. "Epidermal  
1421 Growth Factor Receptor Mutations in Lung Cancer." *Nature Reviews Cancer* 7 (3): 169–81.  
1422 doi:10.1038/nrc2088.
- 1423 Shcherbata, Halyna R. 2004. "The Mitotic-to-Endocycle Switch in *Drosophila* Follicle Cells Is  
1424 Executed by Notch-Dependent Regulation of G1/S, G2/M and M/G1 Cell-Cycle Transitions."  
1425 *Development* 131 (13): 3169–81. doi:10.1242/dev.01172.
- 1426 Shen, W, and G Mardon. 1997. "Ectopic Eye Development in *Drosophila* Induced by Directed  
1427 Dachshund Expression." *Development (Cambridge, England)* 124 (1): 45–52.
- 1428 Shilo, B. 2003. "Signaling by the *Drosophila* Epidermal Growth Factor Receptor Pathway during  
1429 Development." *Experimental Cell Research* 284 (1): 140–49. doi:10.1016/S0014-  
1430 4827(02)00094-0.
- 1431 Shilo, B.-Z. 2005. "Regulating the Dynamics of EGF Receptor Signaling in Space and Time."  
1432 *Development* 132 (18): 4017–27. doi:10.1242/dev.02006.
- 1433 Shir-Shapira, Hila, Julia Sharabany, Matan Filderman, Diana Ideses, Avital Ovadia-Shochat,

- 1434 Mattias Mannervik, and Tamar Juven-Gershon. 2015. "Structure-Function Analysis of the  
1435 *Drosophila Melanogaster* Caudal Transcription Factor Provides Insights into Core Promoter-  
1436 Preferential Activation." *The Journal of Biological Chemistry* 290 (28): 17293–305.  
1437 doi:10.1074/jbc.M114.632109.
- 1438 Sieglitz, Florian, Till Matzat, Yeliz Yuva-Aydemir, Helen Neuert, Benjamin Altenhein, and C.  
1439 Klambt. 2013. "Antagonistic Feedback Loops Involving Rau and Sprouty in the *Drosophila*  
1440 Eye Control Neuronal and Glial Differentiation." *Science Signaling* 6 (300): ra96-ra96.  
1441 doi:10.1126/scisignal.2004651.
- 1442 Silies, Marion, Yeliz Yuva, Daniel Engelen, Annukka Aho, Tobias Stork, and Christian Klämbt.  
1443 2007. "Glial Cell Migration in the Eye Disc." *The Journal of Neuroscience : The Official Journal*  
1444 *of the Society for Neuroscience* 27 (48): 13130–39. doi:10.1523/JNEUROSCI.3583-07.2007.
- 1445 Singh, Amit, Jeeder Chan, Joshua J Chern, and Kwang-Wook Choi. 2005. "Genetic Interaction of  
1446 Lobe with Its Modifiers in Dorsoventral Patterning and Growth of the *Drosophila* Eye."  
1447 *Genetics* 171 (1): 169–83. doi:10.1534/genetics.105.044180.
- 1448 Singh, Amit, and Kwang-Wook Choi. 2003. "Initial State of the *Drosophila* Eye before Dorsoventral  
1449 Specification Is Equivalent to Ventral." *Development (Cambridge, England)* 130 (25): 6351–  
1450 60. doi:10.1242/dev.00864.
- 1451 Sivachenko, Anna, Yue Li, Katharine C Abruzzi, and Michael Rosbash. 2013. "The Transcription  
1452 Factor Mef2 Links the *Drosophila* Core Clock to Fas2, Neuronal Morphology, and Circadian  
1453 Behavior." *Neuron* 79 (2): 281–92. doi:10.1016/j.neuron.2013.05.015.
- 1454 Skeath, James B., and Stefan Thor. 2003. "Genetic Control of *Drosophila* Nerve Cord  
1455 Development." *Current Opinion in Neurobiology* 13 (1): 8–15. doi:10.1016/S0959-  
1456 4388(03)00007-2.

- 1457 Skultétyová, I, D Tokarev, and D Jezová. 1998. "Stress-Induced Increase in Blood-Brain Barrier  
1458 Permeability in Control and Monosodium Glutamate-Treated Rats." *Brain Research Bulletin*  
1459 45 (2): 175–78.
- 1460 Snodgrass, Robert E. 1935. "Principles of Insect Morphology" 136 (3447). Ithaca, United States:  
1461 {McGraw-Hill} Book Co: 812–13. <http://www.nature.com/doi/10.1038/136812a0>.
- 1462 Tautz, Diethard, Ruth Lehmann, Harald Schnurch, Reinhard Schuh, Eveline Seifert, Andrea  
1463 Kienlin, Keith Jones, and Herbert Jackle. 1987. "Finger Protein of Novel Structure Encoded  
1464 by Hunchback, a Second Member of the Gap Class of Drosophila Segmentation Genes."  
1465 *Nature* 327 (6121): 383–89.
- 1466 Tavazoie, Saeed, Jason D Hughes, Michael J Campbell, Raymond J Cho, and George M Church.  
1467 1999. "Systematic Determination of Genetic Network Architecture." *Nature Genetics* 22 (3):  
1468 281–85. doi:10.1038/10343.
- 1469 Treisman, J E, and U Heberlein. 1998. "Eye Development in Drosophila: Formation of the Eye  
1470 Field and Control of Differentiation." *Current Topics in Developmental Biology* 39: 119–58.
- 1471 Treisman, Jessica E. 2013. "Retinal Differentiation in Drosophila." *Wiley Interdisciplinary Reviews:*  
1472 *Developmental Biology* 2 (4): 545–57. doi:10.1002/wdev.100.
- 1473 Unhavaithaya, Yingdee, and T. L. Orr-Weaver. 2012. "Polyploidization of Glia in Neural  
1474 Development Links Tissue Growth to Blood-Brain Barrier Integrity." *Genes & Development*  
1475 26 (1): 31–36. doi:10.1101/gad.177436.111.
- 1476 van Genderen, M M, G F Kinds, F C Riemsdag, and R C Hennekam. 2000. "Ocular Features in  
1477 Rubinstein-Taybi Syndrome: Investigation of 24 Patients and Review of the Literature." *The*  
1478 *British Journal of Ophthalmology* 84 (10): 1177–84. doi:10.1136/bjo.84.10.1177.

- 1479 von Hilchen, Christian M, Alvaro E Bustos, Angela Giangrande, Gerhard M Technau, and  
1480 Benjamin Altenhein. 2013. "Predetermined Embryonic Glial Cells Form the Distinct Glial  
1481 Sheaths of the Drosophila Peripheral Nervous System." *Development (Cambridge, England)*  
1482 140 (17): 3657–68. doi:10.1242/dev.093245.
- 1483 Weber, Ursula, Csilla Pataki, Jozsef Mihaly, and Marek Mlodzik. 2008. "Combinatorial Signaling  
1484 by the Frizzled/PCP and Egfr Pathways during Planar Cell Polarity Establishment in the  
1485 Drosophila Eye." *Developmental Biology* 316 (1): 110–23. doi:10.1016/j.ydbio.2008.01.016.
- 1486 Williams, Claire R, Alyssa Baccarella, Jay Z Parrish, and Charles C Kim. 2016. "Trimming of  
1487 Sequence Reads Alters RNA-Seq Gene Expression Estimates." *BMC Bioinformatics* 17 (1).  
1488 BMC Bioinformatics: 103. doi:10.1186/s12859-016-0956-2.
- 1489 Wolff, T, and D F Ready. 1991. "The Beginning of Pattern Formation in the Drosophila Compound  
1490 Eye: The Morphogenetic Furrow and the Second Mitotic Wave." *Development (Cambridge,  
1491 England)* 113 (3): 841–50.
- 1492 Yang, C H, M a Simon, and H McNeill. 1999. "Mirror Controls Planar Polarity and Equator  
1493 Formation Through Repression of Fringe Expression and Through Control of Cell Affinities."  
1494 *Development (Cambridge, England)* 126 (24): 5857–66.
- 1495 Yewale, Chetan, Dipesh Baradia, Imran Vhora, Sushilkumar Patil, and Ambikanandan Misra.  
1496 2013. "Epidermal Growth Factor Receptor Targeting in Cancer: A Review of Trends and  
1497 Strategies." *Biomaterials* 34 (34). Elsevier Ltd: 8690–8707.  
1498 doi:10.1016/j.biomaterials.2013.07.100.
- 1499 Yosef, Nir, Alex K Shalek, Jellert T Gaublomme, Hulin Jin, Youjin Lee, Amit Awasthi, Chuan Wu,  
1500 et al. 2013. "Dynamic Regulatory Network Controlling TH17 Cell Differentiation." *Nature* 496  
1501 (7446): 461–68. doi:10.1038/nature11981.

1502 Yuva-Aydemir, Yeliz, Ann-Christin Bauke, and Christian Klämbt. 2011. "Spinster Controls Dpp  
1503 Signaling during Glial Migration in the Drosophila Eye." *The Journal of Neuroscience : The*  
1504 *Official Journal of the Society for Neuroscience* 31 (19): 7005–15.  
1505 doi:10.1523/JNEUROSCI.0459-11.2011.

1506 Zielke, Norman, Bruce A Edgar, and M. L. DePamphilis. 2013. "Endoreplication." *Cold Spring*  
1507 *Harbor Perspectives in Biology* 5 (1): a012948–a012948. doi:10.1101/cshperspect.a012948.

1508 Zinzen, Robert P., Charles Girardot, Julien Gagneur, Martina Braun, and Eileen E. M. Furlong.  
1509 2009. "Combinatorial Binding Predicts Spatio-Temporal Cis-Regulatory Activity." *Nature* 462  
1510 (7269): 65–70. doi:10.1038/nature08531.

1511

1512

## 1513 **Figures and Tables**

### 1514 **Figure 1. Co-expression clusters.**

1515 All 13 profiles of co-expressed genes predicted by HTSCluster (see Materials and Methods). The  
1516 number of genes assigned to a particular cluster are indicated below the cluster name. Blue dots  
1517 represent relative expression levels (lambda value) of the genes of that cluster (y-axis on the right)  
1518 at each stage. Background grey lines represent the normalized mean count of all genes belonging  
1519 to a cluster (y-axis on the left). Below each cluster plot, the first four non-redundant GO terms  
1520 enriched in the genes of that cluster are listed (see Table S2) and also the significantly enriched  
1521 transcription factors (NES > 3, see Table S3).

### 1522 **Figure 2. *hb* expression in the eye-antennal disc.**

1523 Different detection methods showing *hb* expression in L3 eye-antennal discs. In all pictures,  
1524 anterior is to the right. Eye disc (ed), optic stalk (os). Scale bar = 20  $\mu$ m. **A.** *in-situ* hybridization of  
1525 *hb* mRNA. *hb* is expressed in two large domains (black arrows) at the posterior end of the eye  
1526 field **B.** Antibody staining of Hb protein (rabbit  $\alpha$ -Hb), showing a signal in two large domains (white  
1527 arrows) at the posterior end of the eye field. Co-staining with Phalloidin (**B'**, **B''**) shows that the  
1528 cells expressing *hb* are located between the photoreceptor axons on their way to the optic stalk.  
1529 **C.** Expression of histone-bound RFP (UAS-H2B::RFP) driven by a Gal4 line containing an  
1530 enhancer region near the *hb* locus (VT038544-Gal4 driver line obtained from the Vienna Tile  
1531 collection, see Figure S4 for details). Expression is localized in two large cells (**C'**) (white arrows)  
1532 in the same location as A and B, at the posterior end of the eye field, near the optic stalk (**C''**).

### 1533 **Figure 3. *hb* is expressed in subperineurial glia cells.**

1534 **A.** *hb* expression (VT038544-Gal4 driving UAS-GFP, green) co-localizes (white arrows) with the  
1535 pan-glial marker Repo (detected with rabbit  $\alpha$ -Repo antibody, red). **B.** Hb (detected with rabbit  $\alpha$ -



1536 Hb antibody, red) co-localizes (white arrows) with the expression of the subperineurial glia cell  
1537 marker *moody* (*moody*-Gal4 driving UAS-GFP, green). In all pictures, anterior is to the right. Eye  
1538 disc (ed), optic stalk (os). Scale bar = 20  $\mu$ m.

1539 **Figure 4. *hb* is expressed in cells that migrate from the optic stalk into the eye-antennal**  
1540 **discs.**

1541 *hb*-expressing cells are visualized with VT038544-Gal4 driving histone-bound RFP (UAS-  
1542 H2B::RFP, red) (**A**, **B** and **C**) and all glia cells are stained with rabbit  $\alpha$ -Repo antibody (**A'**, **B'** and  
1543 **C'**). Eye disc (ed), optic stalk (os). Scale bar = 20  $\mu$ m. **A**. During L2 stage, the glia cells expressing  
1544 *hb* are located in the optic stalk (white arrows). **B**. At mid L3 stage, these cells are located at the  
1545 edge between the optic stalk and the retinal region of the eye-antennal disc (white arrows). **C**. At  
1546 late L3 stage, these cells are located in the posterior region of the eye field, on at each side of the  
1547 optic stalk (white arrows).

1548 **Figure 5. The number of polyploid glia cell nuclei is reduced after loss of Hb function.**

1549 **A-C**. Staining with rabbit  $\alpha$ -Repo antibody (red) and Phalloidin (green) of late L3 eye-antennal  
1550 discs in wild type (**A**), *repo* driven *hb* RNAi (**B**) and Hb temperature sensitive mutant (**C**). This  
1551 figure represent the phenotypes that have been analyzed in **D**, where the number of polyploid  
1552 nuclei (white arrows) have been quantified. In all pictures, anterior is to the right. Scale bar = 20  
1553  $\mu$ m. **D**. Quantification of the number of polyploid nuclei observed in wild type (WT), *repo*-Gal4 and  
1554 *moody*-Gal4 driven UAS-*hb* RNAi (*hb*<sup>dsRNA</sup>) and Hb temperature sensitive mutant (Hb<sup>TS</sup>). **E**.  
1555 Quantification of the number of polyploid nuclei observed in late L3 eye-antennal discs of flies that  
1556 have been raised at 18°C until the indicated time points (24h AEL, 48h AEL, 72h AEL and 96h  
1557 AEL), when they have been transferred to the restrictive temperature of 28°C. In **D** and **E**, the  
1558 black bar indicates percentage of discs with two polyploid glia cell nuclei, grey indicates discs with  
1559 one polyploid glia cell nucleus and white indicates discs without polyploid glia cell nuclei.

1560 Pearson's Chi-squared test was performed to determine if the distribution of the different number  
1561 of cells (0, 1 or 2) was equal between wild type and RNAi. \*: p-val < 0.05, \*\*\*: p-val < 0.0005.

1562 **Figure 6. Carpet cell membranes after loss of Hb function.**

1563 Membranes of carpet cells in late L3 eye-antennal discs are labelled with *moody*-Gal4 driven UAS-  
1564 mCD8::GFP expression (green). All glia cells are stained with rabbit  $\alpha$ -Repo antibody (red). Carpet  
1565 cell nuclei (white arrows) are recognized by their large size. In all pictures, anterior is to the right.  
1566 Eye disc (ed), optic stalk (os). Scale bar = 20  $\mu$ m. **A.** In wild type, the membranes of the two carpet  
1567 cells cover all the retinal field up to the edge of the most anteriorly located glia cells. **B-D.**  
1568 Phenotypes observed after *moody* driven *hb* RNAi. In discs where carpet cell nuclei cannot be  
1569 observed, GFP signal is detected only in the optic stalk (**B**). In discs where only one carpet cell  
1570 nucleus can be observed on one side, the membrane signal is predominantly observed on that  
1571 side (**C**). In discs where only one carpet cell can be observed in the disc midline, membrane extend  
1572 to both sides (**D**), but do not extend so far anteriorly as in wild type (compare **D** to **A**).

1573 **Figure 7. Blood-brain barrier function is impaired after loss of *hb* expression in carpet cells.**

1574 **A.** After injection of fluorescently labelled dextran in the abdomen of adult flies, animals with  
1575 correctly formed blood-brain barrier present fluorescence in the body (not shown) but not in the  
1576 compound eye. **A'**. In flies with incomplete blood-brain barrier, fluorescent dye can be observed  
1577 in the compound eye as well as in the body. **B.** Quantification of eyes with (green) or without (red)  
1578 dye penetration. *hb* knock-down flies have a significant increase in the penetrance of dye in the  
1579 eye, indicating a defective blood-eye barrier. Pearson's Chi-squared test was performed to  
1580 determine significance between the wild type results and the RNAi. \*\*\*: p-val < 0.0005.

1581 **Figure 8. Differentially expressed putative Hb target genes.**

1582 Green and red shaded circles are up- and down-regulated genes, respectively. Larger circle size  
1583 indicates higher log<sub>2</sub>-fold change. **A.** 267 genes from the high confidence list of Hb targets are  
1584 differentially expressed in the eye-antennal discs during the transition from late L2 (72h AEL) to  
1585 mid L3 (96h AEL) stages. 33 genes are down-regulated and 234 are up-regulated (see Table S4).  
1586 **B.** 52 genes from the high confidence list of Hb targets are differentially expressed in the eye-  
1587 antennal discs during the transition from mid L3 (96h AEL) to late L3 (120h AEL) stages. 10 genes  
1588 are down-regulated and 42 are up-regulated (see Table S4).

1589 **Figure 9. Expression of Hb target genes in the eye-antennal discs.**

1590 Four of the tested target genes show expression in carpet cells. Eye disc (ed), optic stalk (os).  
1591 Scale bar = 20 μm. **A.** *CadN*-Gal4 drives UAS-GFP expression (green in **A''**) in one of the two  
1592 carpet cells (white arrow), as well as other cells in the disc, possibly glia cells. **A'** and **A''**. Carpet  
1593 cells are recognized by their large cell size with rabbit α-Repo antibody (red). **B.** mouse α-Cut (red  
1594 in **B''**) shows clear signal in the two carpet cells (white arrows). **B'** and **B''**. Carpet cells are  
1595 recognized by *moody*-Gal4 driving UAS-GFP expression (green). DAPI shows the eye-antennal  
1596 disc surface. **C.** *Fas2*-Gal4 drives UAS-H2B::RFP (red in **C''**) expression in the two carpet cells  
1597 (white arrows). **C'** and **C''**. Carpet cells are recognized by their large cell size with DAPI and their  
1598 location on the posterior edge of the retinal field between the outgoing axons visualized with  
1599 Phalloidin staining (green). **D.** *Sty*-Gal4 drives UAS-H2B::RFP (red in **D''**) expression in the two  
1600 carpet cells (white arrows), as well as in other cells in the disc. Due to folding of the imaged disc,  
1601 the right (**D-I**) and left (**D-II**) carpet cells were not found in the same focal plane. **D'** and **D''**.  
1602 Carpet cells are recognized by their large cell size with DAPI and their location on the posterior  
1603 edge of the retinal field between the outgoing axons visualized with Phalloidin staining (green).

1604 **Supplementary Figure 1. Multi-dimension scaling plot of RNA-seq samples.**

1605 **A.** Count data of all three time points (72h AEL, 96h AEL and 120h AEL). **B.** Count data of only  
1606 96h AEL and 120h AEL.

1607 **Supplementary Figure 2. Mef2 driver line expression.**

1608 *Mef2*-expressing cells are visualized with a *Mef2*-Gal4 driver line crossed with UAS-H2B::RFP  
1609 reporter (red).

1610 **Supplementary Figure 3. VT038545 (*hb*-Gal4) driver line expression in late L3 eye-antennal  
1611 discs.**

1612 Driver line VT038545-Gal4 drives UAS-H2B::RFP expression in the two carpet cells. Anterior is to  
1613 the right. Eye disc (ed), optic stalk (os).

1614 **Supplementary Figure 4. Genomic location of Vienna Tile *hb* driver lines.**

1615 Arrows indicate the regions used to drive *hb* expression with Gal4 system. Bellow, are colored  
1616 tracks provided by the BDTNP project (X. Li et al. 2008) showing open chromatin profiles and  
1617 transcription factor binding. The last black tracks show sequence conservation across different  
1618 insect species. These tracks were visualized using UCSC Browser (Kent et al. 2002).

1619 **Supplementary Figure 5. The strength of the effect of loss of Hb function in carpet cells is  
1620 not significantly different at different time points.**

1621 **A.** A significant difference in the distribution of the number of polyploid glia cells in Hb<sup>TS</sup> flies is  
1622 only observed between raising larvae at the restrictive temperature 48h AEL and 72h AEL.  
1623 However, this difference is also significant in the wild type (WT). This can be due to the fact that  
1624 more larvae die when transferred to the restrictive temperature too early (at 24h AEL or 48h AEL).  
1625 **B.** Pearson's Chi-squared test was performed to determine if the distribution of the different

1626 number of cells (0, 1 or 2) was equal across the time points for the same conditions (WT or HB<sup>TS</sup>).

1627 \*: p-val < 0.05, \*\*\*: p-val < 0.0005.

### 1628 **Supplementary Figure 6.**

1629 Hb loss of function affects axon projection and the organization of other  
1630 retinal glia cells. Late L3 eye-antennal discs attached to the optic lobe immunostained with rabbit  
1631  $\alpha$ -Repo (green) and Cy3-conjugated-HRP (red) antibodies. Eye disc (ed), optic stalk (os), optic  
1632 lobe (ol). Scale bar = 20  $\mu$ m. **A.** In wild type larvae, glia cells occupy all the basal surface of the  
1633 eye-antennal disc posterior to the morphogenetic furrow to support the developing photoreceptors  
1634 and their axons. Carpet cell nuclei can be observed at the posterior margin of the eye-antennal  
1635 disc (white arrows). **A'**. Axons project in an organized manner from the developing photoreceptors  
1636 in the eye-antennal disc into the optic lobes through the optic stalk. **B.** In *repo>>hb<sup>dsRNA</sup>* larvae,  
1637 patches without glia cells can be observed in the basal surface of the eye-antennal disc (white  
1638 arrow), and carpet cell nuclei cannot be identified. **B'**. Axons do not project correctly and form  
1639 unorganized bundles (white arrows).

### 1640 **Supplementary Table 1. Differentially expressed genes.**

### 1641 **Supplementary Table 2. Significantly enriched GO terms in the expression clusters.**

### 1642 **Supplementary Table 3. Significantly enriched transcription factors in the expression** 1643 **clusters.**

### 1644 **Supplementary Table 4. Putative Hb target genes differentially expressed.**

1645 Table contains two sheets: first sheet lists putative Hb targets differentially expressed between  
1646 72h AEL and 96h AEL and second sheet lists the differentially expressed genes between 96h AEL  
1647 and 120h AEL. "Instances": number of Hb motifs found  $\pm$ 1000 bp from TTS. Right-side table shows

1648 how many of these genes belong to each cluster and the percentage over the total number of  
1649 genes in that cluster.

1650 **Supplementary Table 5. Putative Hb target genes in clusters 12 and 13.**

1651 Table contains three sheets: first sheet contains the gene ID, name and symbol of the 77 genes,  
1652 and the cluster they belong to; second sheet lists the GO terms associated to each of the 77  
1653 genes; third sheet contains the number of times each GO term appears in the second sheet.

1654

### Cluster 1

693 genes

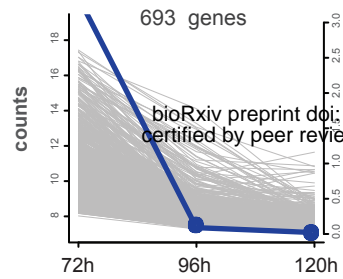

bioRxiv preprint doi: <https://doi.org/10.1101/114363>; this version posted March 8, 2017. The copyright holder for this preprint (which was not certified by peer review) is the author/funder, who has granted bioRxiv a license to display the preprint in perpetuity. It is made available under aCC-BY-NC-ND 4.0 International license.

**GO:** cuticle develop.  
aminoglycan metab. proc.  
body morphog.  
humoral immune response

**TFs:** Cad, Sna, Bap,  
Bin, Ftz

### Cluster 2

656 genes

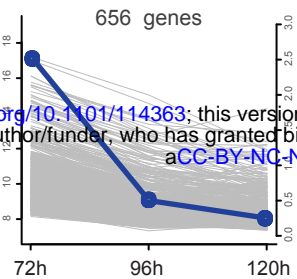

**GO:** oxidation-reduction proc.  
single-organism metab. proc.  
neg. reg. of peptidase activity  
immune response

**TFs:** Cad, Nej, Mef2

### Cluster 3

519 genes

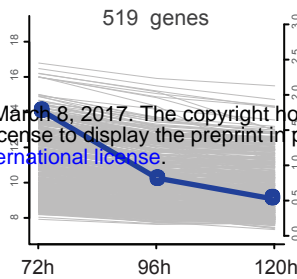

**GO:** ATP metab. proc.  
electron transp. chain  
cellular respiration  
single-organism biosyn. proc.

**TFs:** Nej

### Cluster 4

876 genes

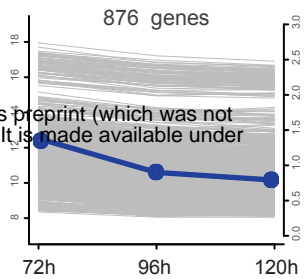

**GO:** translation  
gene expression  
mitotic spindle elongation  
ncRNA metabolic process

**TFs:** Pnr, TflIB, Nej, Med,  
Doc2, Mef2, Mad

### Cluster 5

282 genes

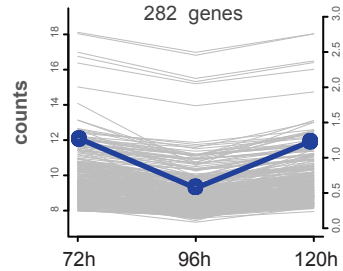

**GO:** -

**TFs:** EcR

### Cluster 6

1341 genes

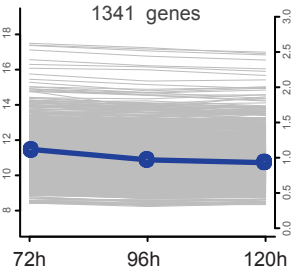

**GO:** cellular metab. proc.  
cellular localization  
tRNA processing  
ribonucleoprotein complex biogenesis

**TFs:** Pnr, TflIB, Doc2, Mad,  
Nej, Bin, Med

### Cluster 7

1274 genes

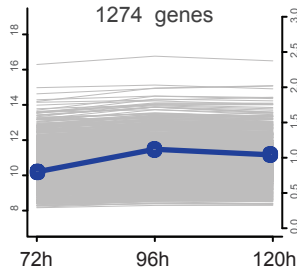

**GO:** cellular macromolecule metab. proc.  
biological regulation  
RNA processing  
cellular response to stress

**TFs:** Pnr, Mad, Doc2,  
Nej

### Cluster 8

282 genes

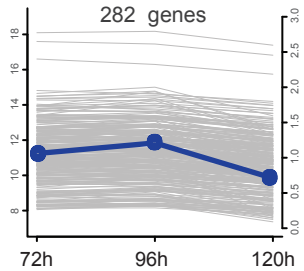

**GO:** DNA replication  
cell cycle  
cytoskeleton organization  
neurogenesis

**TFs:** Nej, Pnr, TflIB

### Cluster 9

585 genes

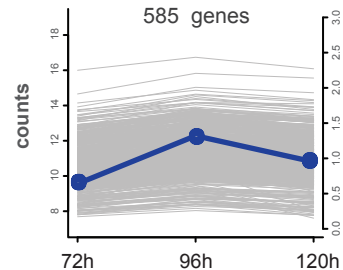

**GO:** cellular component organization  
biological regulation  
cell cycle  
cell differentiation

**TFs:** Pnr, Nej, Mad

### Cluster 10

935 genes

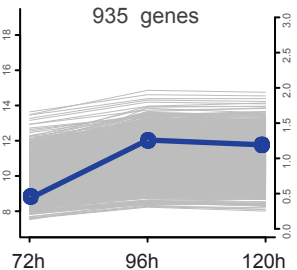

**GO:** biological regulation  
imaginal disc development  
cell differentiation  
generation of neurons

**TFs:** Nej, Dl, Zld, dTcf

### Cluster 11

745 genes

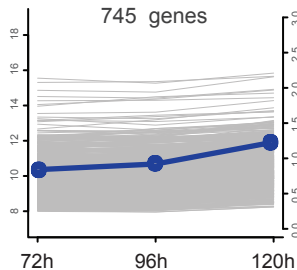

**GO:** biological regulation  
transcription from RNAPolIII promoter  
RNA metabolic proc.  
reg. of cell proliferation

**TFs:** Pnr

### Cluster 12

332 genes

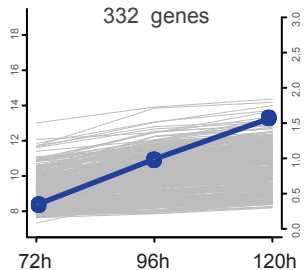

**GO:** system development  
generation of neurons  
taxis  
compound eye morphog.

**TFs:** EcR, Slp1, Hb, Mef2,  
Nej, Tin, Twi, dTcf

### Cluster 13

316 genes

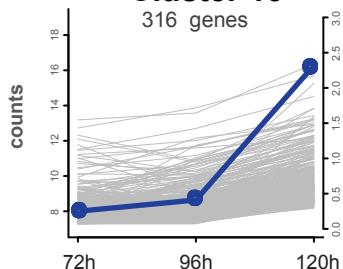

**GO:** generation of neurons  
puparial adhesion  
pigment metab. proc.  
response to stimulus

**TFs:** Mad, Sna, Run,  
EcR, Da, Hb



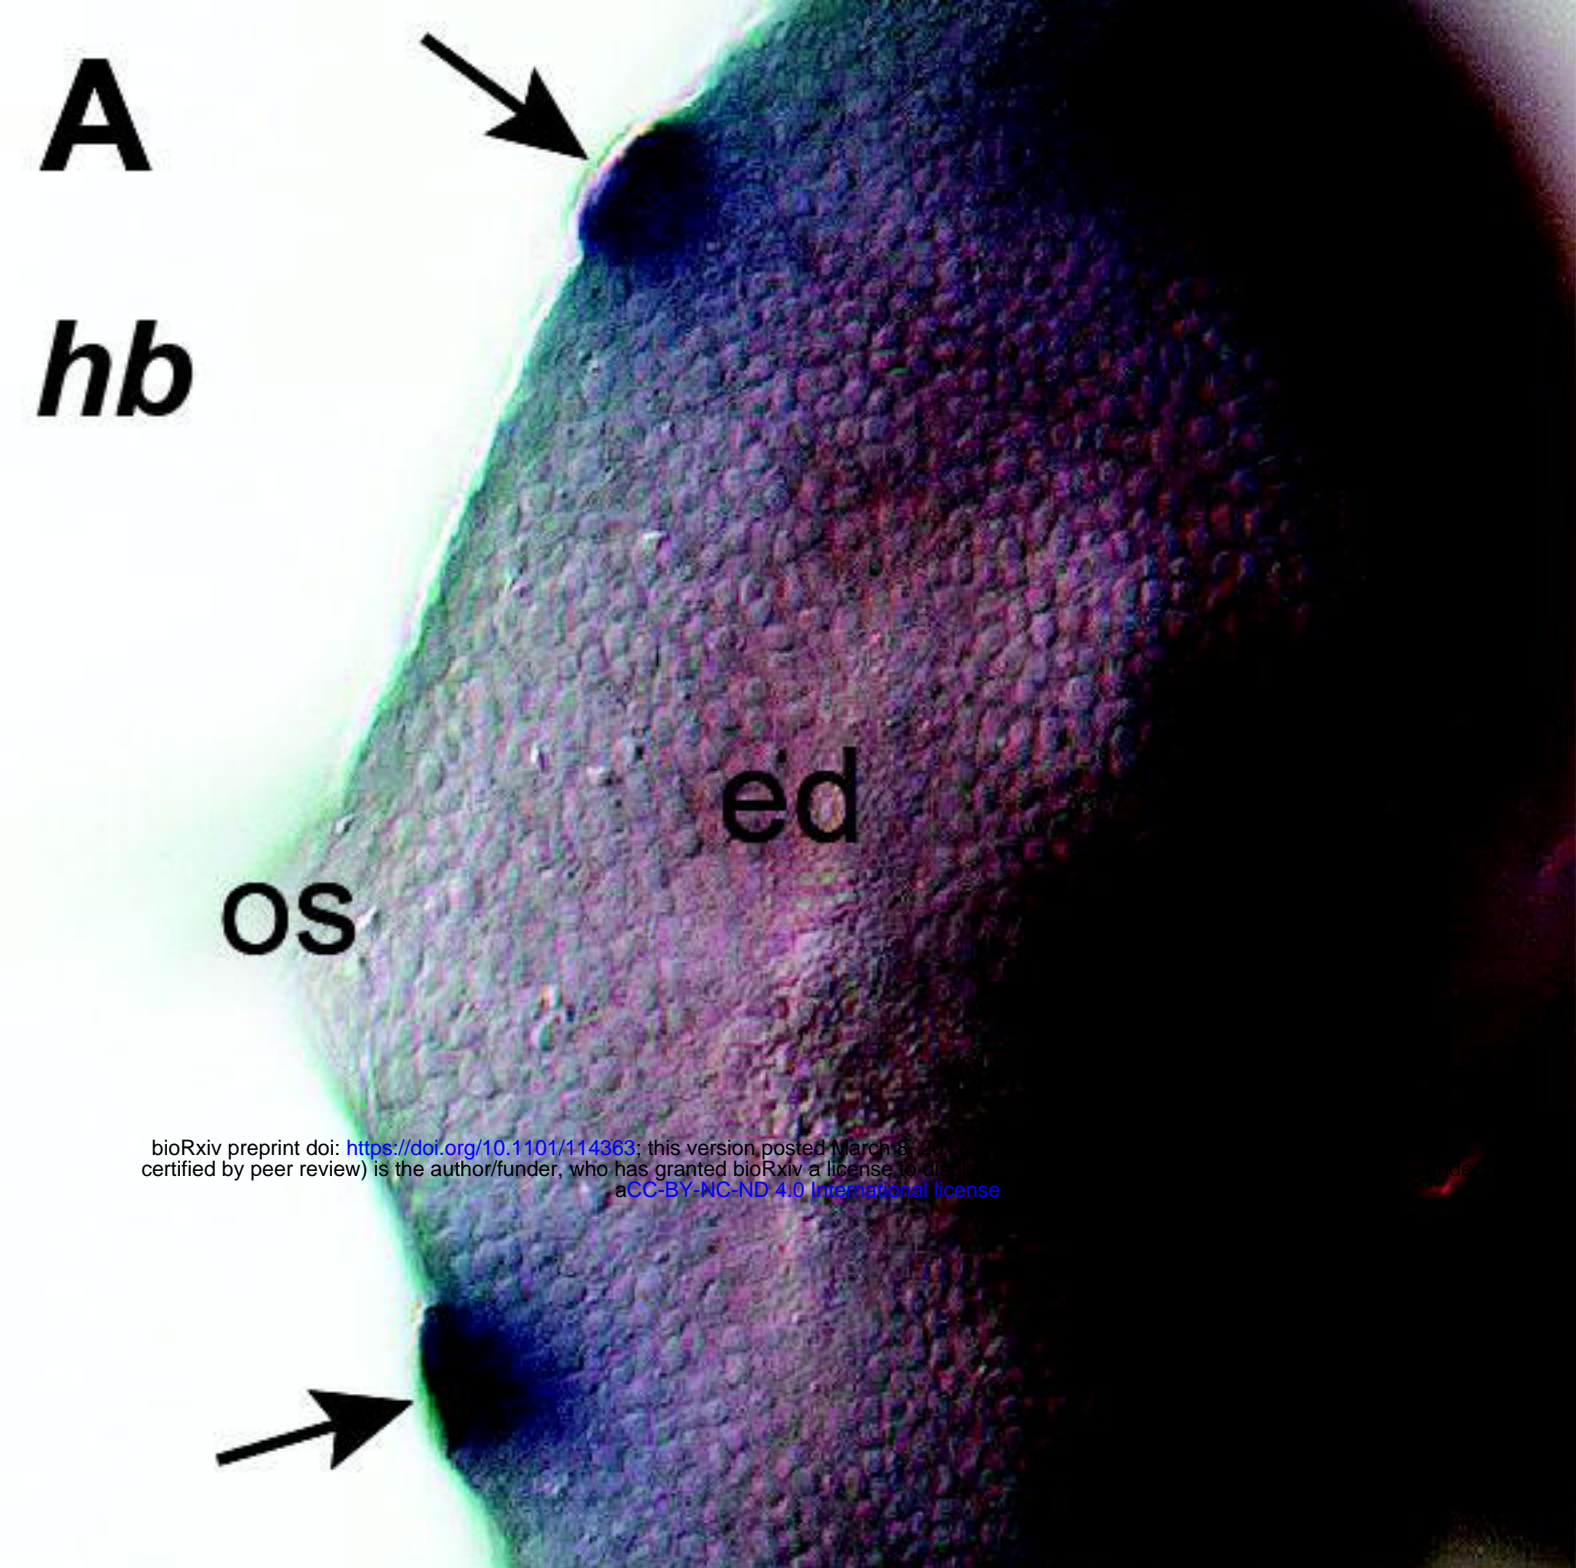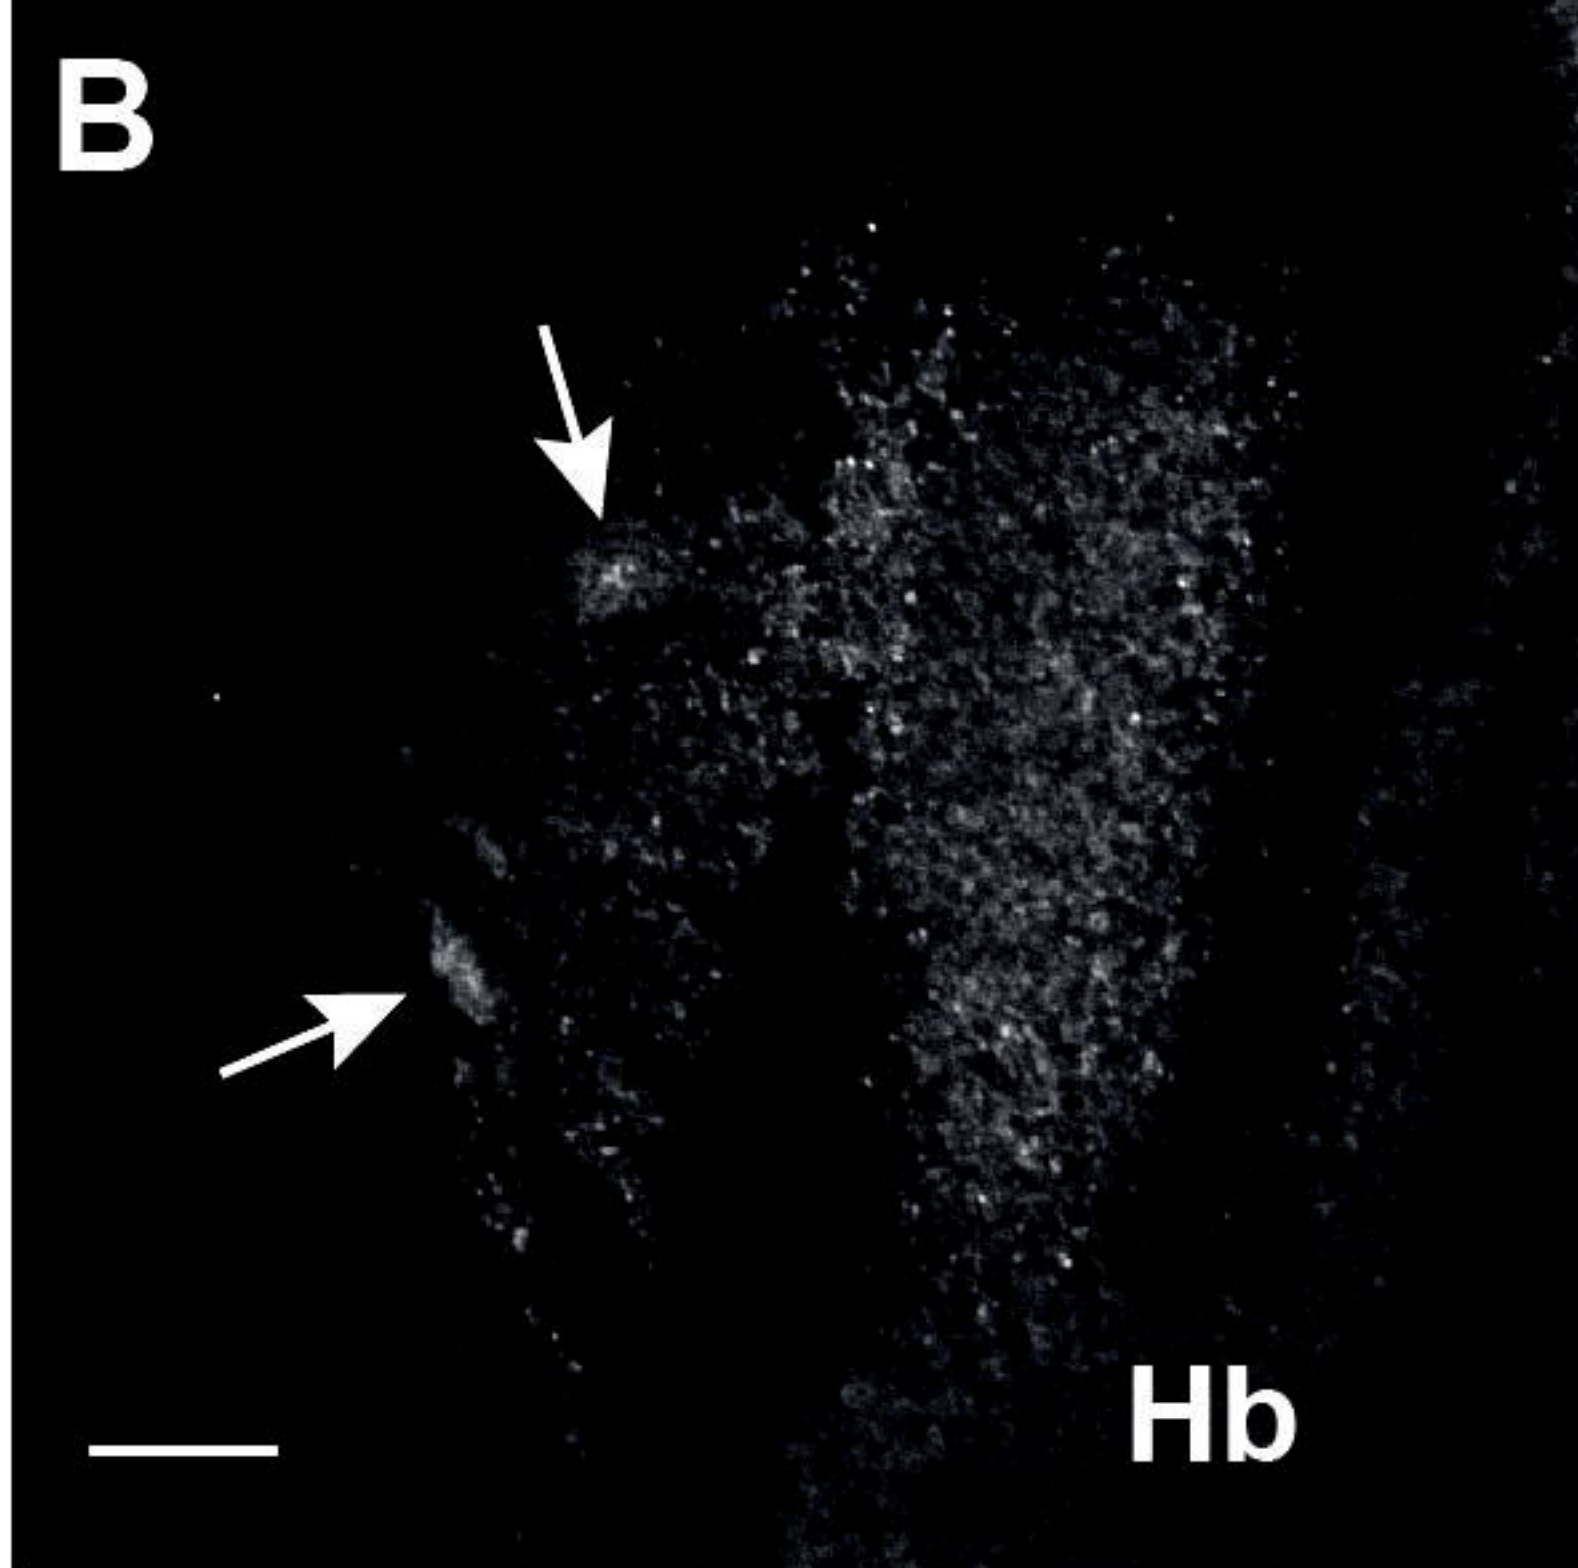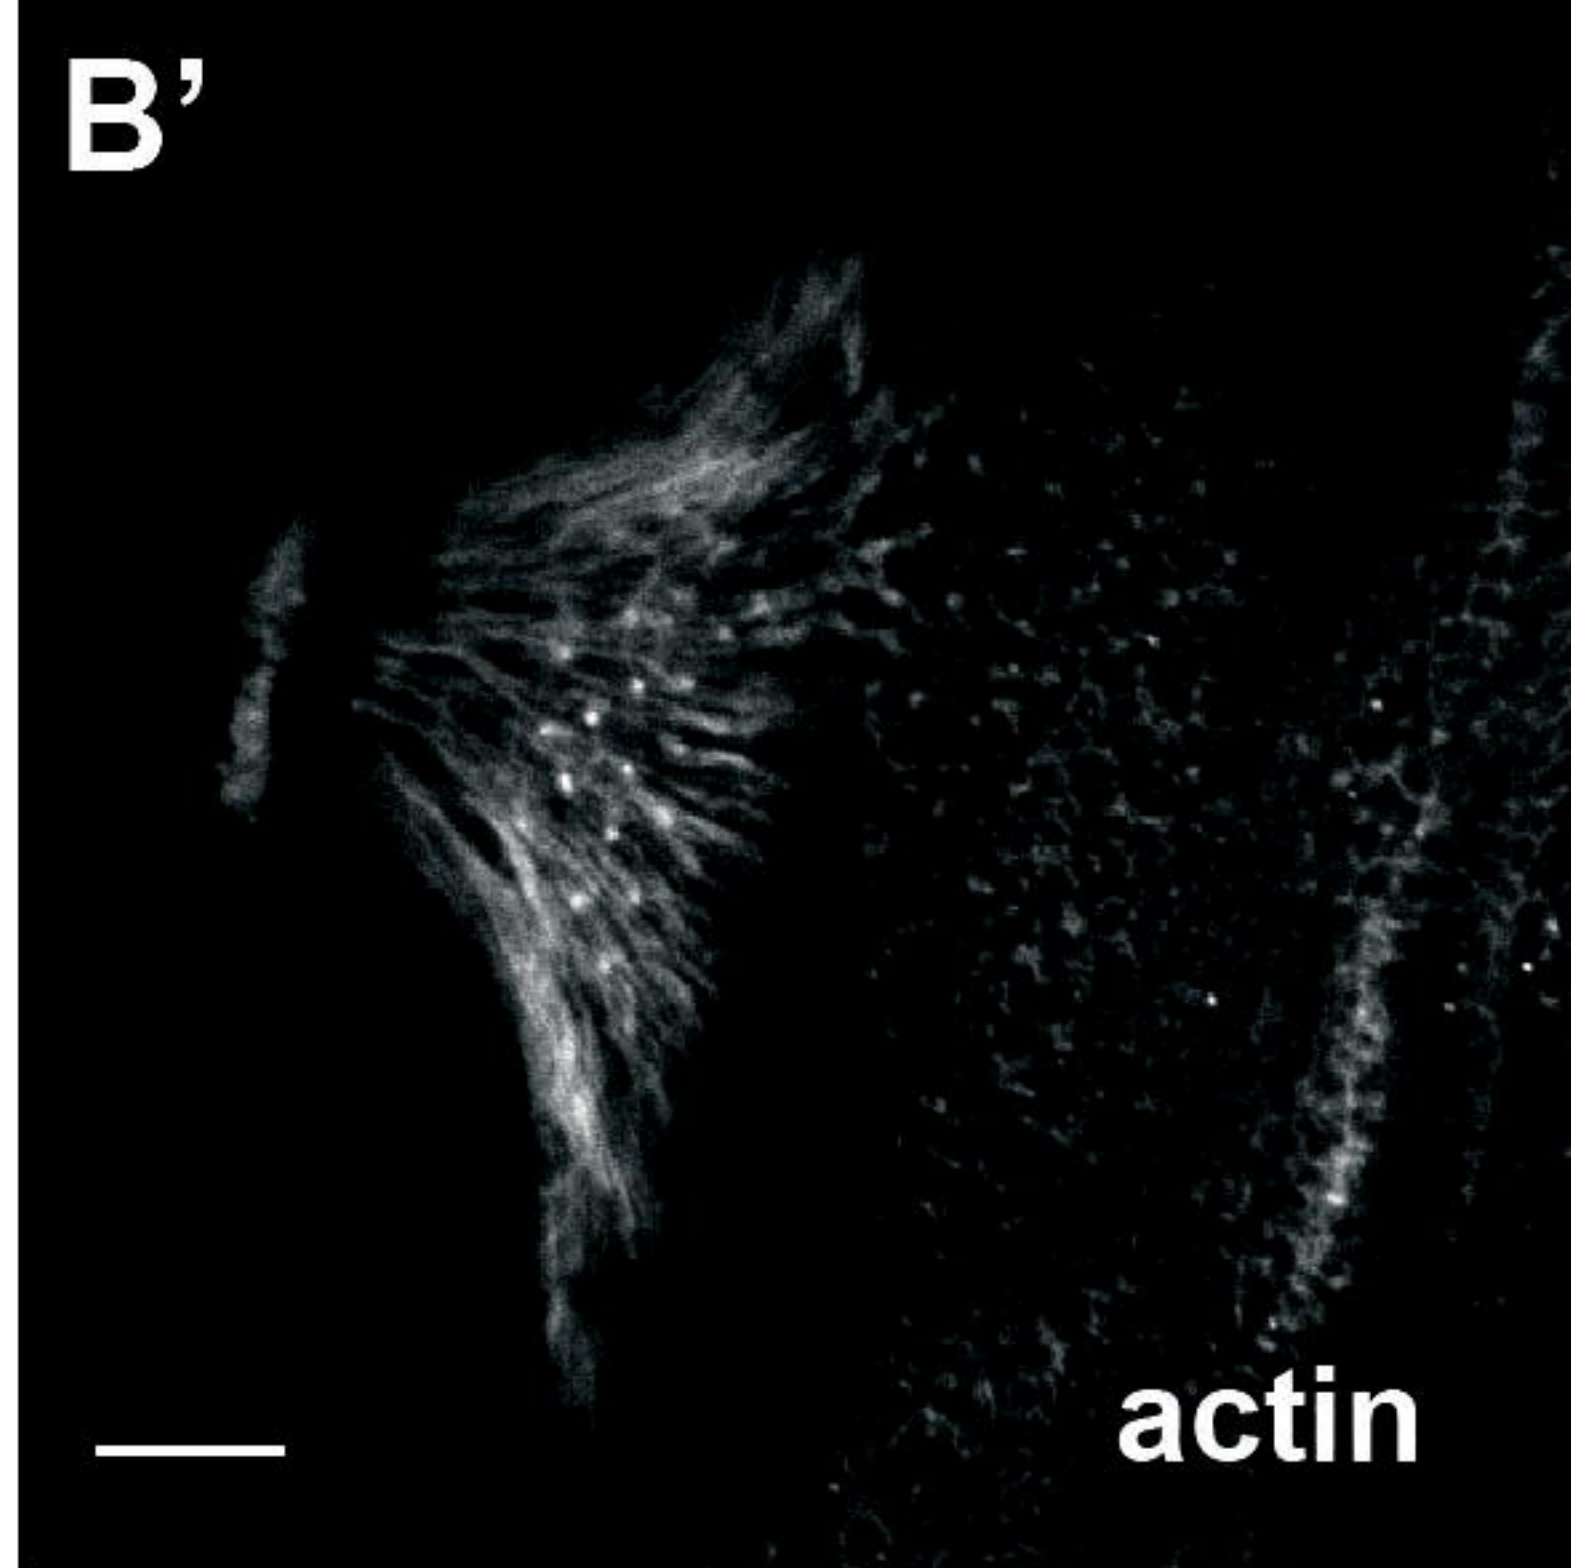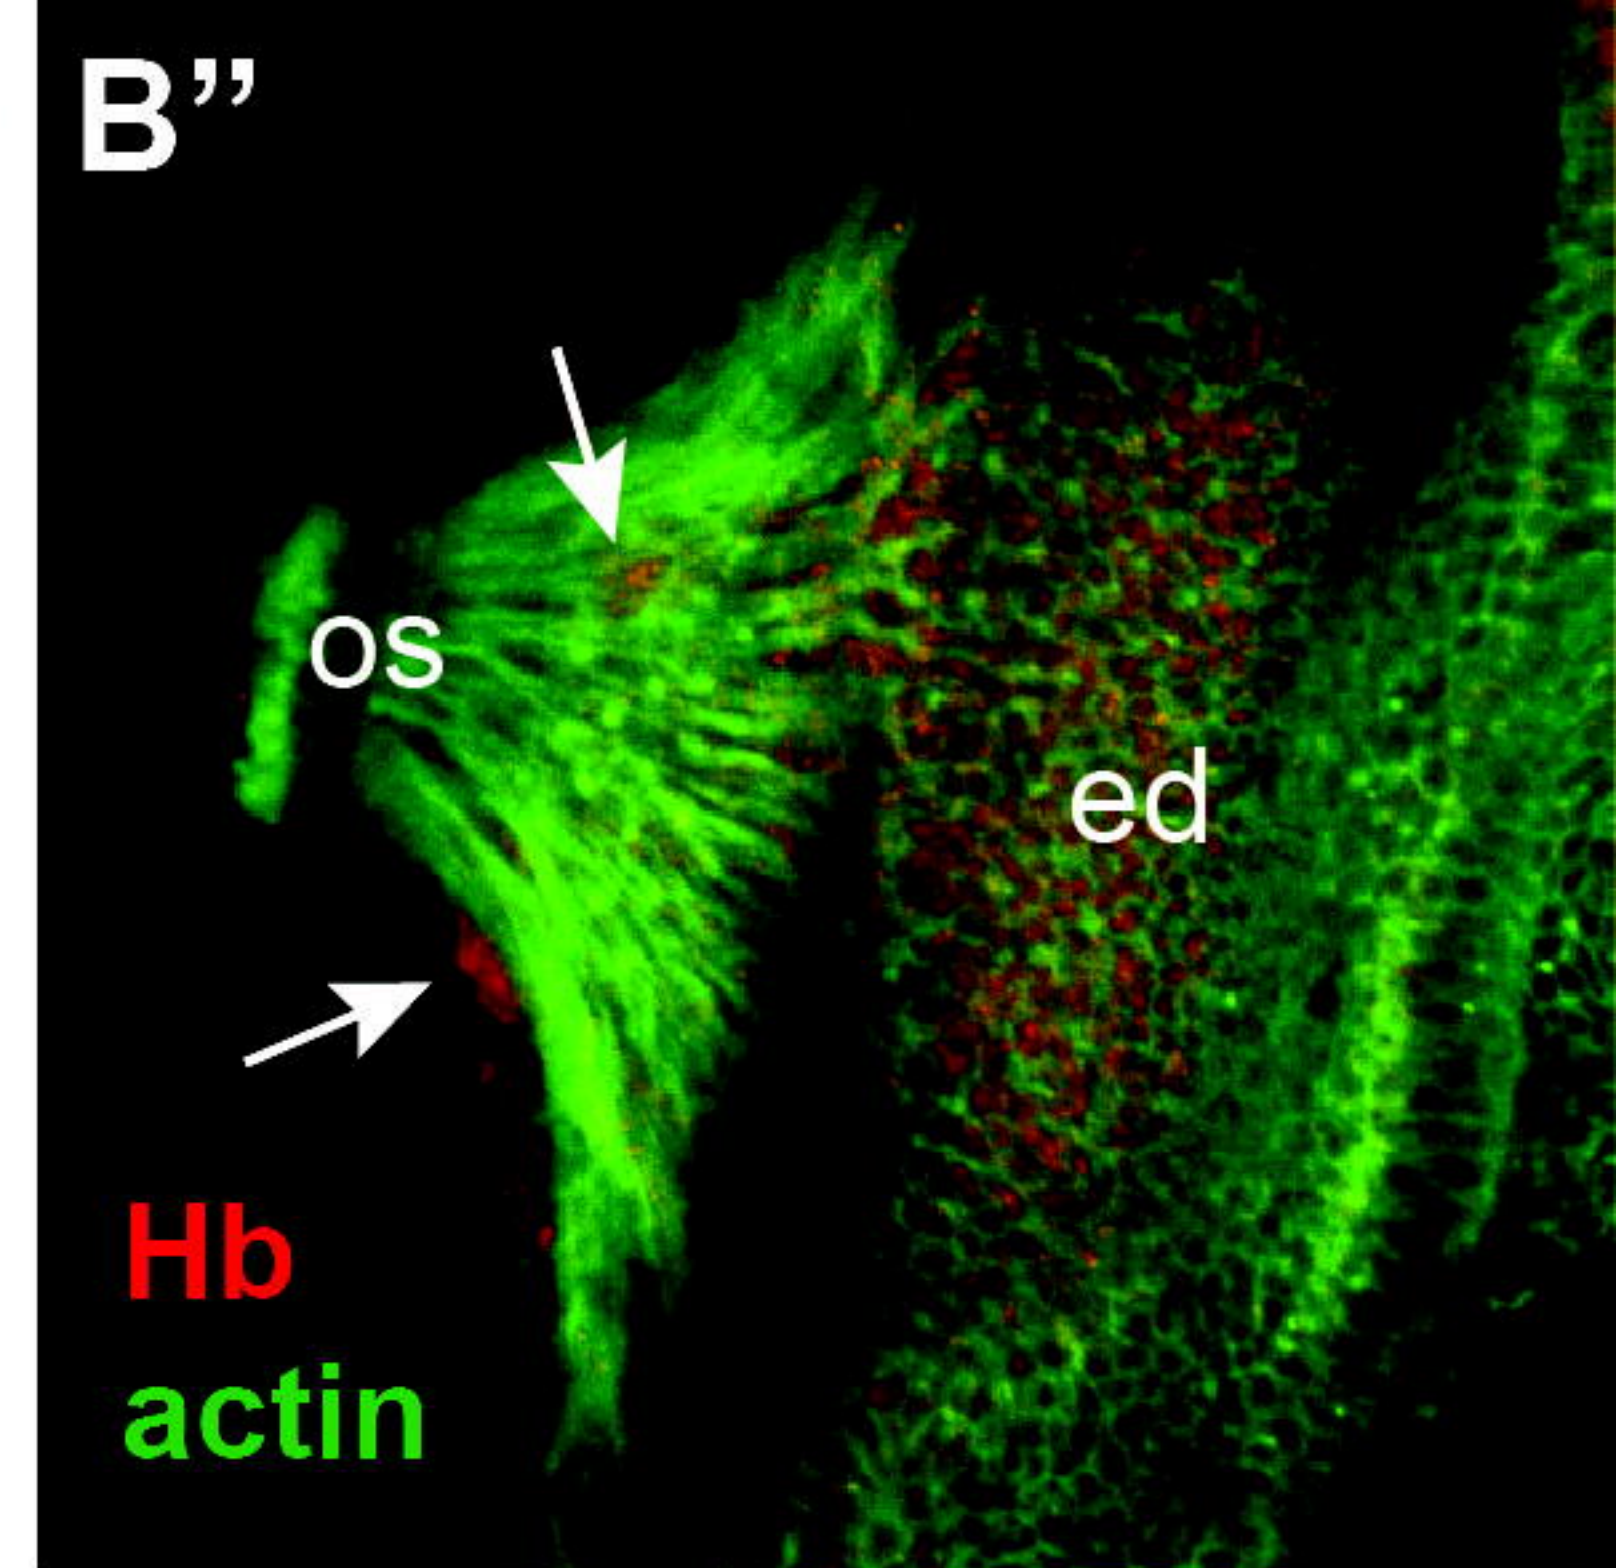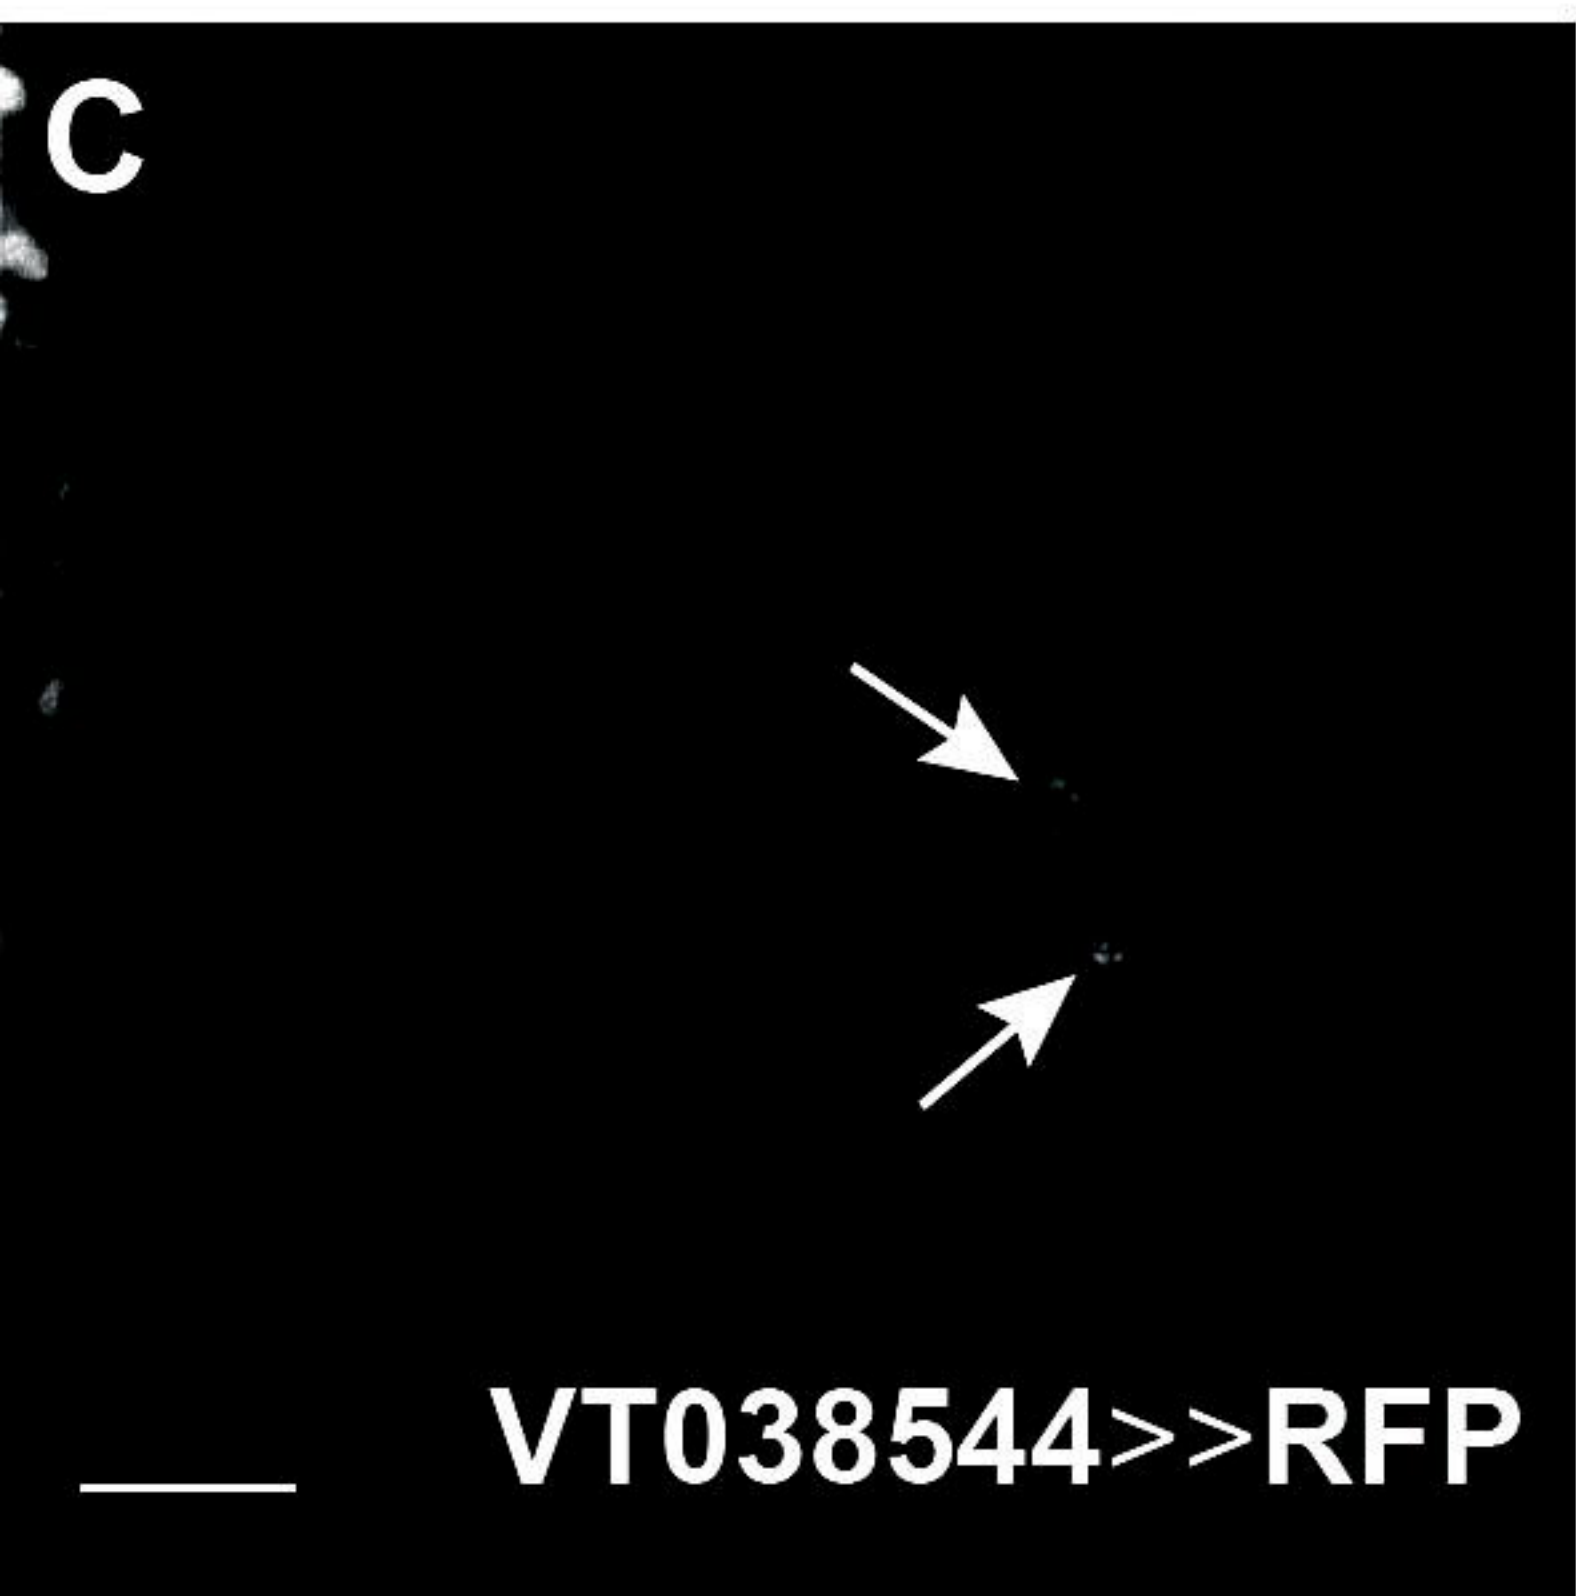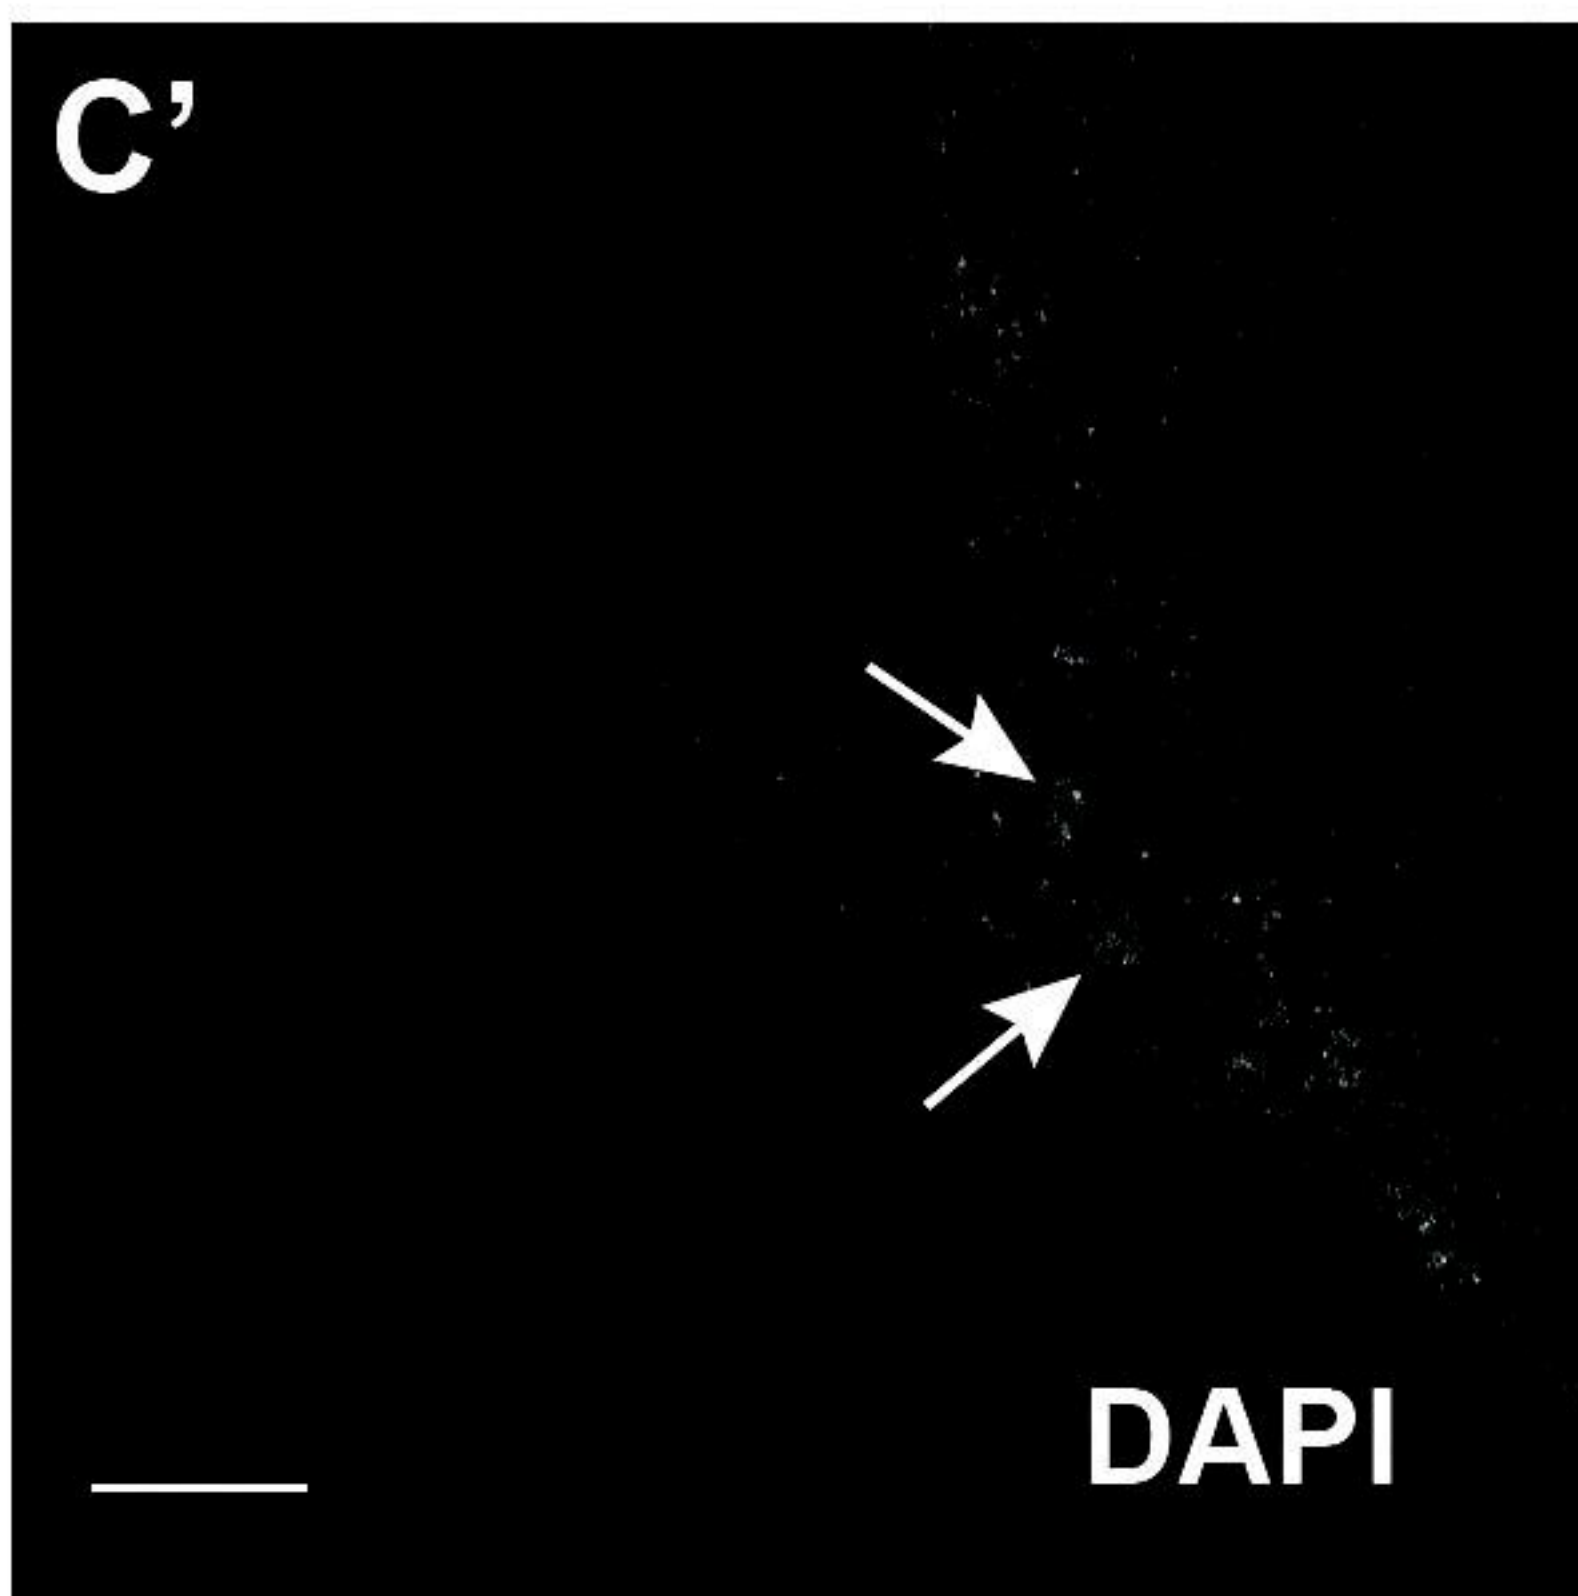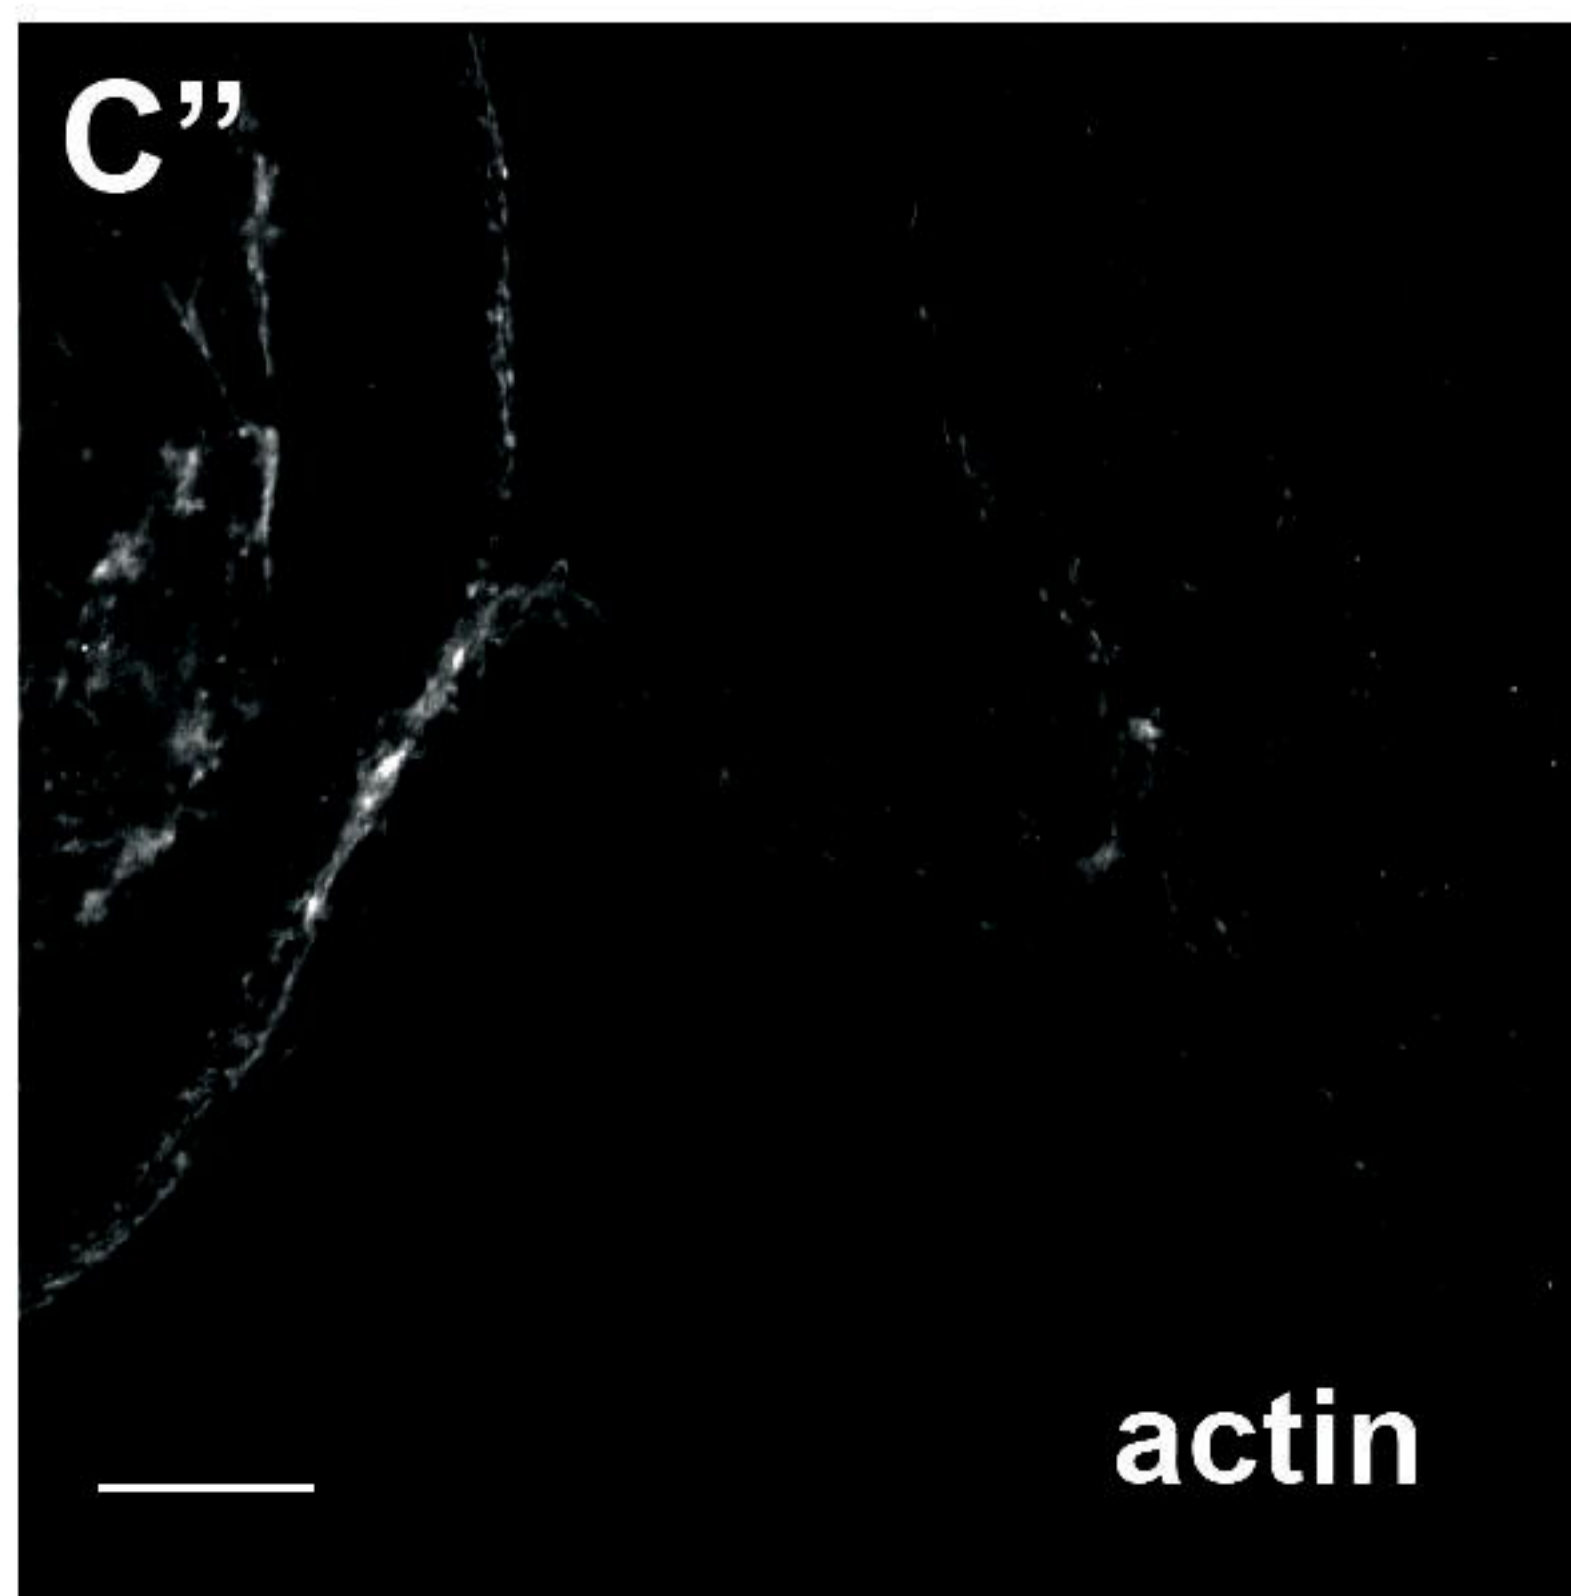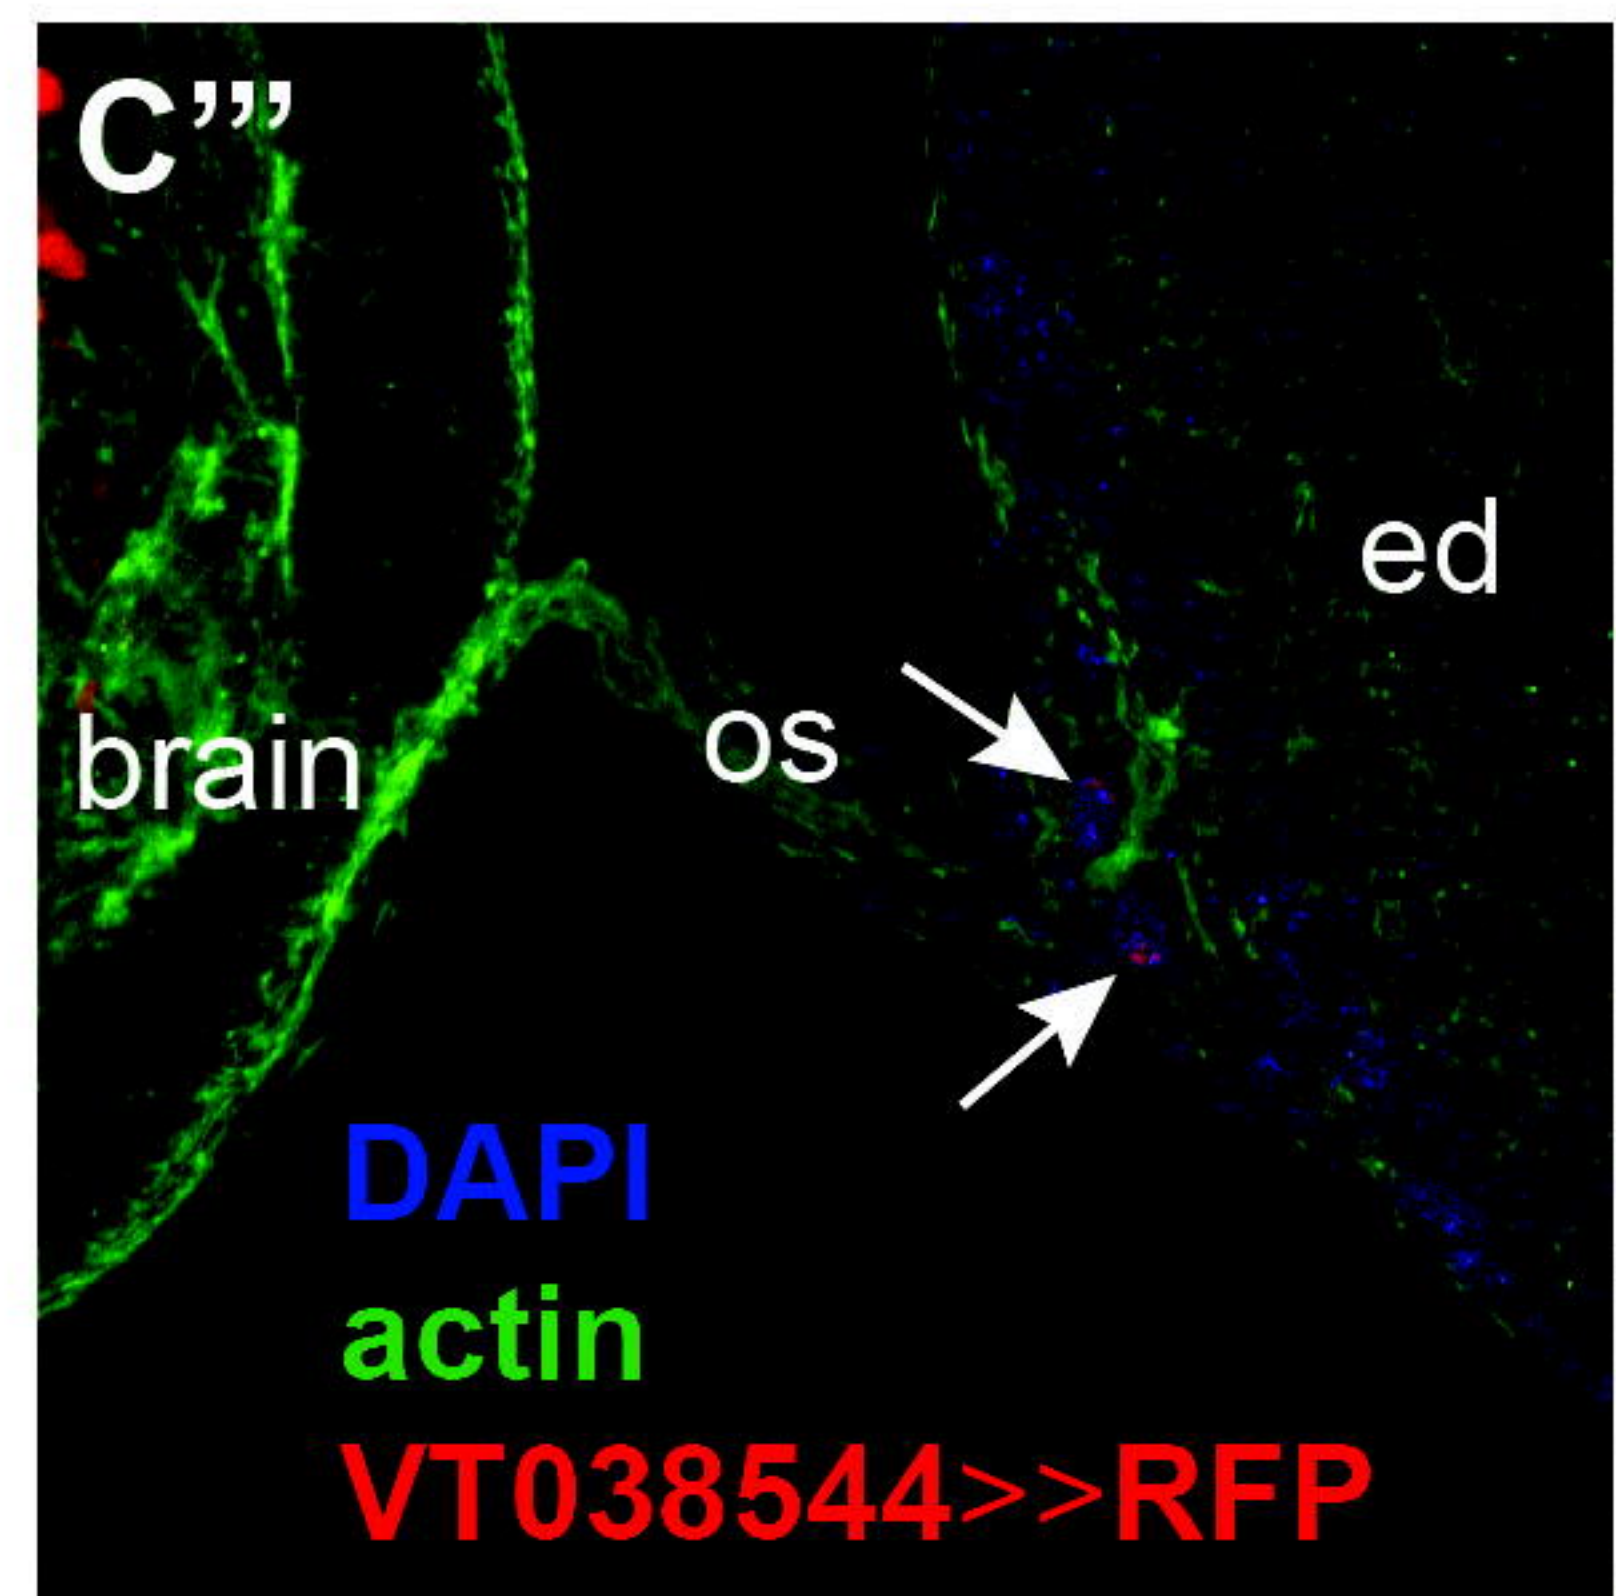



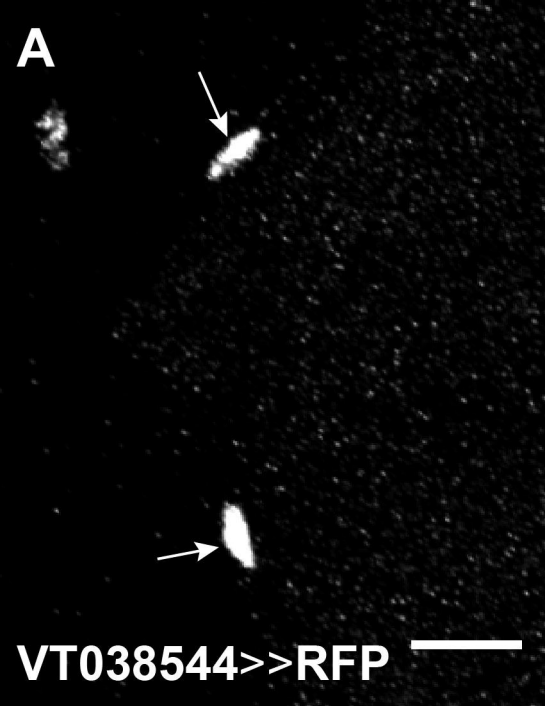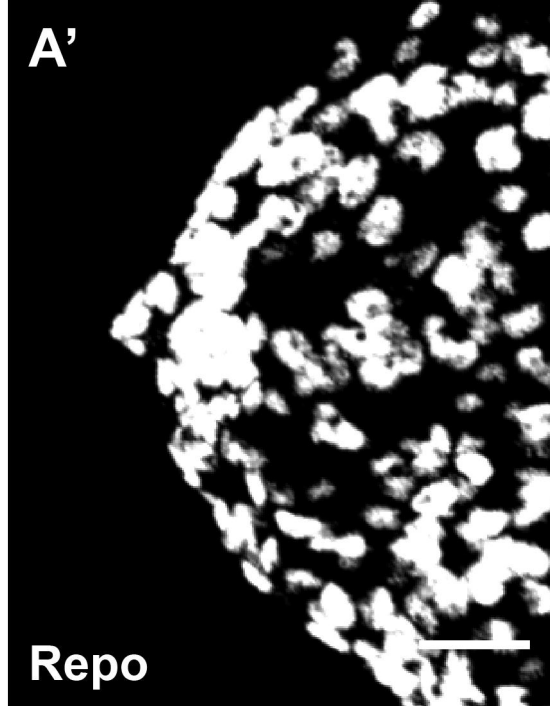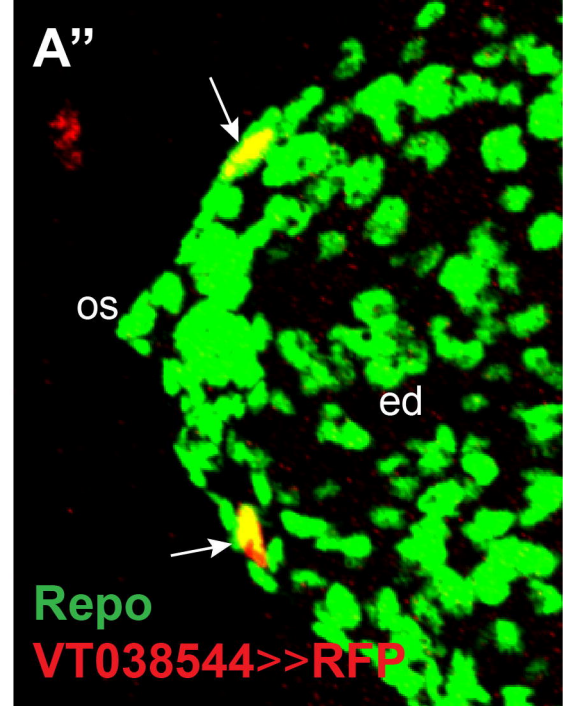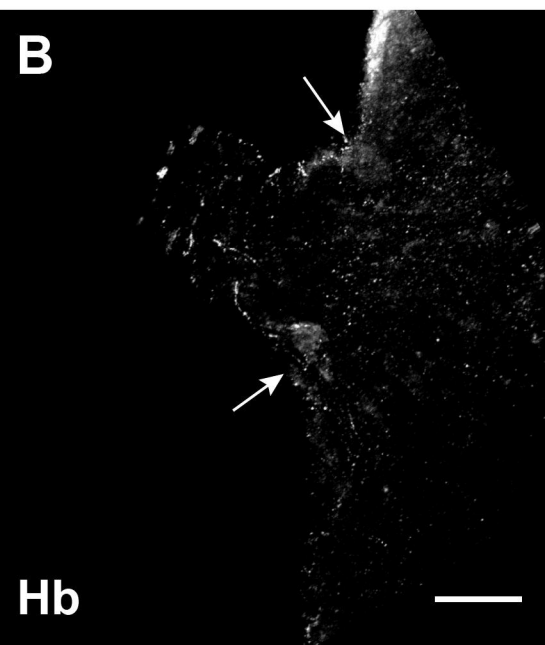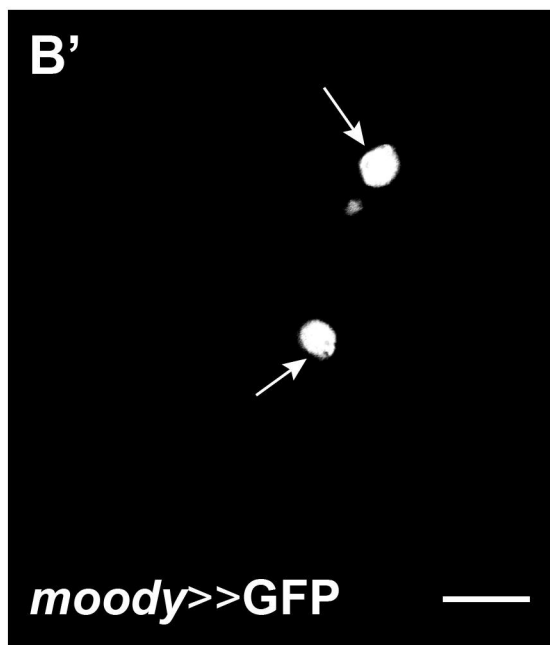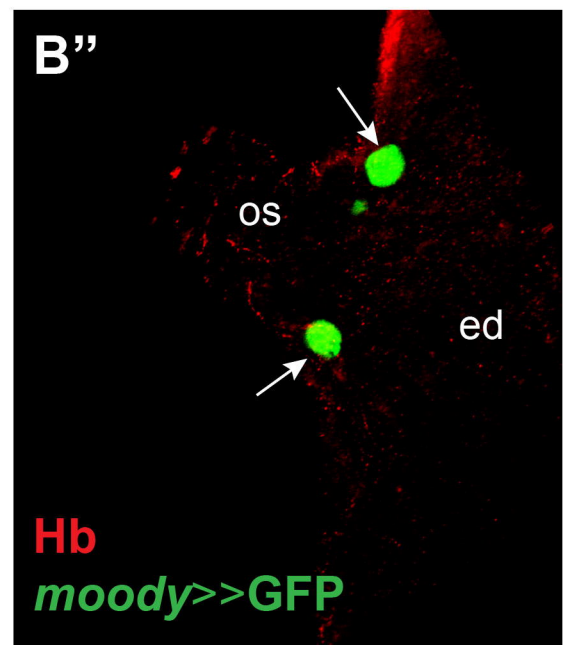



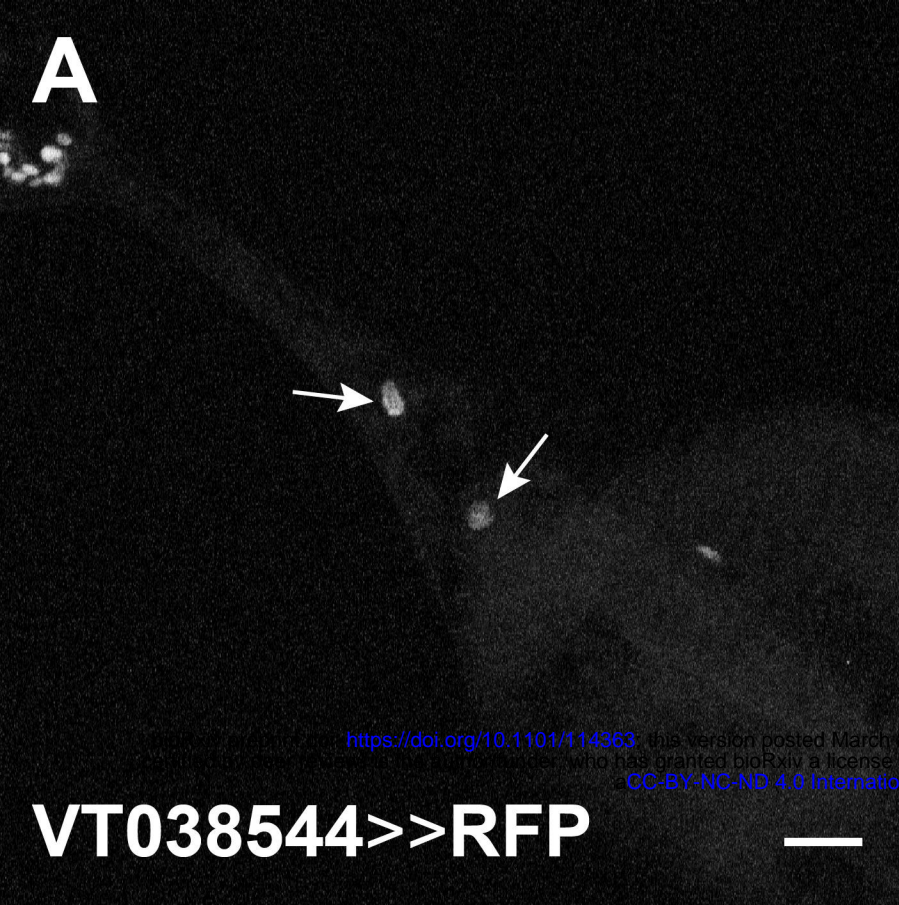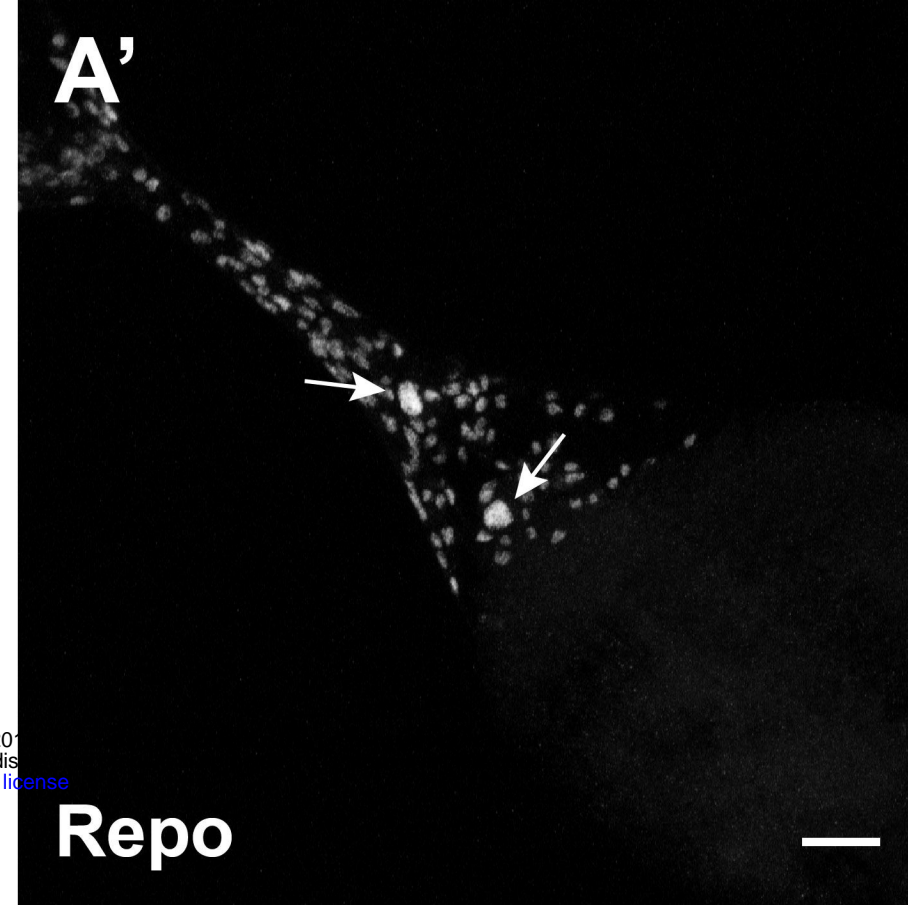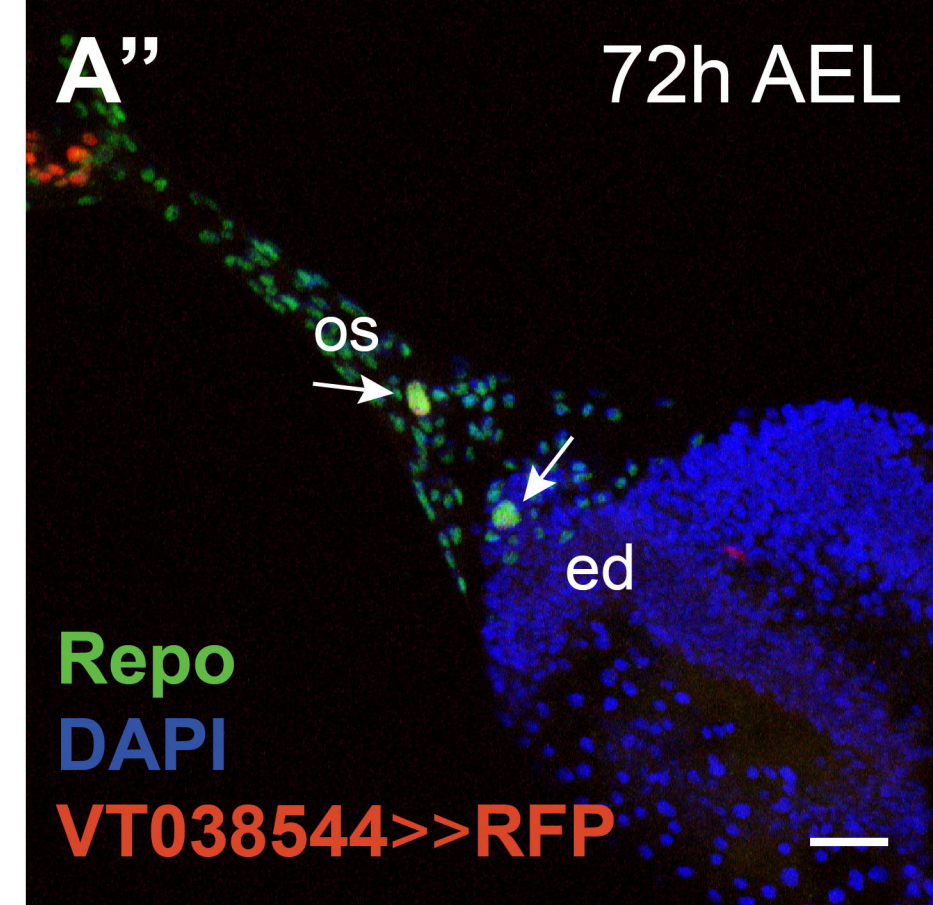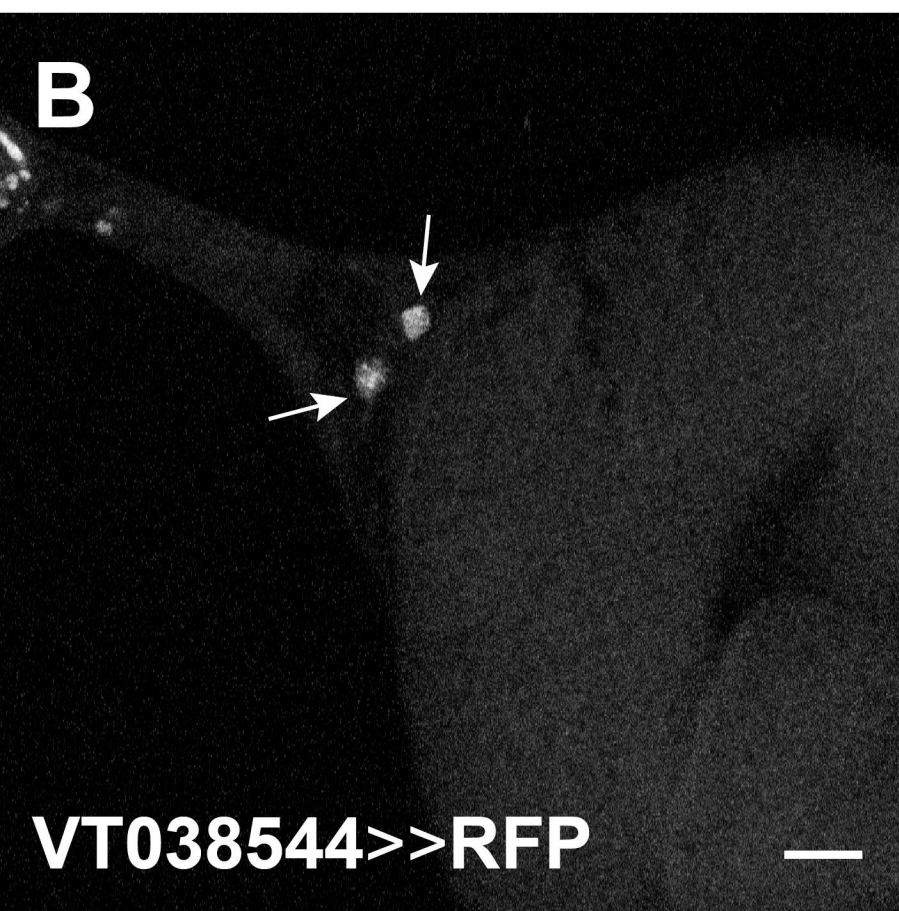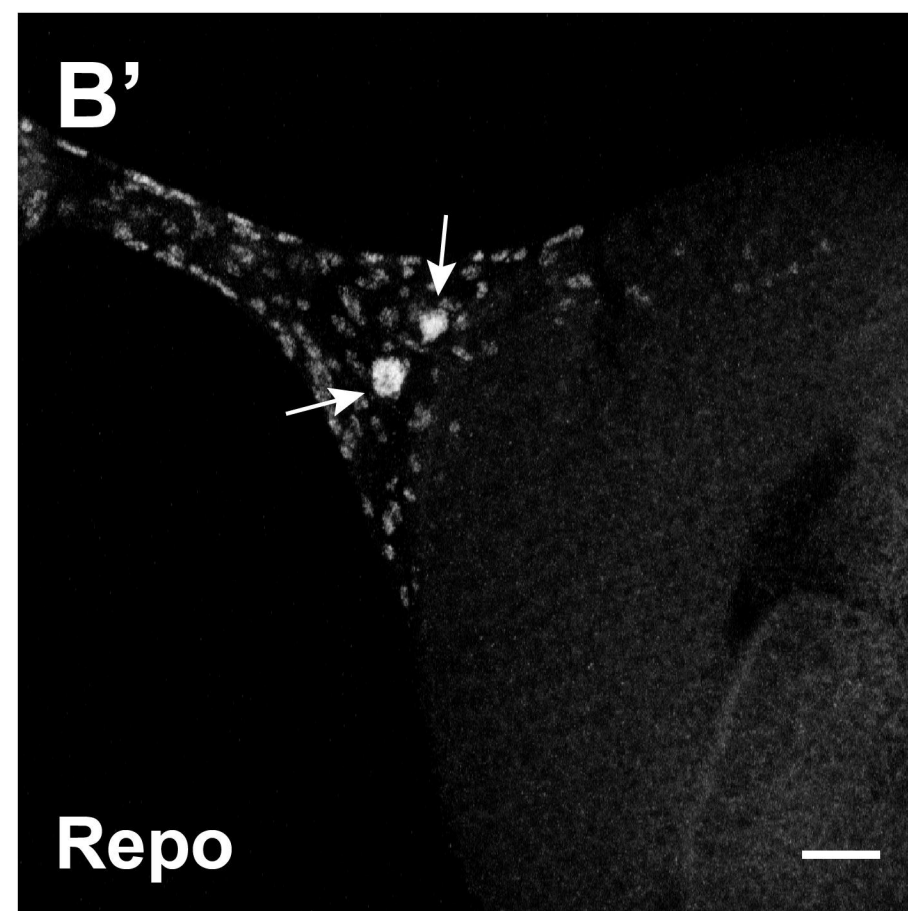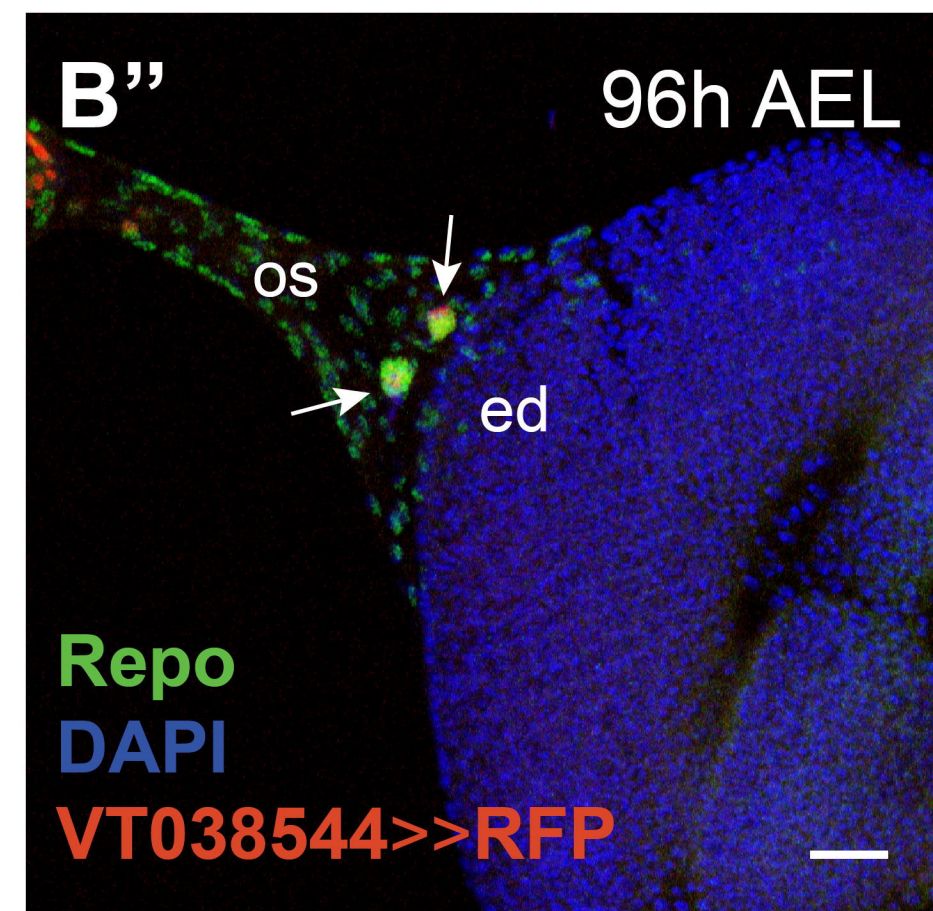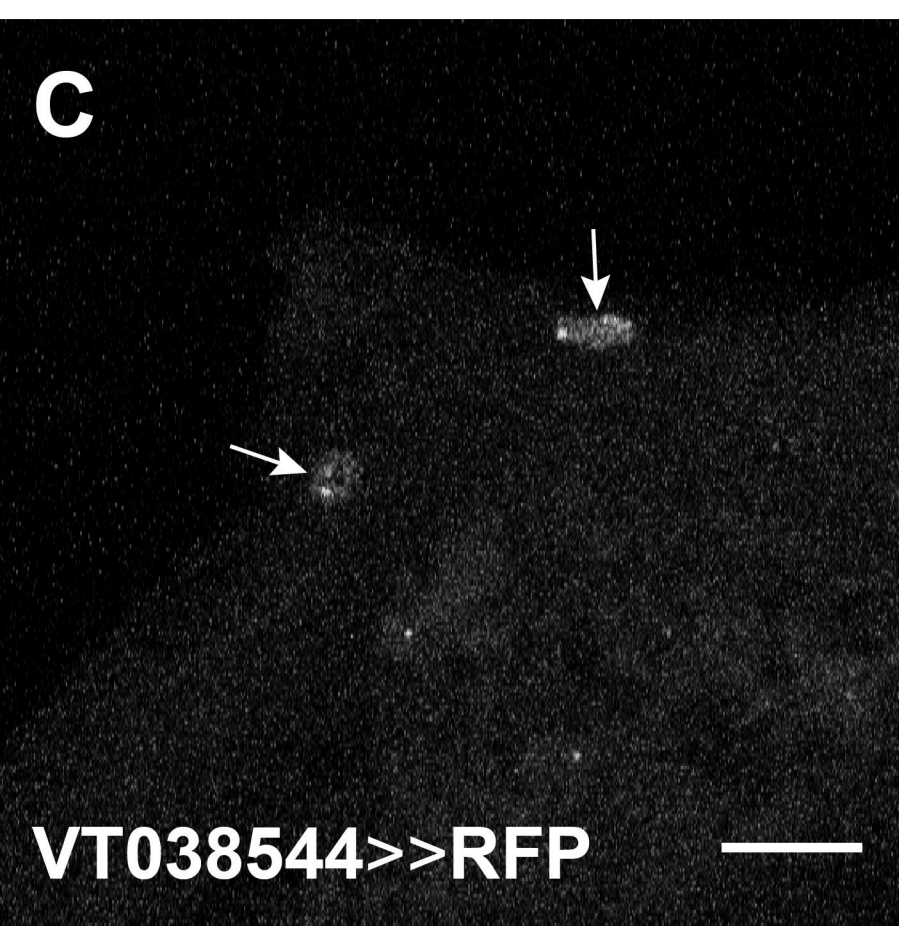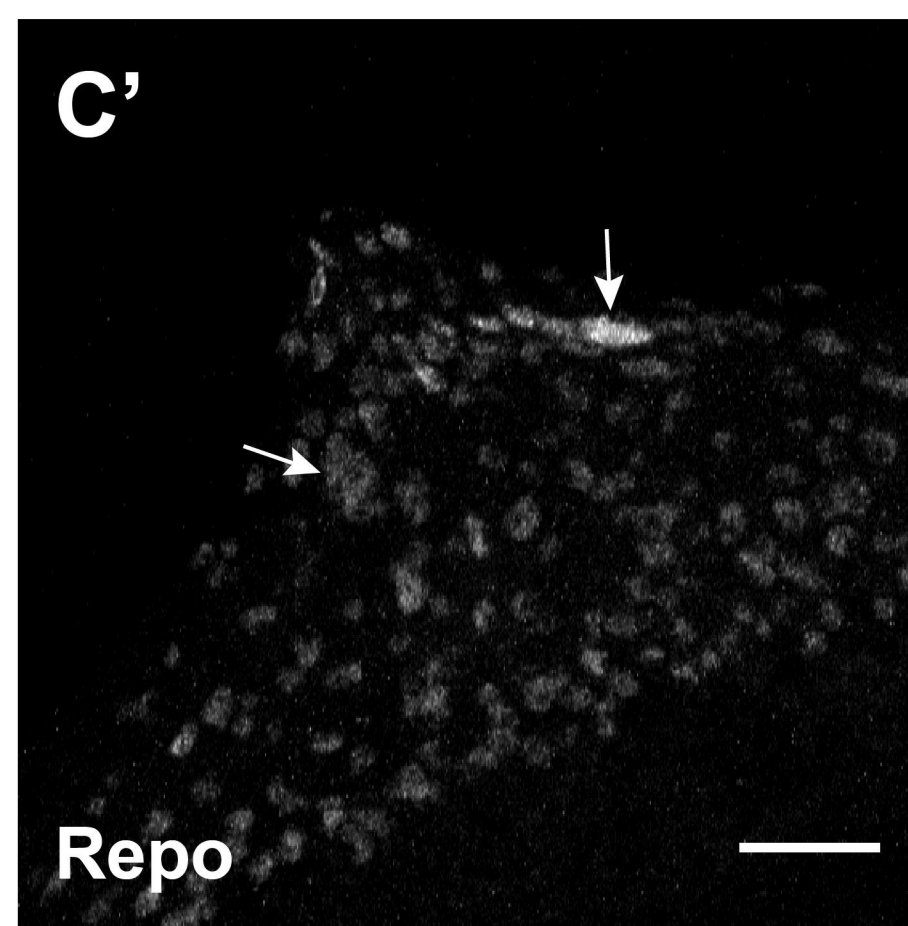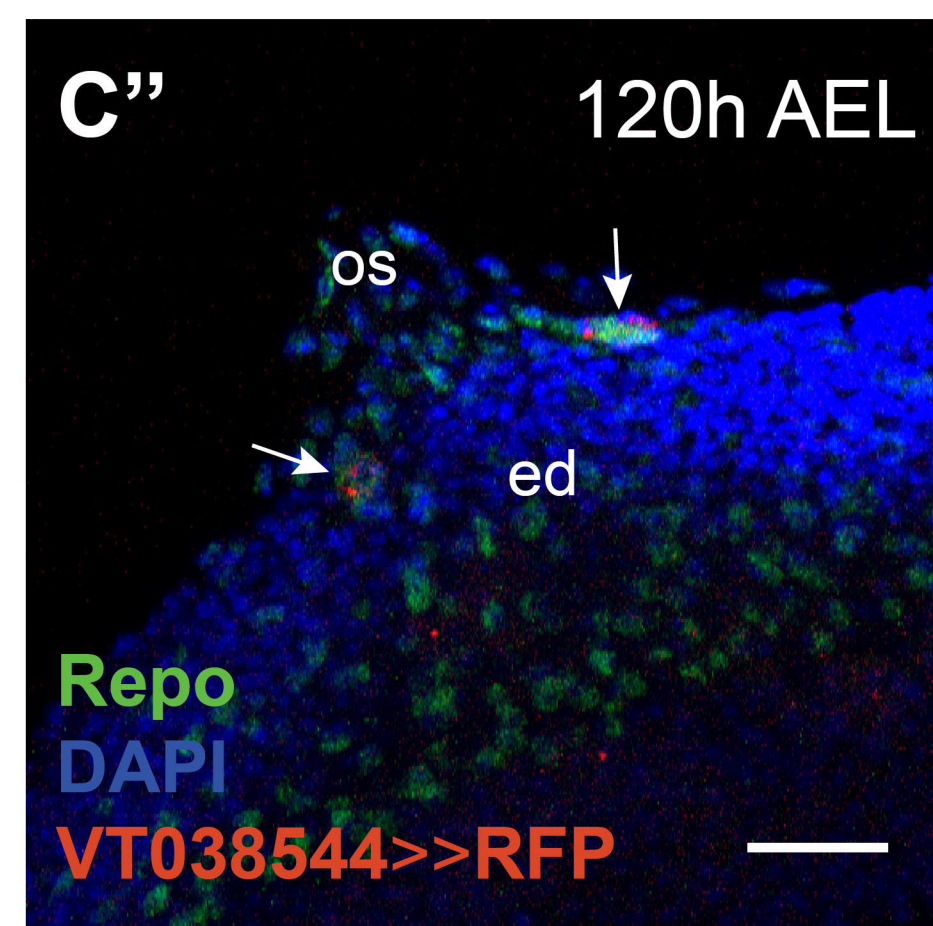



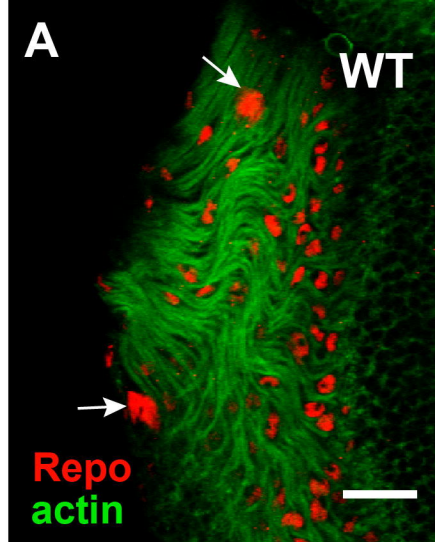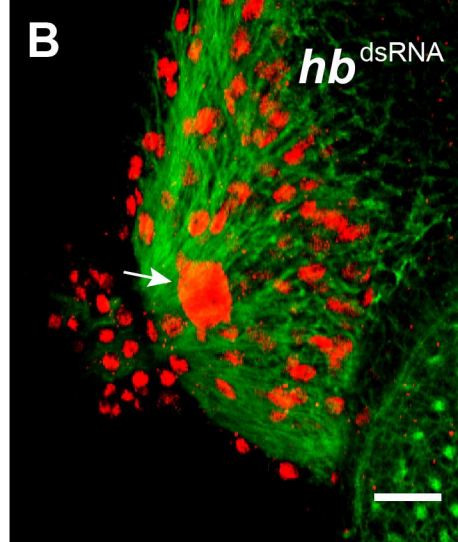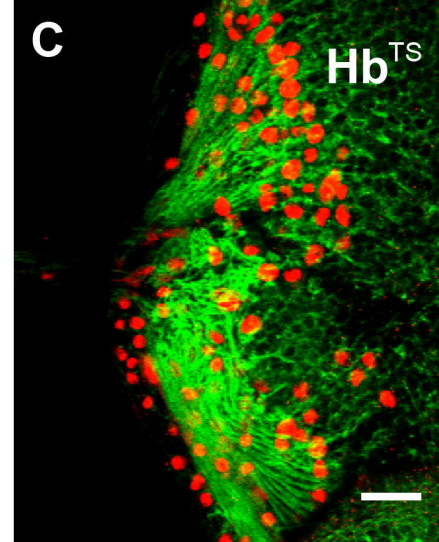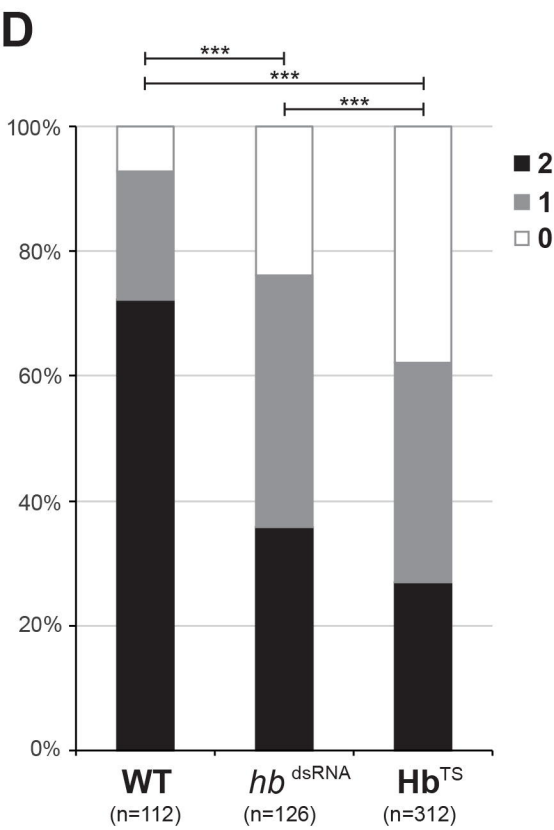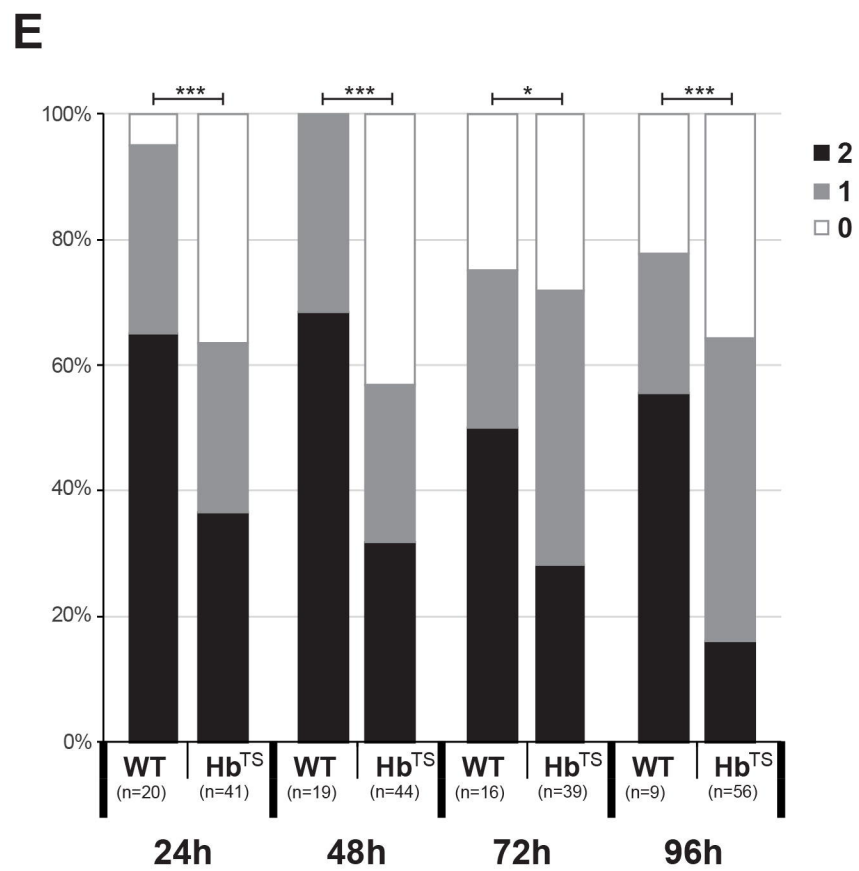



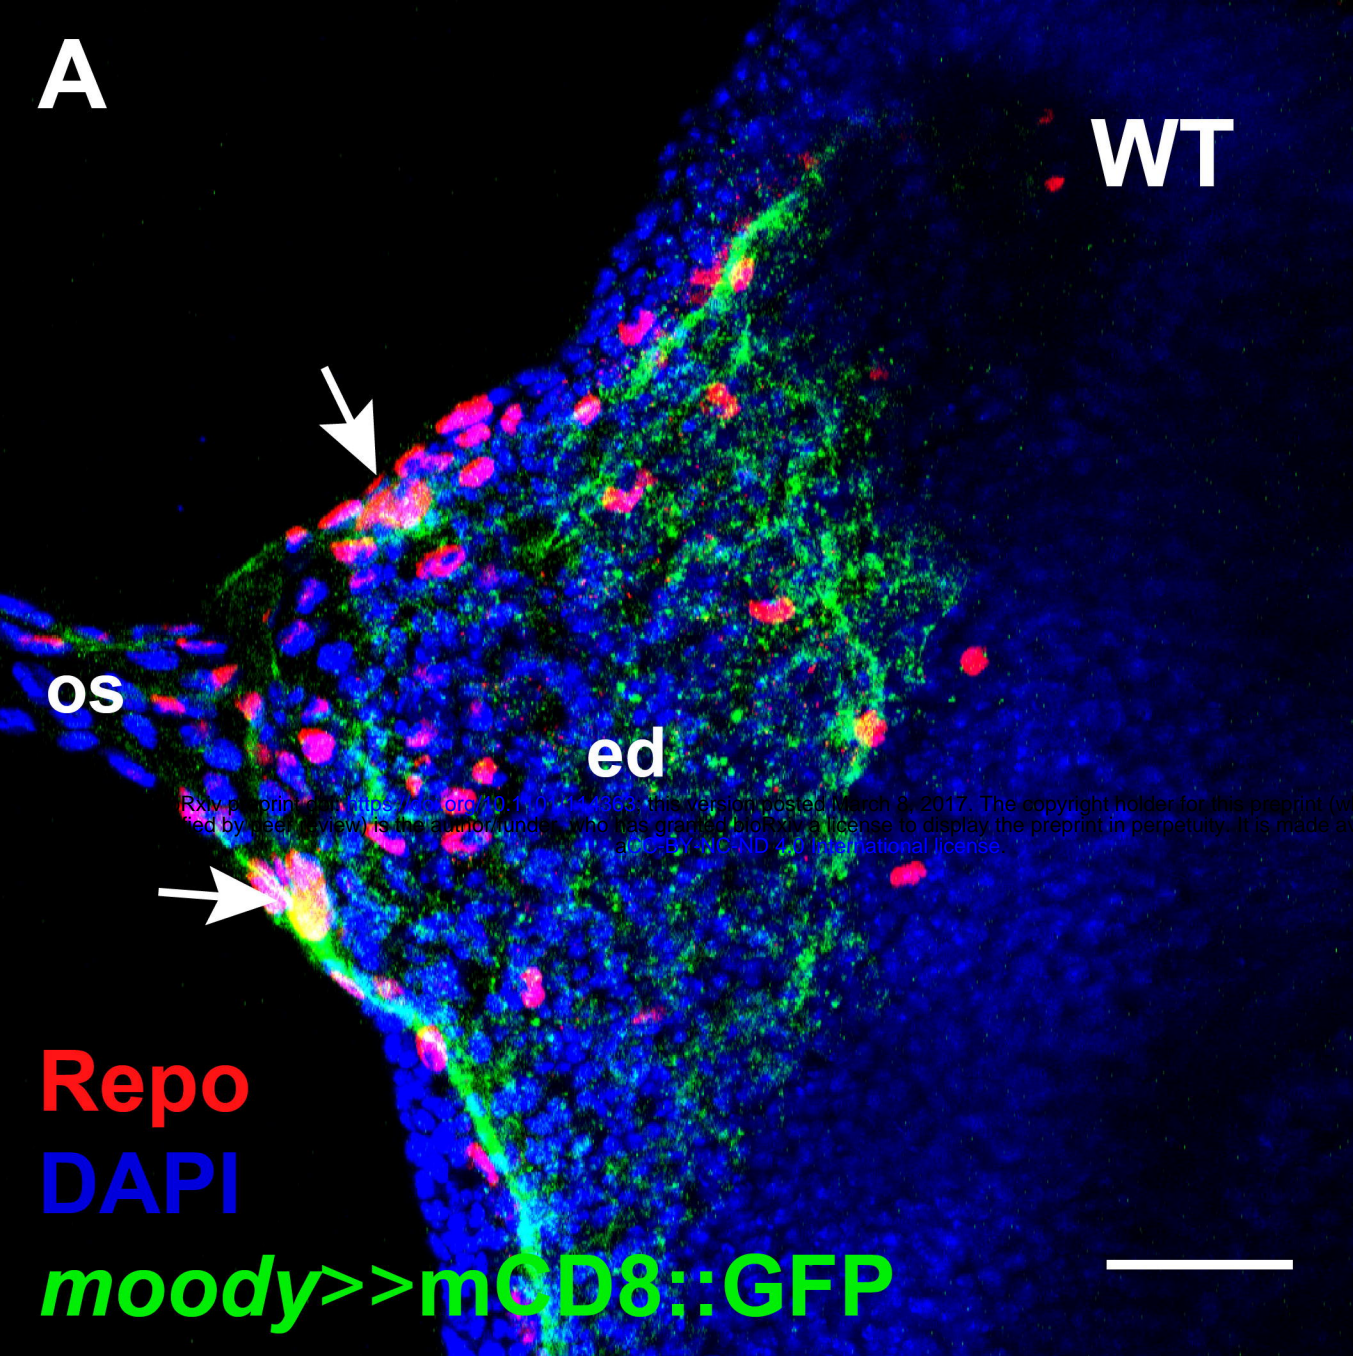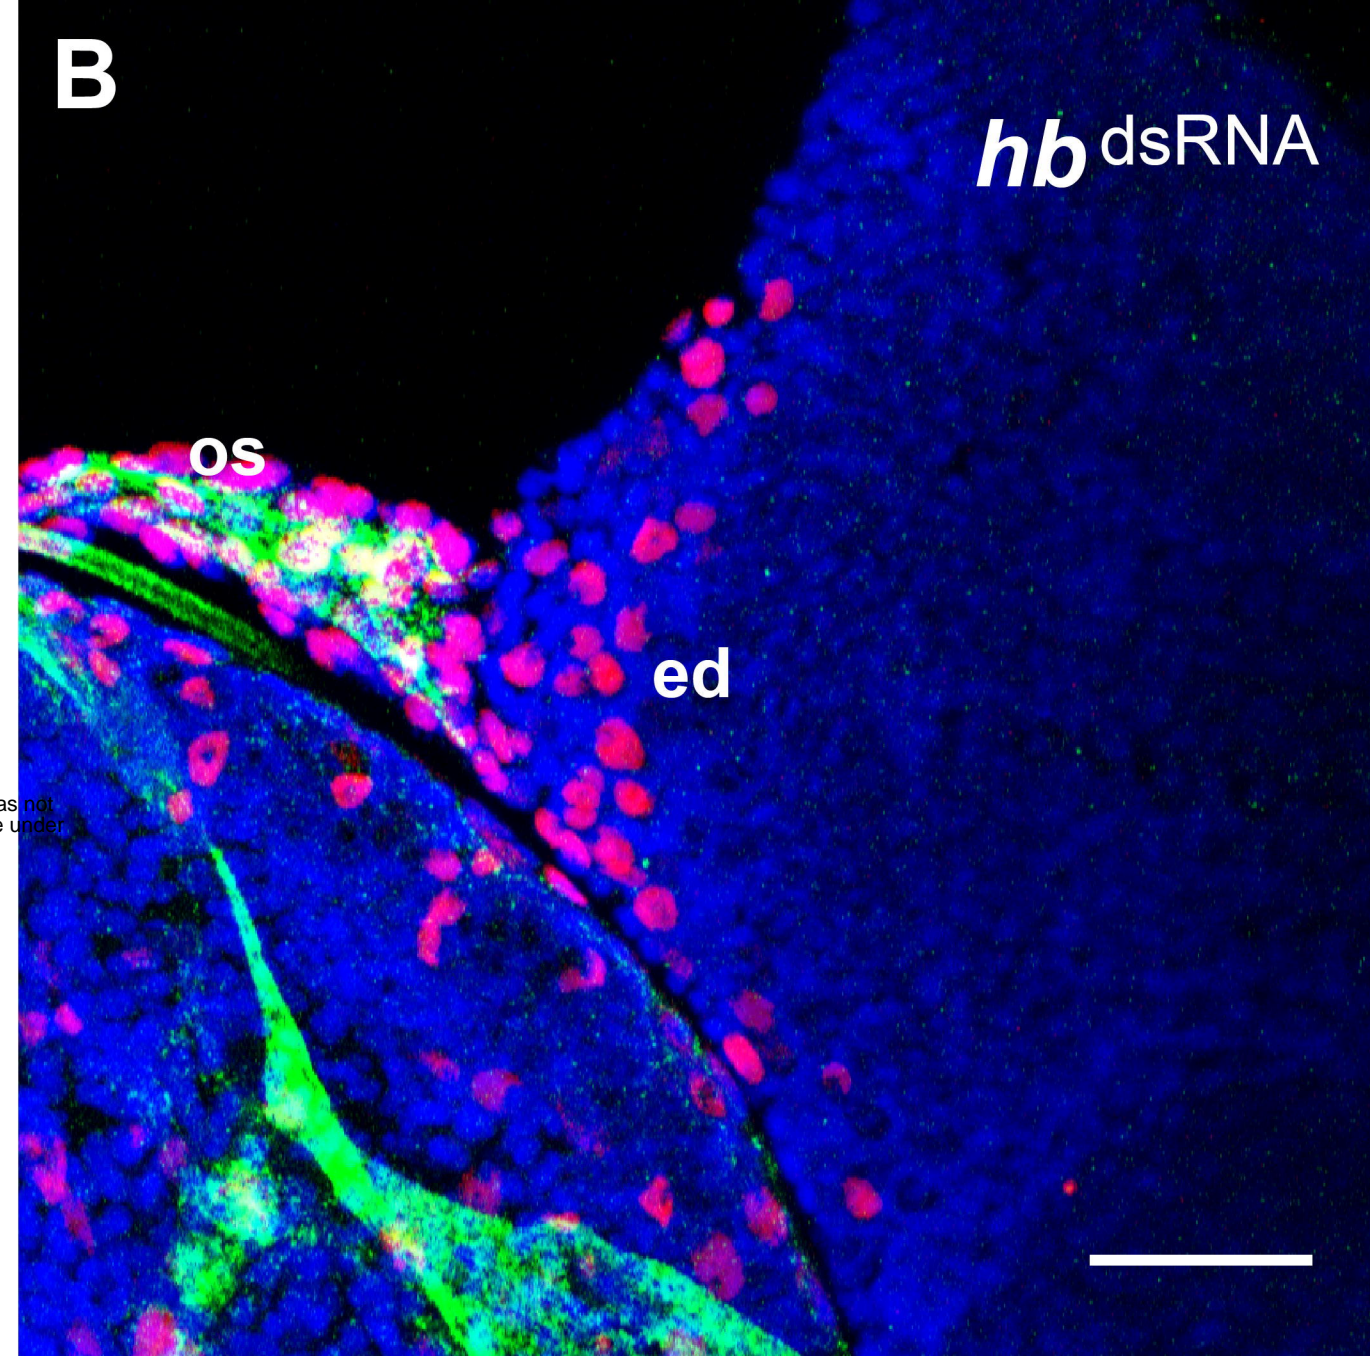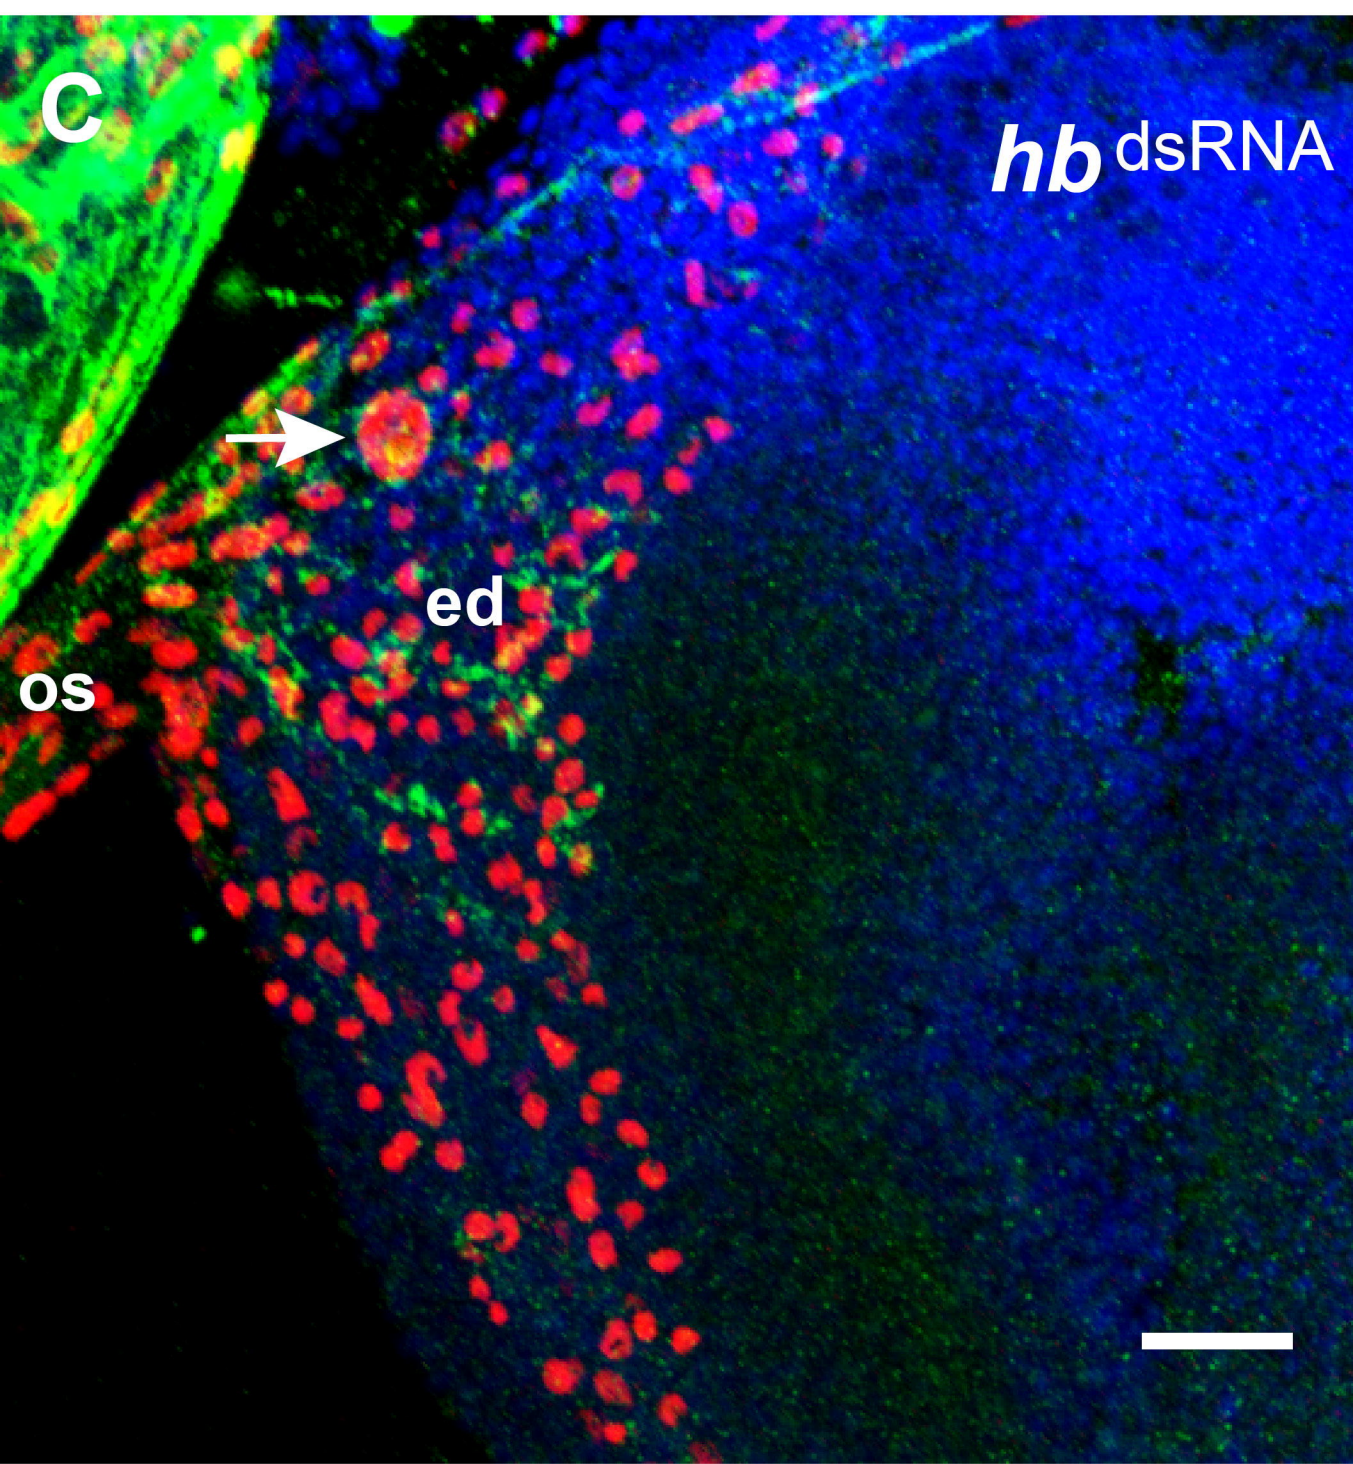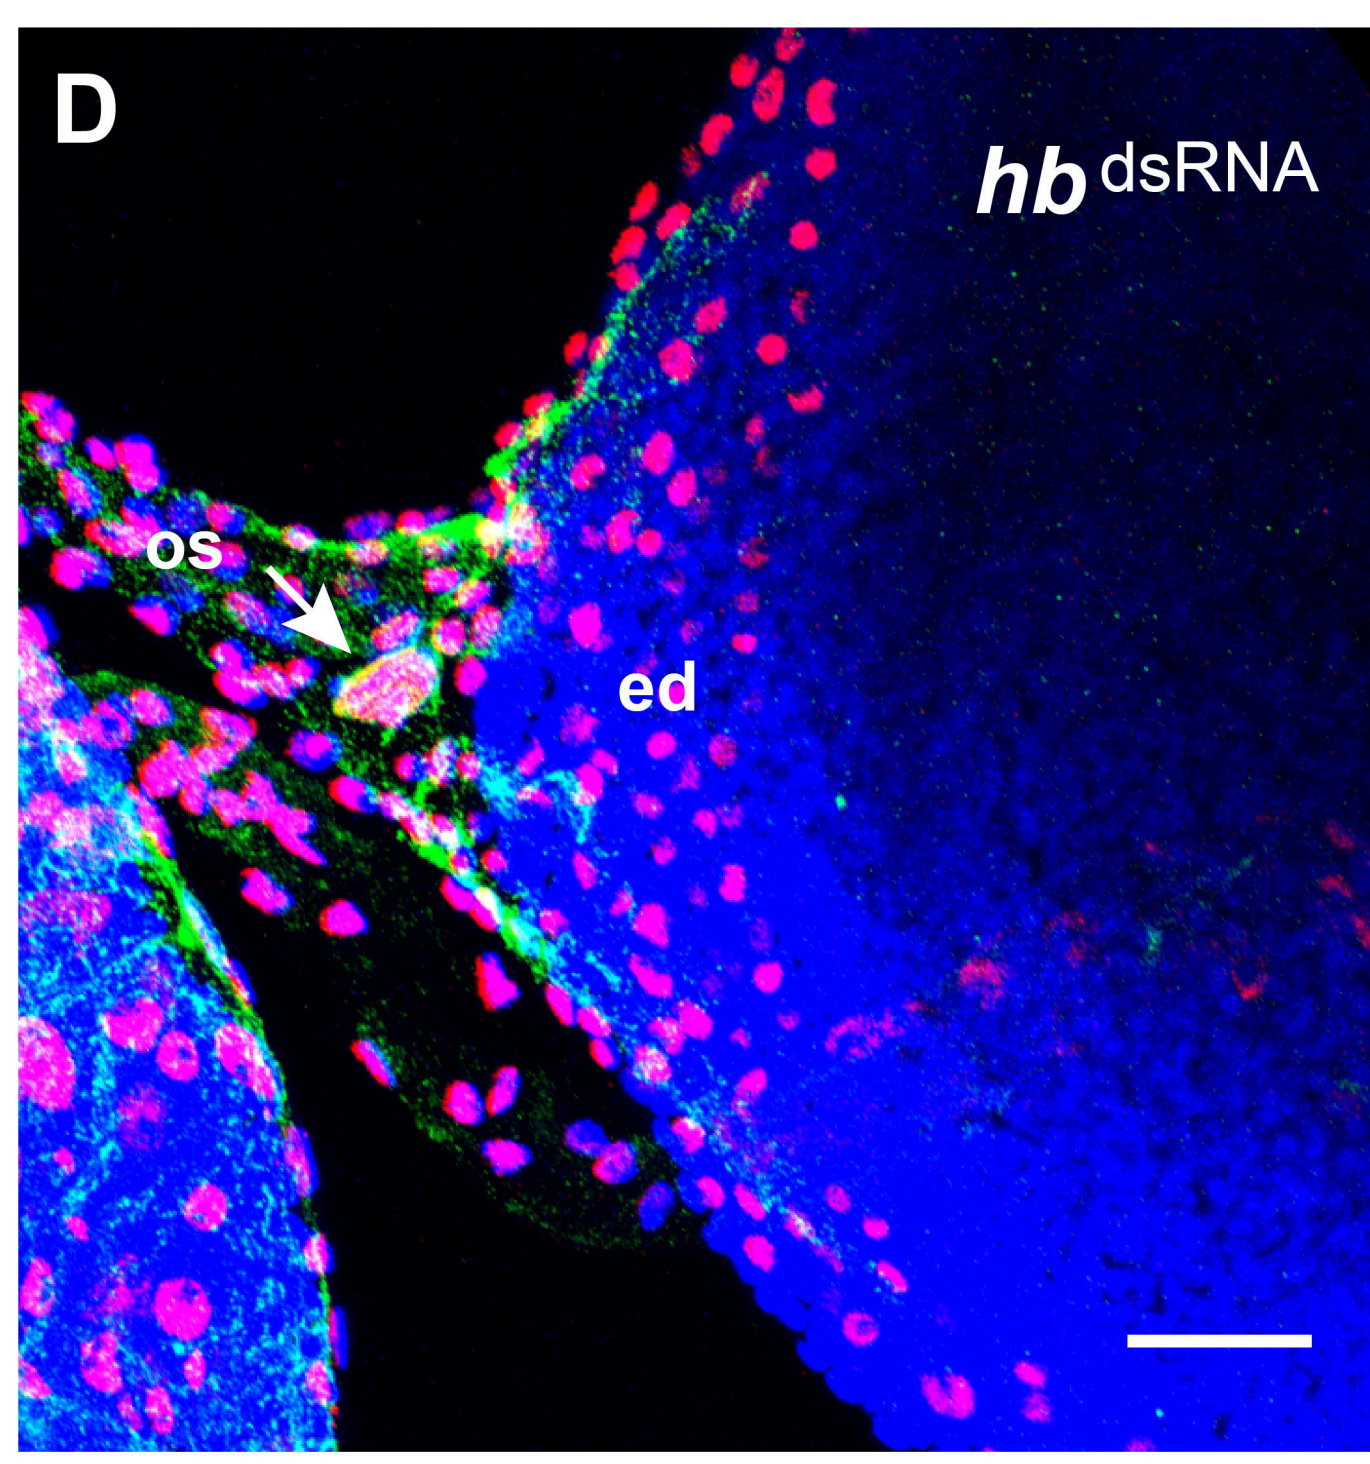



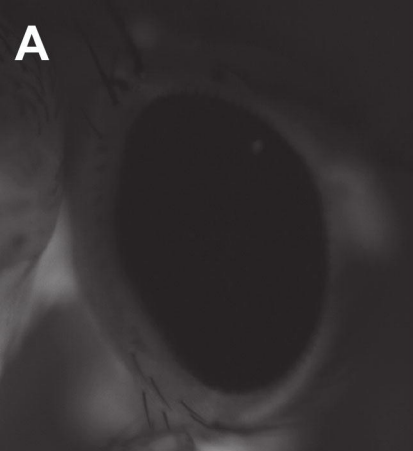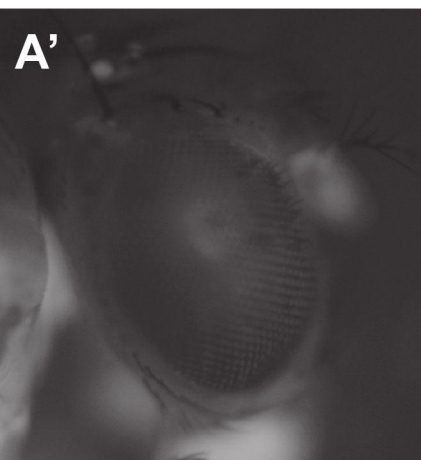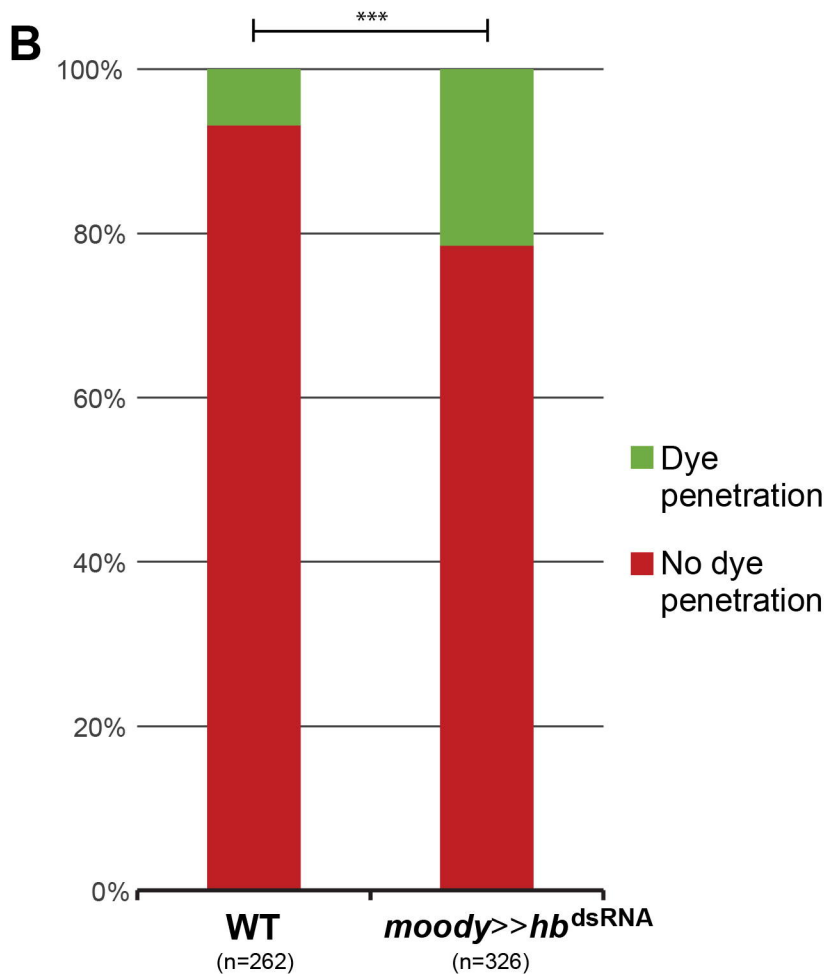



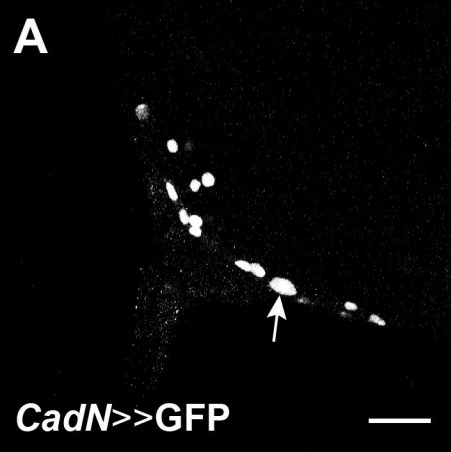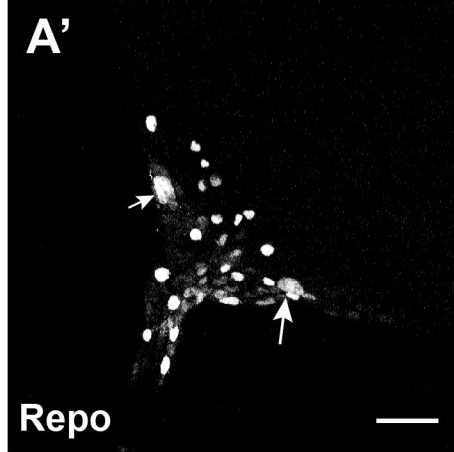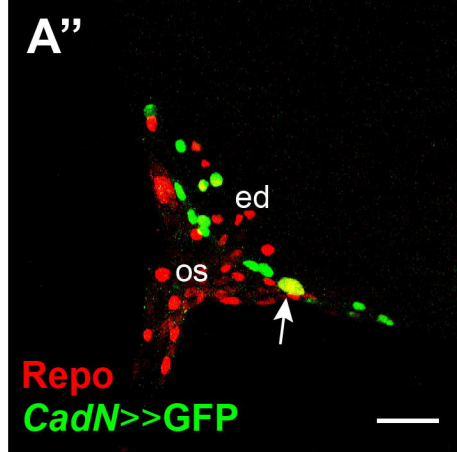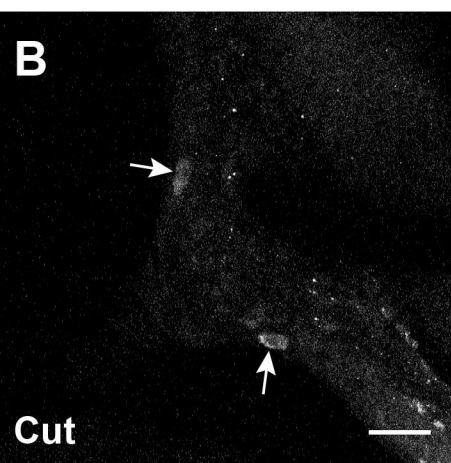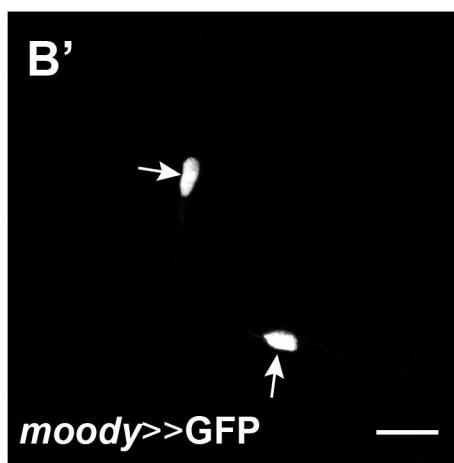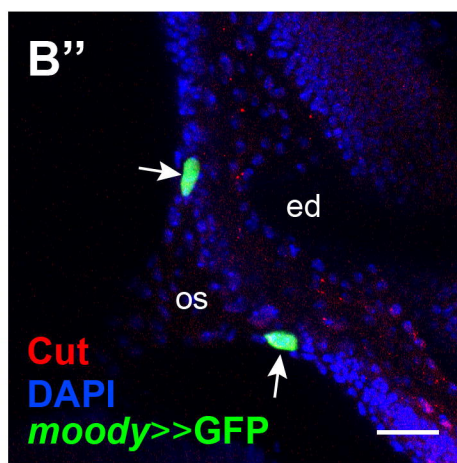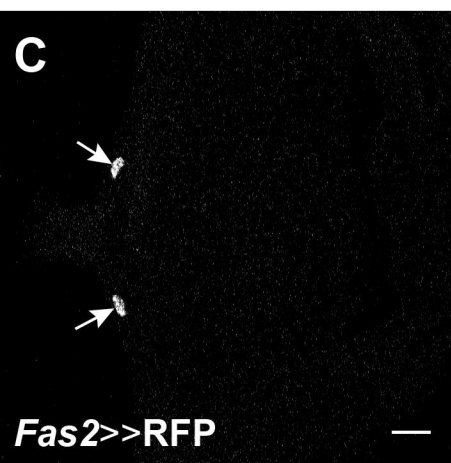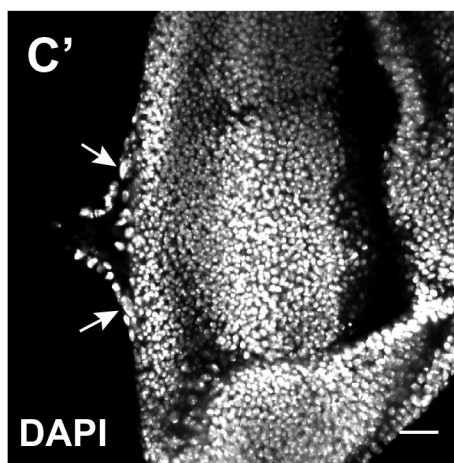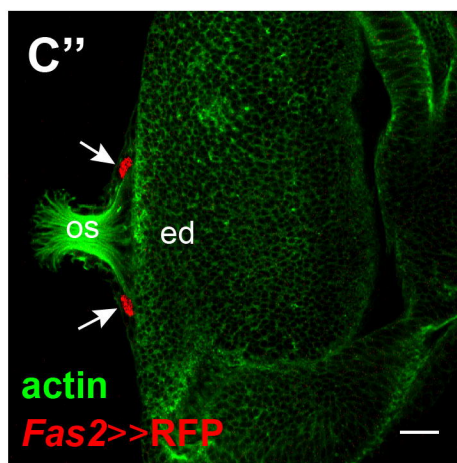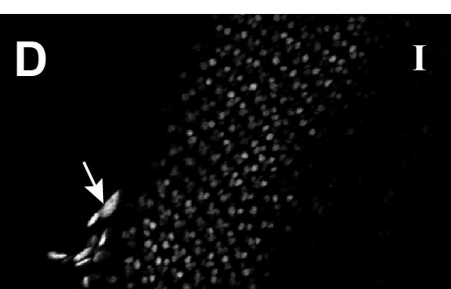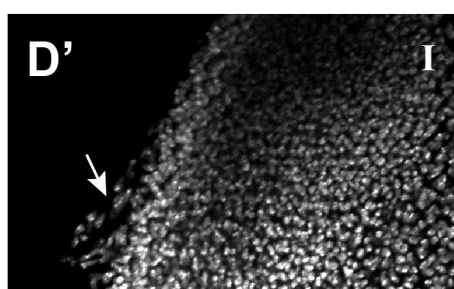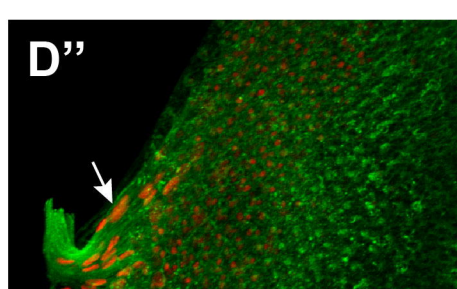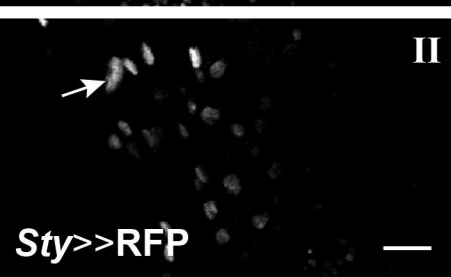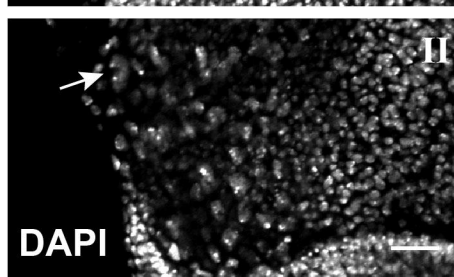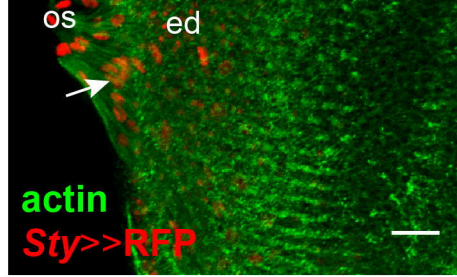

**A**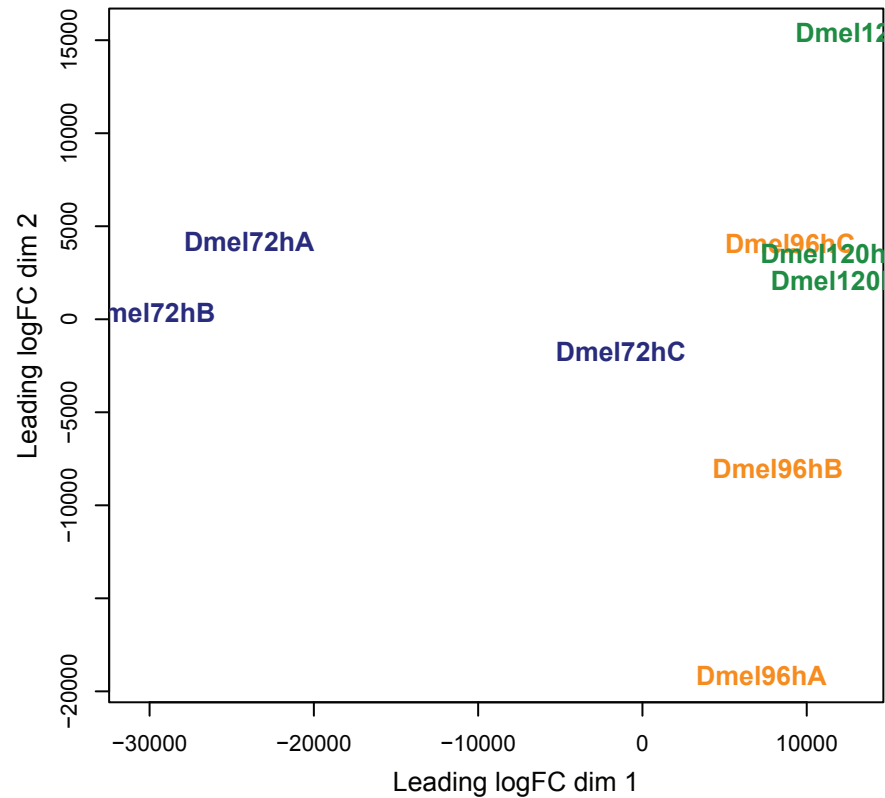**B**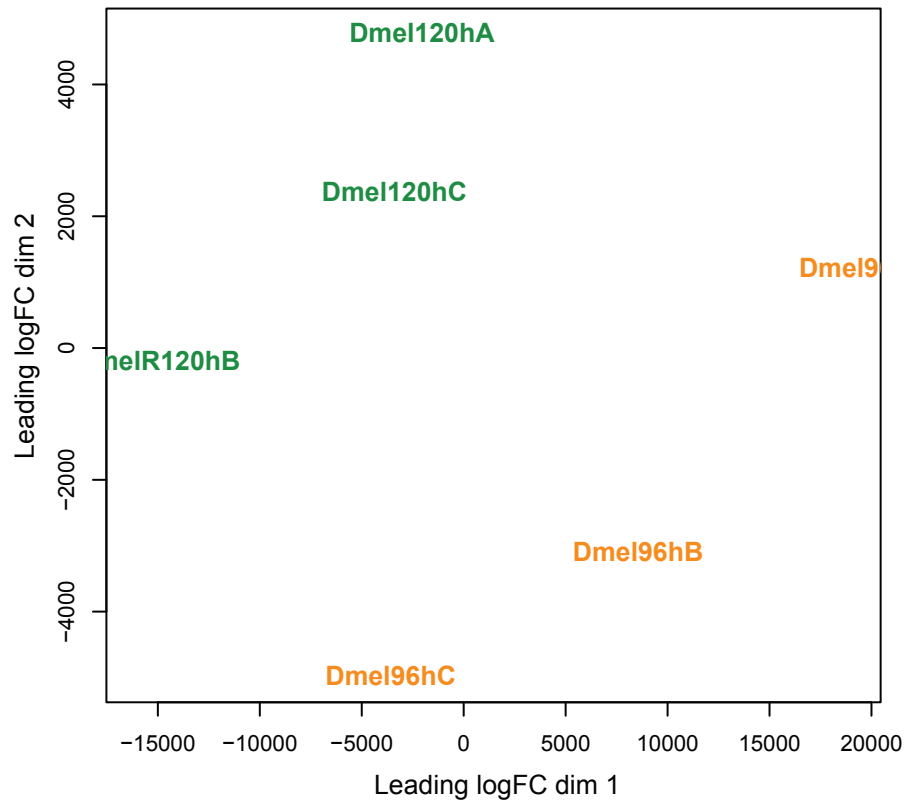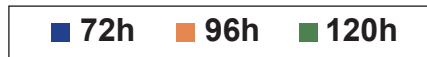





antenna  
disc

*Mef2*>>RFP

DAPI

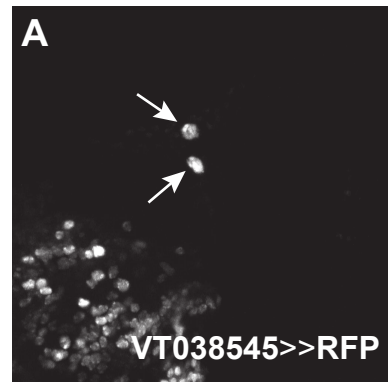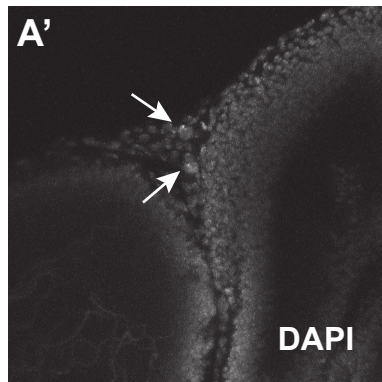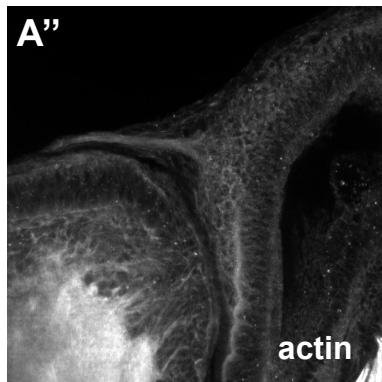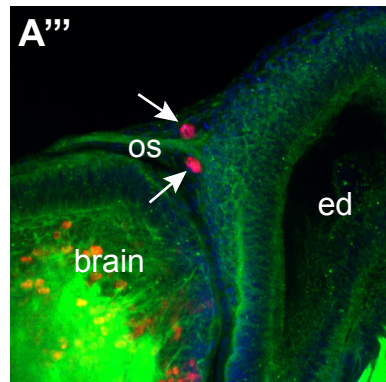

DAPI  
actin  
VT038544>>RFP

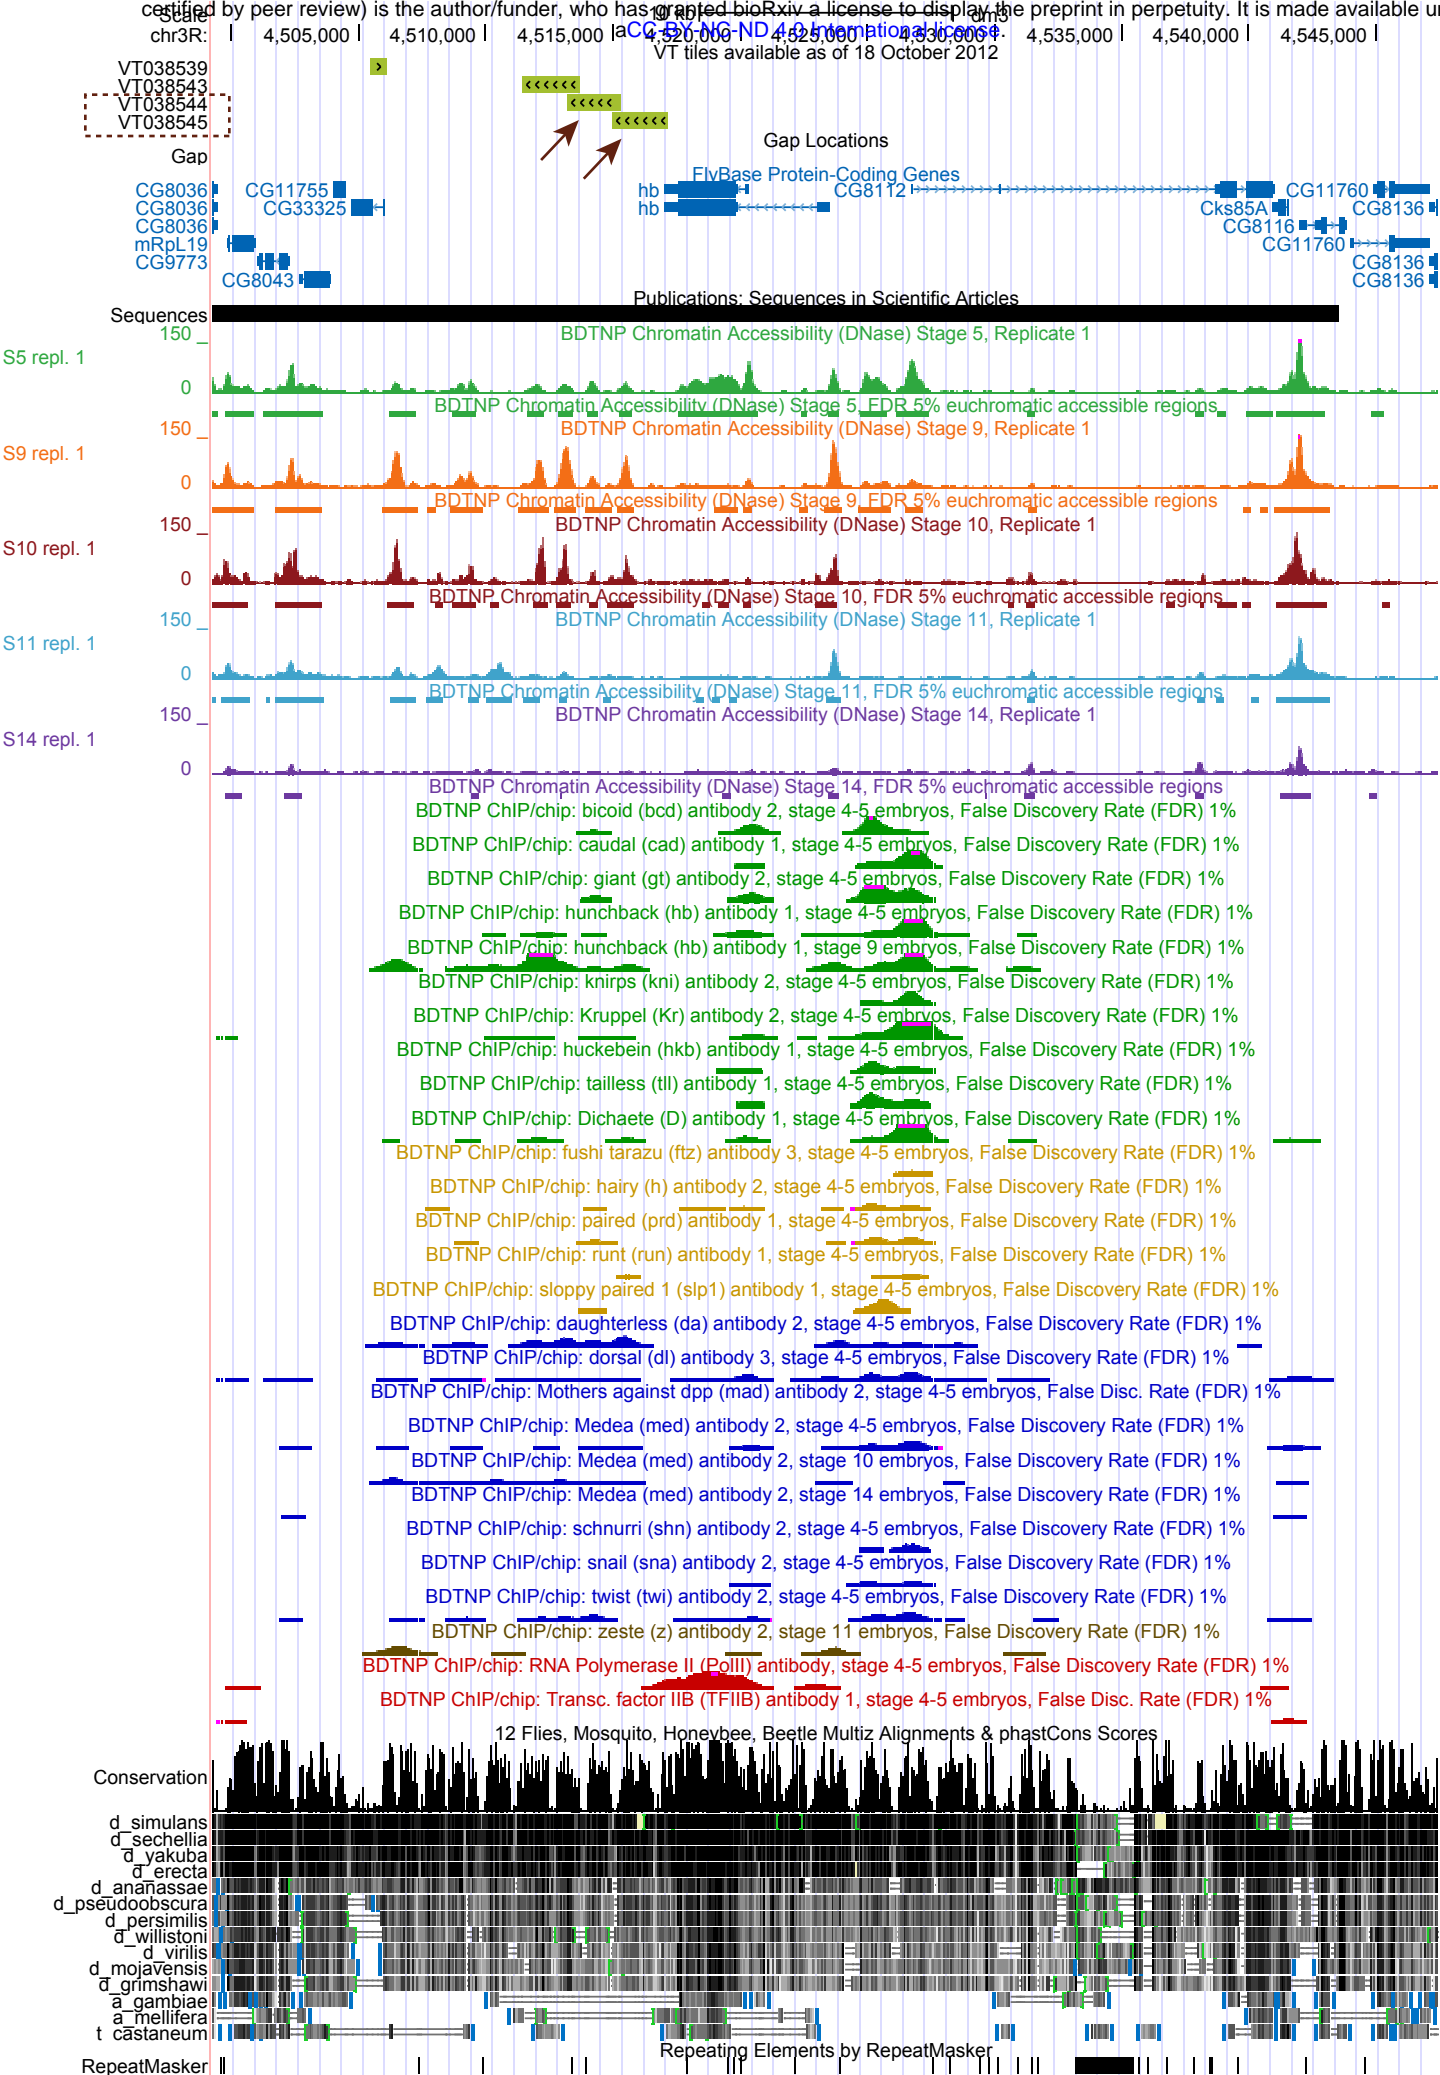

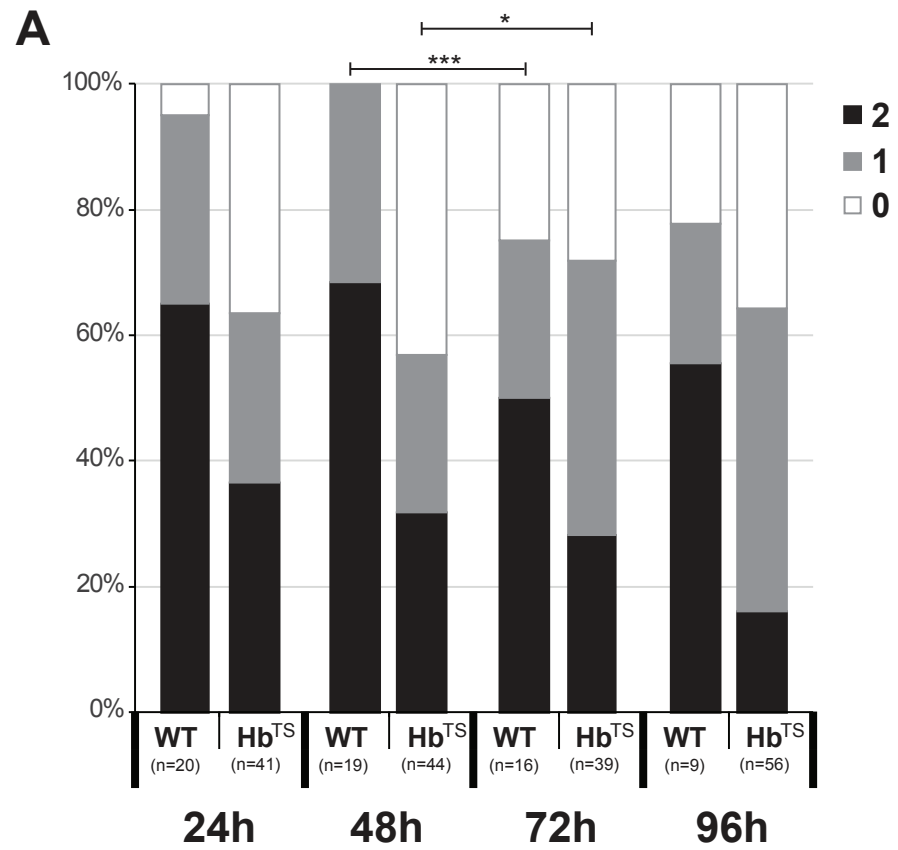

**B**

| Time at 28°C |                  | <i>p</i> -value |
|--------------|------------------|-----------------|
| 24h vs. 48h  | WT               | 0.61            |
|              | Hb <sup>TS</sup> | 0.65            |
| 48h vs. 72h  | WT               | 0.00            |
|              | Hb <sup>TS</sup> | 0.02            |
| 72h vs. 96h  | WT               | 0.95            |
|              | Hb <sup>TS</sup> | 0.12            |

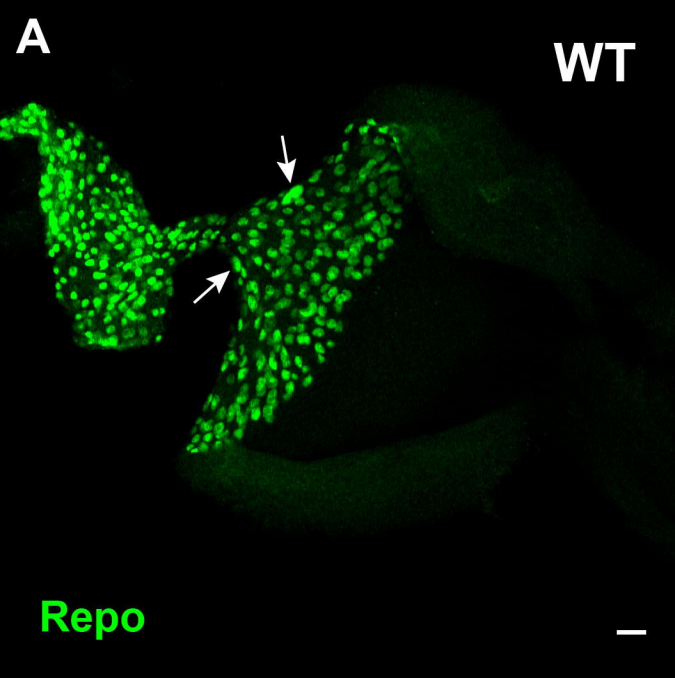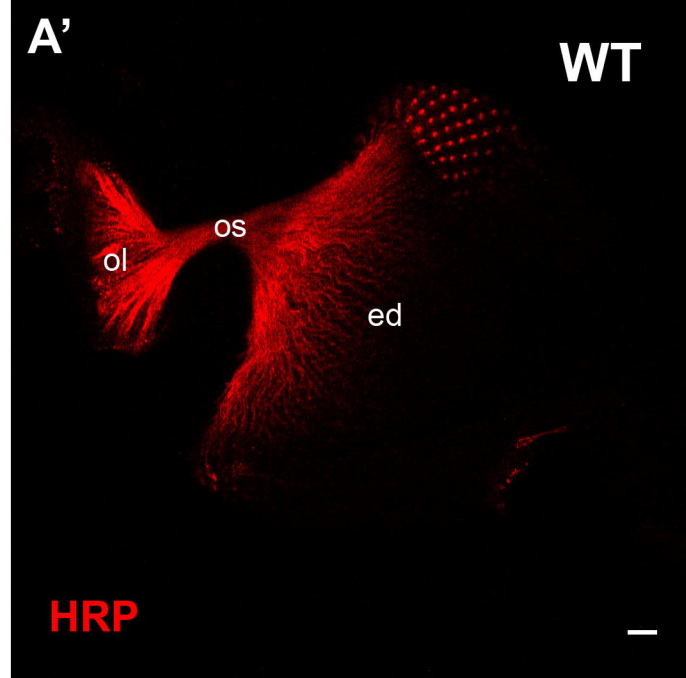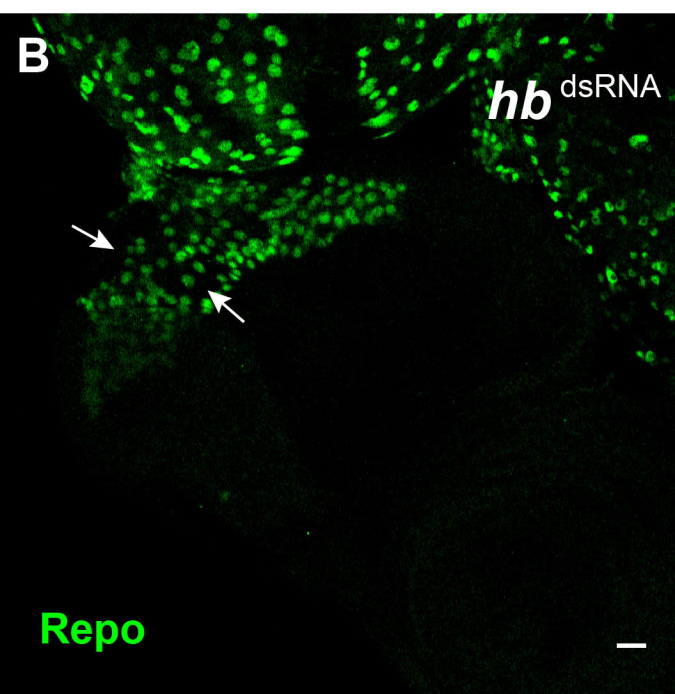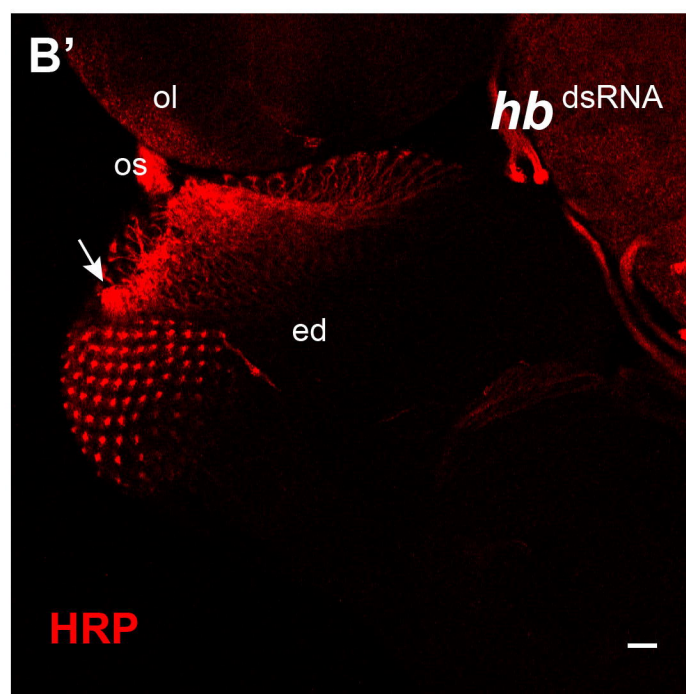

Source: http://www.biorxiv.org/content/10.1101/114363v1.full.pdf
